# Supplementary material for: RhizoBindingSites, a Database of DNA-Binding Motifs in Nitrogen-Fixing Bacteria Inferred Using a Footprint Discovery Approach
Source: Front Microbiol. 2020 Nov 5;11:567471. doi: 10.3389/fmicb.2020.567471 (PMC7674921; doi:10.3389/fmicb.2020.567471)
Supplement: Supplementary file 4 [file Table_4.XLSX]

## Sheet: Hoja1
Supplementary Table 4. Orthologs with Genomic Coverture from Rhizobium etli CFN42 Pvalue 1e-6
Locus tag	Assembly	% of Identity	e_value	Normalized Genomic coverture	locus	Protein Name
/home/htaboada/sp27/red_etli/bin/footprint_discovery_enero_2018/etli_23_Feb_2018/Rhizobiales/Rhizobium_etli_GCF_000092045.1_ASM9204v1/RHE_RS04745/RHE_RS04745_Rhizobium_etli_GCF_000092045.1_ASM9204v1_Rhizobiales_taxfreq_ortho_bbh.tab
AAV28_RS09625	Bradyrhizobium_diazoefficiens_GCF_001642675.1_ASM164267v1	67.66	4e-99
BBTA_RS11480	Bradyrhizobium_sp._BTAi1_GCF_000015165.1_ASM1516v1	66.50	7e-99	0.0586968428081093	pdxH	pyridoxine
MAFF_RS30390	Mesorhizobium_loti_GCF_000009625.1_ASM962v1	77.18	6e-117
RHE_RS04745	Rhizobium_etli_GCF_000092045.1_ASM9204v1	100.00	4e-155	0.0697280605638012	pdxH	pyridoxine/pyridoxamine 5\'-phosphate oxidase
REMIM1_RS05170	Rhizobium_etli_GCF_000442435.1_ASM44243v1	100.00	5e-155	0.0520415030987212	-	pyridoxine/pyridoxamine 5\'-phosphate oxidase
RL_RS05270	Rhizobium_leguminosarum_GCF_000009265.1_ASM926v1	95.15	6e-148	0.0604189292876126	-	pyridoxine
NGR_c05140	Sinorhizobium_fredii_GCF_000018545.1_ASM1854v1	81.07	2e-125	0.0317069432921319	pdxH	pyridoxamine 5\'-phosphate oxidase
SMc00069	Sinorhizobium_meliloti_GCF_000006965.1_ASM696v1	80.10	9e-124	0.037775124420165	pdxH	pyridoxamine 5\'-phosphate oxidase
AZC_RS06165	Azorhizobium_caulinodans_GCF_000010525.1_ASM1052v1	71.92	2e-108
/home/htaboada/sp27/red_etli/bin/footprint_discovery_enero_2018/etli_23_Feb_2018/Rhizobiales/Rhizobium_etli_GCF_000092045.1_ASM9204v1/RHE_RS19040/RHE_RS19040_Rhizobium_etli_GCF_000092045.1_ASM9204v1_Rhizobiales_taxfreq_ortho_bbh.tab
MAFF_RS27115	Mesorhizobium_loti_GCF_000009625.1_ASM962v1	75.96	1e-54
RHE_RS19040	Rhizobium_etli_GCF_000092045.1_ASM9204v1	100.00	8e-96	0.0665974129466509	-	DUF779 domain-containing protein
REMIM1_RS18810	Rhizobium_etli_GCF_000442435.1_ASM44243v1	100.00	9e-96	0.0550438975082628	-	DUF779 domain-containing protein
RL_RS21995	Rhizobium_leguminosarum_GCF_000009265.1_ASM926v1	92.31	4e-89	0.0719096459005942	-	DUF779 domain-containing protein
NGR_c23140	Sinorhizobium_fredii_GCF_000018545.1_ASM1854v1	85.83	2e-76	0.0438612715541158	-	hypothetical protein NGR_c23140
SMc02688	Sinorhizobium_meliloti_GCF_000006965.1_ASM696v1	85.71	6e-76	0.0591722228679508	-	hypothetical protein SMc02688
AZC_RS09930	Azorhizobium_caulinodans_GCF_000010525.1_ASM1052v1	66.67	6e-50	0.0889102331135455	-	DUF779 domain-containing protein
/home/htaboada/sp27/red_etli/bin/footprint_discovery_enero_2018/etli_23_Feb_2018/Rhizobiales/Rhizobium_etli_GCF_000092045.1_ASM9204v1/RHE_RS04480/RHE_RS04480_Rhizobium_etli_GCF_000092045.1_ASM9204v1_Rhizobiales_taxfreq_ortho_bbh.tab
AAV28_RS09130	Bradyrhizobium_diazoefficiens_GCF_001642675.1_ASM164267v1	57.70	0.0
BBTA_RS10985	Bradyrhizobium_sp._BTAi1_GCF_000015165.1_ASM1516v1	60.03	0.0
MAFF_RS30315	Mesorhizobium_loti_GCF_000009625.1_ASM962v1	73.54	0.0	0.0206802588681816	-	glycine--tRNA ligase subunit beta
RHE_RS04480	Rhizobium_etli_GCF_000092045.1_ASM9204v1	100.00	0.0	0.0651743913024917	-	glycine--tRNA ligase subunit beta
REMIM1_RS04905	Rhizobium_etli_GCF_000442435.1_ASM44243v1	99.57	0.0	0.0545434984400059	-	glycine--tRNA ligase subunit beta
RL_RS04955	Rhizobium_leguminosarum_GCF_000009265.1_ASM926v1	94.60	0.0	0.0441095250627356	-	glycine--tRNA ligase subunit beta
NGR_c04670	Sinorhizobium_fredii_GCF_000018545.1_ASM1854v1	80.58	0.0	0.0182314923929759	glyS	glycyl-tRNA synthetase subunit beta
SMc00851	Sinorhizobium_meliloti_GCF_000006965.1_ASM696v1	79.89	0.0	0.0089814981138854	glyS	glycyl-tRNA synthetase subunit beta
AZC_RS05290	Azorhizobium_caulinodans_GCF_000010525.1_ASM1052v1	63.01	0.0	0.0999428897772701	-	glycine--tRNA ligase subunit beta
/home/htaboada/sp27/red_etli/bin/footprint_discovery_enero_2018/etli_23_Feb_2018/Rhizobiales/Rhizobium_etli_GCF_000092045.1_ASM9204v1/RHE_RS25350/RHE_RS25350_Rhizobium_etli_GCF_000092045.1_ASM9204v1_Rhizobiales_taxfreq_ortho_bbh.tab
MAFF_RS22580	Mesorhizobium_loti_GCF_000009625.1_ASM962v1	51.22	5e-50	0.0514978995344914	-	cell wall hydrolase
RHE_RS25350	Rhizobium_etli_GCF_000092045.1_ASM9204v1	100.00	3e-166	0.0643205783159962	-	hydrolase
REMIM1_RS25595	Rhizobium_etli_GCF_000442435.1_ASM44243v1	99.63	4e-156	0.0547936979741344	-	cell wall hydrolase SleB-like protein
RL_RS31625	Rhizobium_leguminosarum_GCF_000009265.1_ASM926v1	84.17	1e-149	0.0437388567848975	-	cell wall hydrolase
/home/htaboada/sp27/red_etli/bin/footprint_discovery_enero_2018/etli_23_Feb_2018/Rhizobiales/Rhizobium_etli_GCF_000092045.1_ASM9204v1/RHE_RS18625/RHE_RS18625_Rhizobium_etli_GCF_000092045.1_ASM9204v1_Rhizobiales_taxfreq_ortho_bbh.tab
MAFF_RS14190	Mesorhizobium_loti_GCF_000009625.1_ASM962v1	69.29	1e-175	0.0504841613546786	-	gfo
RHE_RS18625	Rhizobium_etli_GCF_000092045.1_ASM9204v1	100.00	0.0	0.0614745350276778	-	gfo/Idh/MocA family oxidoreductase
REMIM1_RS18395	Rhizobium_etli_GCF_000442435.1_ASM44243v1	99.49	0.0	0.0630502826003738	-	gfo/Idh/MocA family oxidoreductase
RL_RS21505	Rhizobium_leguminosarum_GCF_000009265.1_ASM926v1	96.71	0.0	0.0492988809524692	-	gfo
NGR_c29450	Sinorhizobium_fredii_GCF_000018545.1_ASM1854v1	79.24	0.0	0.0657919073311737	-	oxidoreductase
SMc03161	Sinorhizobium_meliloti_GCF_000006965.1_ASM696v1	78.48	0.0	0.0578514143217912	-	oxidoreductase
/home/htaboada/sp27/red_etli/bin/footprint_discovery_enero_2018/etli_23_Feb_2018/Rhizobiales/Rhizobium_etli_GCF_000092045.1_ASM9204v1/RHE_RS06855/RHE_RS06855_Rhizobium_etli_GCF_000092045.1_ASM9204v1_Rhizobiales_taxfreq_ortho_bbh.tab
MAFF_RS20425	Mesorhizobium_loti_GCF_000009625.1_ASM962v1	72.32	4e-141	0.0452127228196519	-	5-deoxy-glucuronate isomerase
RHE_RS06855	Rhizobium_etli_GCF_000092045.1_ASM9204v1	100.00	0.0	0.0603361177123504	iolB	5-deoxy-glucuronate isomerase
REMIM1_RS07030	Rhizobium_etli_GCF_000442435.1_ASM44243v1	99.62	0.0	0.0530423012352351	-	5-deoxy-glucuronate isomerase
RL_RS07750	Rhizobium_leguminosarum_GCF_000009265.1_ASM926v1	95.09	0.0	0.0548589051200409	-	MULTISPECIES: 5-deoxy-glucuronate isomerase
NGR_c37000	Sinorhizobium_fredii_GCF_000018545.1_ASM1854v1	74.14	2e-150	0.0605074167824851	iolB	myo-inositol catabolism IolB domain-containing protein
SMc00432	Sinorhizobium_meliloti_GCF_000006965.1_ASM696v1	74.14	1e-150	0.0631346485064297	iolB	myo-inositol catabolism protein
/home/htaboada/sp27/red_etli/bin/footprint_discovery_enero_2018/etli_23_Feb_2018/Rhizobiales/Rhizobium_etli_GCF_000092045.1_ASM9204v1/RHE_RS06405/RHE_RS06405_Rhizobium_etli_GCF_000092045.1_ASM9204v1_Rhizobiales_taxfreq_ortho_bbh.tab
AAV28_RS11845	Bradyrhizobium_diazoefficiens_GCF_001642675.1_ASM164267v1	52.86	2e-49	0.044246544555568	-	MULTISPECIES: transcriptional regulator
BBTA_RS14215	Bradyrhizobium_sp._BTAi1_GCF_000015165.1_ASM1516v1	51.13	2e-45	0.057824027301669	-	transcriptional regulator
MAFF_RS31170	Mesorhizobium_loti_GCF_000009625.1_ASM962v1	62.60	2e-54	0.0373055650171119	-	MULTISPECIES: transcriptional regulator
RHE_RS06405	Rhizobium_etli_GCF_000092045.1_ASM9204v1	100.00	1e-106	0.0594823047258549	-	MULTISPECIES: transcriptional regulator
REMIM1_RS06615	Rhizobium_etli_GCF_000442435.1_ASM44243v1	100.00	1e-106	0.0527921017011066	-	MULTISPECIES: transcriptional regulator
RL_RS07185	Rhizobium_leguminosarum_GCF_000009265.1_ASM926v1	97.90	5e-105	0.0385495008951639	-	transcriptional regulator
NGR_c07580	Sinorhizobium_fredii_GCF_000018545.1_ASM1854v1	80.42	1e-82
SMc00058	Sinorhizobium_meliloti_GCF_000006965.1_ASM696v1	80.42	2e-83	0.0364543158740054	mucR	transcriptional regulator
AZC_RS05560	Azorhizobium_caulinodans_GCF_000010525.1_ASM1052v1	61.48	8e-47	0.0415347074399045	-	MucR family transcriptional regulator
/home/htaboada/sp27/red_etli/bin/footprint_discovery_enero_2018/etli_23_Feb_2018/Rhizobiales/Rhizobium_etli_GCF_000092045.1_ASM9204v1/RHE_RS20480/RHE_RS20480_Rhizobium_etli_GCF_000092045.1_ASM9204v1_Rhizobiales_taxfreq_ortho_bbh.tab
MAFF_RS16185	Mesorhizobium_loti_GCF_000009625.1_ASM962v1	80.53	3e-114	0.0468347039073524	-	amino acid ABC transporter permease
RHE_RS20480	Rhizobium_etli_GCF_000092045.1_ASM9204v1	100.00	2e-139	0.059197700397023	-	amino acid ABC transporter permease
REMIM1_RS20250	Rhizobium_etli_GCF_000442435.1_ASM44243v1	100.00	3e-139	0.0517913035645928	-	amino acid ABC transporter permease
RL_RS23870	Rhizobium_leguminosarum_GCF_000009265.1_ASM926v1	94.25	2e-131	0.0504108857859836	-	amino acid ABC transporter permease
NGR_c32840	Sinorhizobium_fredii_GCF_000018545.1_ASM1854v1	85.40	1e-119	0.0655276828037393	-	amino acid ABC transporter permease
SMc03893	Sinorhizobium_meliloti_GCF_000006965.1_ASM696v1	88.94	1e-119	0.0528323418463847	-	amino-acid transport system permease ABC transporter protein
/home/htaboada/sp27/red_etli/bin/footprint_discovery_enero_2018/etli_23_Feb_2018/Rhizobiales/Rhizobium_etli_GCF_000092045.1_ASM9204v1/RHE_RS18995/RHE_RS18995_Rhizobium_etli_GCF_000092045.1_ASM9204v1_Rhizobiales_taxfreq_ortho_bbh.tab
AAV28_RS38590	Bradyrhizobium_diazoefficiens_GCF_001642675.1_ASM164267v1	22.53	4e-06
RHE_RS18995	Rhizobium_etli_GCF_000092045.1_ASM9204v1	100.00	0.0	0.059197700397023	nrdF	class 1b ribonucleoside-diphosphate reductase subunit beta
REMIM1_RS18765	Rhizobium_etli_GCF_000442435.1_ASM44243v1	96.30	0.0	0.0525419021669782	-	class 1b ribonucleoside-diphosphate reductase subunit beta
RL_RS21945	Rhizobium_leguminosarum_GCF_000009265.1_ASM926v1	94.75	0.0	0.0556002416757172	-	class 1b ribonucleoside-diphosphate reductase subunit beta
/home/htaboada/sp27/red_etli/bin/footprint_discovery_enero_2018/etli_23_Feb_2018/Rhizobiales/Rhizobium_etli_GCF_000092045.1_ASM9204v1/RHE_RS17400/RHE_RS17400_Rhizobium_etli_GCF_000092045.1_ASM9204v1_Rhizobiales_taxfreq_ortho_bbh.tab
MAFF_RS04855	Mesorhizobium_loti_GCF_000009625.1_ASM962v1	36.21	4e-06	0.0176390443287431	-	hypothetical protein
RHE_RS17400	Rhizobium_etli_GCF_000092045.1_ASM9204v1	100.00	1e-53	0.0589130960681912	-	MULTISPECIES: hypothetical protein
REMIM1_RS17165	Rhizobium_etli_GCF_000442435.1_ASM44243v1	100.00	1e-53	0.0492893082233081	-	MULTISPECIES: hypothetical protein
RL_RS19965	Rhizobium_leguminosarum_GCF_000009265.1_ASM926v1	91.96	1e-50	0.0363254912281352	-	hypothetical protein
/home/htaboada/sp27/red_etli/bin/footprint_discovery_enero_2018/etli_23_Feb_2018/Rhizobiales/Rhizobium_etli_GCF_000092045.1_ASM9204v1/RHE_RS01115/RHE_RS01115_Rhizobium_etli_GCF_000092045.1_ASM9204v1_Rhizobiales_taxfreq_ortho_bbh.tab
AAV28_RS12665	Bradyrhizobium_diazoefficiens_GCF_001642675.1_ASM164267v1	49.30	6e-86	0.0203674570176424	-	MULTISPECIES: ABC transporter permease
BBTA_RS30345	Bradyrhizobium_sp._BTAi1_GCF_000015165.1_ASM1516v1	51.40	1e-89
MAFF_RS05940	Mesorhizobium_loti_GCF_000009625.1_ASM962v1	53.67	3e-90	0.0342643504776734	-	ABC transporter permease
RHE_RS01115	Rhizobium_etli_GCF_000092045.1_ASM9204v1	100.00	0.0	0.0589130960681912	-	ABC transporter permease
REMIM1_RS01545	Rhizobium_etli_GCF_000442435.1_ASM44243v1	99.37	0.0
RL_RS01195	Rhizobium_leguminosarum_GCF_000009265.1_ASM926v1	90.76	0.0	0.0174214090583914	-	ABC transporter permease
NGR_a01430	Sinorhizobium_fredii_GCF_000018545.1_ASM1854v1	39.86	1e-69
AZC_RS13950	Azorhizobium_caulinodans_GCF_000010525.1_ASM1052v1	64.10	2e-122
/home/htaboada/sp27/red_etli/bin/footprint_discovery_enero_2018/etli_23_Feb_2018/Rhizobiales/Rhizobium_etli_GCF_000092045.1_ASM9204v1/RHE_RS20030/RHE_RS20030_Rhizobium_etli_GCF_000092045.1_ASM9204v1_Rhizobiales_taxfreq_ortho_bbh.tab
AAV28_RS35825	Bradyrhizobium_diazoefficiens_GCF_001642675.1_ASM164267v1	53.01	0.0	0.0517965501741769	-	MULTISPECIES: M3 family peptidase
BBTA_RS06375	Bradyrhizobium_sp._BTAi1_GCF_000015165.1_ASM1516v1	52.86	0.0	0.0584786389314993	-	M3 family peptidase
MAFF_RS17205	Mesorhizobium_loti_GCF_000009625.1_ASM962v1	62.55	0.0	0.0190582777804811	-	dipeptidyl carboxypeptidase II
RHE_RS20030	Rhizobium_etli_GCF_000092045.1_ASM9204v1	100.00	0.0	0.0583438874105275	-	peptidase M3
REMIM1_RS19800	Rhizobium_etli_GCF_000442435.1_ASM44243v1	99.86	0.0	0.0560446956447767	-	peptidyl-dipeptidase Dcp
RL_RS23225	Rhizobium_leguminosarum_GCF_000009265.1_ASM926v1	92.95	0.0	0.0515228906194979	-	dipeptidyl carboxypeptidase II
NGR_c33160	Sinorhizobium_fredii_GCF_000018545.1_ASM1854v1	78.82	0.0	0.0335565149841729	-	peptidyl-dipeptidase Dcp
SMc04403	Sinorhizobium_meliloti_GCF_000006965.1_ASM696v1	78.72	0.0	0.0245670389585689	dcp	peptidyl-dipeptidase A protein
/home/htaboada/sp27/red_etli/bin/footprint_discovery_enero_2018/etli_23_Feb_2018/Rhizobiales/Rhizobium_etli_GCF_000092045.1_ASM9204v1/RHE_RS07270/RHE_RS07270_Rhizobium_etli_GCF_000092045.1_ASM9204v1_Rhizobiales_taxfreq_ortho_bbh.tab
BBTA_RS01025	Bradyrhizobium_sp._BTAi1_GCF_000015165.1_ASM1516v1	43.75	3e-29	0.066770386242682	-	endonuclease domain-containing protein
RHE_RS07270	Rhizobium_etli_GCF_000092045.1_ASM9204v1	100.00	8e-89	0.0583438874105275	-	endonuclease domain-containing protein
REMIM1_RS07445	Rhizobium_etli_GCF_000442435.1_ASM44243v1	100.00	9e-89	0.0457865147455095	-	endonuclease domain-containing protein
NGR_c05590	Sinorhizobium_fredii_GCF_000018545.1_ASM1854v1	72.27	3e-66	0.0583936205630096	-	hypothetical protein NGR_c05590
AZC_RS00405	Azorhizobium_caulinodans_GCF_000010525.1_ASM1052v1	43.97	9e-31	0.100591869581019	-	endonuclease domain-containing protein
/home/htaboada/sp27/red_etli/bin/footprint_discovery_enero_2018/etli_23_Feb_2018/Rhizobiales/Rhizobium_etli_GCF_000092045.1_ASM9204v1/RHE_RS20580/RHE_RS20580_Rhizobium_etli_GCF_000092045.1_ASM9204v1_Rhizobiales_taxfreq_ortho_bbh.tab
MAFF_RS16195	Mesorhizobium_loti_GCF_000009625.1_ASM962v1	65.72	5e-131	0.0506869089906412	-	RNA polymerase factor sigma-32
RHE_RS20580	Rhizobium_etli_GCF_000092045.1_ASM9204v1	100.00	0.0	0.0577746787528638	-	MULTISPECIES: RNA polymerase factor sigma-32
REMIM1_RS20350	Rhizobium_etli_GCF_000442435.1_ASM44243v1	100.00	0.0	0.0525419021669782	-	MULTISPECIES: RNA polymerase factor sigma-32
RL_RS23765	Rhizobium_leguminosarum_GCF_000009265.1_ASM926v1	99.30	0.0	0.0448508616184118	-	MULTISPECIES: RNA polymerase factor sigma-32
NGR_c32660	Sinorhizobium_fredii_GCF_000018545.1_ASM1854v1	75.44	4e-157	0.0309142697098286	rpoH2	RNA polymerase factor sigma-32
SMc03873	Sinorhizobium_meliloti_GCF_000006965.1_ASM696v1	75.79	2e-159	0.0398884180940204	rpoH2	RNA polymerase factor sigma-32
/home/htaboada/sp27/red_etli/bin/footprint_discovery_enero_2018/etli_23_Feb_2018/Rhizobiales/Rhizobium_etli_GCF_000092045.1_ASM9204v1/RHE_RS05965/RHE_RS05965_Rhizobium_etli_GCF_000092045.1_ASM9204v1_Rhizobiales_taxfreq_ortho_bbh.tab
AAV28_RS02585	Bradyrhizobium_diazoefficiens_GCF_001642675.1_ASM164267v1	57.37	3e-167
BBTA_RS03735	Bradyrhizobium_sp._BTAi1_GCF_000015165.1_ASM1516v1	56.44	1e-162
MAFF_RS22480	Mesorhizobium_loti_GCF_000009625.1_ASM962v1	64.99	0.0
RHE_RS05965	Rhizobium_etli_GCF_000092045.1_ASM9204v1	100.00	0.0	0.057490074424032	-	ATP-dependent DNA ligase
REMIM1_RS06205	Rhizobium_etli_GCF_000442435.1_ASM44243v1	99.82	0.0	0.0480383105526658	-	ATP-dependent DNA ligase
RL_RS06745	Rhizobium_leguminosarum_GCF_000009265.1_ASM926v1	93.72	0.0	0.0455921981740881	-	ATP-dependent DNA ligase
NGR_c29660	Sinorhizobium_fredii_GCF_000018545.1_ASM1854v1	72.36	0.0
SMc03177	Sinorhizobium_meliloti_GCF_000006965.1_ASM696v1	72.91	0.0
AZC_RS02010	Azorhizobium_caulinodans_GCF_000010525.1_ASM1052v1	55.43	0.0
/home/htaboada/sp27/red_etli/bin/footprint_discovery_enero_2018/etli_23_Feb_2018/Rhizobiales/Rhizobium_etli_GCF_000092045.1_ASM9204v1/RHE_RS12350/RHE_RS12350_Rhizobium_etli_GCF_000092045.1_ASM9204v1_Rhizobiales_taxfreq_ortho_bbh.tab
MAFF_RS03295	Mesorhizobium_loti_GCF_000009625.1_ASM962v1	57.50	2e-91	0.0212885017760693	-	amino acid ABC transporter
RHE_RS12350	Rhizobium_etli_GCF_000092045.1_ASM9204v1	100.00	5e-172	0.0560670527798728	-	MULTISPECIES: amino acid ABC transporter
REMIM1_RS12185	Rhizobium_etli_GCF_000442435.1_ASM44243v1	100.00	5e-172	0.0507905054280789	-	MULTISPECIES: amino acid ABC transporter
RL_RS14210	Rhizobium_leguminosarum_GCF_000009265.1_ASM926v1	97.67	2e-175	0.0463335347297643	-	amino acid ABC transporter
NGR_c17180	Sinorhizobium_fredii_GCF_000018545.1_ASM1854v1	67.95	6e-116	0.0417474753346404	-	ABC transporter substrate-binding protein
SMc00140	Sinorhizobium_meliloti_GCF_000006965.1_ASM696v1	69.11	1e-126	0.038039286129397	-	amino-acid binding periplasmic protein
/home/htaboada/sp27/red_etli/bin/footprint_discovery_enero_2018/etli_23_Feb_2018/Rhizobiales/Rhizobium_etli_GCF_000092045.1_ASM9204v1/RHE_RS11105/RHE_RS11105_Rhizobium_etli_GCF_000092045.1_ASM9204v1_Rhizobiales_taxfreq_ortho_bbh.tab
MAFF_RS02590	Mesorhizobium_loti_GCF_000009625.1_ASM962v1	60.32	1e-19	0.0482539373590904	-	GlsB
RHE_RS11105	Rhizobium_etli_GCF_000092045.1_ASM9204v1	100.00	5e-38	0.0560670527798728	-	GlsB/YeaQ/YmgE family stress response membrane protein
REMIM1_RS10950	Rhizobium_etli_GCF_000442435.1_ASM44243v1	100.00	6e-38	0.0517913035645928	-	GlsB/YeaQ/YmgE family stress response membrane protein
RL_RS12830	Rhizobium_leguminosarum_GCF_000009265.1_ASM926v1	85.48	2e-32	0.029282793949211	-	GlsB
NGR_c12890	Sinorhizobium_fredii_GCF_000018545.1_ASM1854v1	59.02	2e-18	0.0290646980177876	-	transmembrane protein
SMc01036	Sinorhizobium_meliloti_GCF_000006965.1_ASM696v1	57.38	1e-16	0.0287936263062797	-	hypothetical protein SMc01036
/home/htaboada/sp27/red_etli/bin/footprint_discovery_enero_2018/etli_23_Feb_2018/Rhizobiales/Rhizobium_etli_GCF_000092045.1_ASM9204v1/RHE_RS18130/RHE_RS18130_Rhizobium_etli_GCF_000092045.1_ASM9204v1_Rhizobiales_taxfreq_ortho_bbh.tab
MAFF_RS12815	Mesorhizobium_loti_GCF_000009625.1_ASM962v1	69.09	7e-102	0.0287901643066842	-	DUF882 domain-containing protein
RHE_RS18130	Rhizobium_etli_GCF_000092045.1_ASM9204v1	100.00	0.0	0.0557824484510409	-	DUF882 domain-containing protein
REMIM1_RS17895	Rhizobium_etli_GCF_000442435.1_ASM44243v1	99.67	0.0	0.0490391086891796	-	DUF882 domain-containing protein
RL_RS20980	Rhizobium_leguminosarum_GCF_000009265.1_ASM926v1	89.61	0.0	0.038920169173002	-	DUF882 domain-containing protein
NGR_c28400	Sinorhizobium_fredii_GCF_000018545.1_ASM1854v1	50.00	4e-168	0.0364629847859517	-	hypothetical protein NGR_c28400
SMc04010	Sinorhizobium_meliloti_GCF_000006965.1_ASM696v1	52.20	8e-167	0.0351335073278458	-	hypothetical protein SMc04010
AZC_RS02240	Azorhizobium_caulinodans_GCF_000010525.1_ASM1052v1	53.85	1e-78	0.0603551217486112	-	DUF882 domain-containing protein
/home/htaboada/sp27/red_etli/bin/footprint_discovery_enero_2018/etli_23_Feb_2018/Rhizobiales/Rhizobium_etli_GCF_000092045.1_ASM9204v1/RHE_RS14750/RHE_RS14750_Rhizobium_etli_GCF_000092045.1_ASM9204v1_Rhizobiales_taxfreq_ortho_bbh.tab
MAFF_RS13105	Mesorhizobium_loti_GCF_000009625.1_ASM962v1	59.87	0.0	0.0435907417319514	-	aldehyde dehydrogenase
RHE_RS14750	Rhizobium_etli_GCF_000092045.1_ASM9204v1	100.00	0.0	0.0557824484510409	-	aldehyde dehydrogenase
REMIM1_RS14590	Rhizobium_etli_GCF_000442435.1_ASM44243v1	100.00	0.0	0.0492893082233081	-	aldehyde dehydrogenase
RL_RS17220	Rhizobium_leguminosarum_GCF_000009265.1_ASM926v1	96.75	0.0	0.0541175685643647	-	aldehyde dehydrogenase
NGR_c21440	Sinorhizobium_fredii_GCF_000018545.1_ASM1854v1	86.12	0.0	0.0554871507612309	-	aldehyde dehydrogenase
SMc01588	Sinorhizobium_meliloti_GCF_000006965.1_ASM696v1	86.77	0.0	0.0538889886833124	-	aldehyde dehydrogenase
/home/htaboada/sp27/red_etli/bin/footprint_discovery_enero_2018/etli_23_Feb_2018/Rhizobiales/Rhizobium_etli_GCF_000092045.1_ASM9204v1/RHE_RS12545/RHE_RS12545_Rhizobium_etli_GCF_000092045.1_ASM9204v1_Rhizobiales_taxfreq_ortho_bbh.tab
MAFF_RS14010	Mesorhizobium_loti_GCF_000009625.1_ASM962v1	76.61	0.0	0.0427797511881012	-	glyceraldehyde 3-phosphate reductase
RHE_RS12545	Rhizobium_etli_GCF_000092045.1_ASM9204v1	100.00	0.0	0.0557824484510409	-	glyceraldehyde 3-phosphate reductase
REMIM1_RS12380	Rhizobium_etli_GCF_000442435.1_ASM44243v1	100.00	0.0	0.0485387096209227	-	glyceraldehyde 3-phosphate reductase
RL_RS14405	Rhizobium_leguminosarum_GCF_000009265.1_ASM926v1	93.59	0.0	0.0556002416757172	-	glyceraldehyde 3-phosphate reductase
NGR_c17760	Sinorhizobium_fredii_GCF_000018545.1_ASM1854v1	88.30	0.0	0.0626212130019606	-	oxidoreductase protein
SMc04252	Sinorhizobium_meliloti_GCF_000006965.1_ASM696v1	87.98	0.0	0.0702670146556916	-	oxidoreductase
/home/htaboada/sp27/red_etli/bin/footprint_discovery_enero_2018/etli_23_Feb_2018/Rhizobiales/Rhizobium_etli_GCF_000092045.1_ASM9204v1/RHE_RS08130/RHE_RS08130_Rhizobium_etli_GCF_000092045.1_ASM9204v1_Rhizobiales_taxfreq_ortho_bbh.tab
MAFF_RS34445	Mesorhizobium_loti_GCF_000009625.1_ASM962v1	73.33	5e-34	0.0425770035521386	-	MULTISPECIES: HU family DNA-binding protein
RHE_RS08130	Rhizobium_etli_GCF_000092045.1_ASM9204v1	100.00	2e-50	0.0557824484510409	-	MULTISPECIES: DNA-binding protein HRL53
REMIM1_RS08290	Rhizobium_etli_GCF_000442435.1_ASM44243v1	100.00	2e-50	0.057295693315419	-	MULTISPECIES: DNA-binding protein HRL53
RL_RS08775	Rhizobium_leguminosarum_GCF_000009265.1_ASM926v1	100.00	1e-49	0.0392908374508401	-	HU family DNA-binding protein
NGR_c10380	Sinorhizobium_fredii_GCF_000018545.1_ASM1854v1	81.11	1e-40	0.0351418621487795	-	DNA-binding protein HRm
SMc01906	Sinorhizobium_meliloti_GCF_000006965.1_ASM696v1	81.11	6e-41	0.0427941968955716	hrm	histone-like protein
AZC_RS08355	Azorhizobium_caulinodans_GCF_000010525.1_ASM1052v1	60.67	5e-24	0.0584081823373657	-	HU family DNA-binding protein
/home/htaboada/sp27/red_etli/bin/footprint_discovery_enero_2018/etli_23_Feb_2018/Rhizobiales/Rhizobium_etli_GCF_000092045.1_ASM9204v1/RHE_RS02865/RHE_RS02865_Rhizobium_etli_GCF_000092045.1_ASM9204v1_Rhizobiales_taxfreq_ortho_bbh.tab
AAV28_RS22150	Bradyrhizobium_diazoefficiens_GCF_001642675.1_ASM164267v1	60.28	5e-41
BBTA_RS21990	Bradyrhizobium_sp._BTAi1_GCF_000015165.1_ASM1516v1	58.16	2e-39	0.0325123776149007	mscL	large conductance mechanosensitive channel protein MscL
MAFF_RS23305	Mesorhizobium_loti_GCF_000009625.1_ASM962v1	71.83	7e-53	0.0121648581577539	mscL	large conductance mechanosensitive channel protein MscL
RHE_RS02865	Rhizobium_etli_GCF_000092045.1_ASM9204v1	100.00	2e-77	0.0557824484510409	mscL	MULTISPECIES: large conductance mechanosensitive channel protein MscL
REMIM1_RS03265	Rhizobium_etli_GCF_000442435.1_ASM44243v1	100.00	3e-77	0.0507905054280789	mscL	MULTISPECIES: large conductance mechanosensitive channel protein MscL
RL_RS03155	Rhizobium_leguminosarum_GCF_000009265.1_ASM926v1	90.91	9e-69	0.0311361353384016	mscL	large conductance mechanosensitive channel protein MscL
NGR_c01860	Sinorhizobium_fredii_GCF_000018545.1_ASM1854v1	76.22	3e-57	0.0251013301062711	mscL	large-conductance mechanosensitive channel
SMc02250	Sinorhizobium_meliloti_GCF_000006965.1_ASM696v1	72.03	1e-53	0.0269444943416562	mscL	large-conductance mechanosensitive channel
AZC_RS23775	Azorhizobium_caulinodans_GCF_000010525.1_ASM1052v1	55.32	9e-30	0.0947510513472821	mscL	large conductance mechanosensitive channel protein MscL
/home/htaboada/sp27/red_etli/bin/footprint_discovery_enero_2018/etli_23_Feb_2018/Rhizobiales/Rhizobium_etli_GCF_000092045.1_ASM9204v1/RHE_RS10680/RHE_RS10680_Rhizobium_etli_GCF_000092045.1_ASM9204v1_Rhizobiales_taxfreq_ortho_bbh.tab
AAV28_RS12525	Bradyrhizobium_diazoefficiens_GCF_001642675.1_ASM164267v1	75.93	7e-166	0.0207186200696708	-	MULTISPECIES: sugar ABC transporter substrate-binding protein
BBTA_RS09910	Bradyrhizobium_sp._BTAi1_GCF_000015165.1_ASM1516v1	77.36	2e-167	0.0460410179647252	-	sugar ABC transporter substrate-binding protein
MAFF_RS05210	Mesorhizobium_loti_GCF_000009625.1_ASM962v1	38.06	2e-45	0.0340616028417109	-	ribose ABC transporter substrate-binding protein
RHE_RS10680	Rhizobium_etli_GCF_000092045.1_ASM9204v1	100.00	0.0	0.0554978441222091	-	sugar ABC transporter substrate-binding protein
REMIM1_RS10525	Rhizobium_etli_GCF_000442435.1_ASM44243v1	100.00	0.0	0.0495395077574366	-	sugar ABC transporter substrate-binding protein
RL_RS12260	Rhizobium_leguminosarum_GCF_000009265.1_ASM926v1	97.81	0.0	0.0348428181167827	-	MULTISPECIES: sugar ABC transporter substrate-binding protein
NGR_b15480	Sinorhizobium_fredii_GCF_000018545.1_ASM1854v1	84.69	0.0	0.0404263526974682	-	sugar ABC transporter substrate-binding protein (plasmid)
SM_b21587	Sinorhizobium_meliloti_GCF_000006965.1_ASM696v1	85.31	0.0	0.0375109627109331	-	sugar uptake ABC transporter substrate-binding protein precursor (plasmid)
/home/htaboada/sp27/red_etli/bin/footprint_discovery_enero_2018/etli_23_Feb_2018/Rhizobiales/Rhizobium_etli_GCF_000092045.1_ASM9204v1/RHE_RS05805/RHE_RS05805_Rhizobium_etli_GCF_000092045.1_ASM9204v1_Rhizobiales_taxfreq_ortho_bbh.tab
BBTA_RS28125	Bradyrhizobium_sp._BTAi1_GCF_000015165.1_ASM1516v1	46.20	3e-158
MAFF_RS31025	Mesorhizobium_loti_GCF_000009625.1_ASM962v1	73.41	0.0
RHE_RS05805	Rhizobium_etli_GCF_000092045.1_ASM9204v1	100.00	0.0	0.0552132397933773	betA	oxygen-dependent choline dehydrogenase
REMIM1_RS06045	Rhizobium_etli_GCF_000442435.1_ASM44243v1	99.27	0.0	0.0492893082233081	-	choline dehydrogenase
RL_RS06625	Rhizobium_leguminosarum_GCF_000009265.1_ASM926v1	95.08	0.0	0.0607895975654507	-	oxygen-dependent choline dehydrogenase
NGR_c06990	Sinorhizobium_fredii_GCF_000018545.1_ASM1854v1	88.34	0.0	0.0663203563860426	betA	choline dehydrogenase
SMc00093	Sinorhizobium_meliloti_GCF_000006965.1_ASM696v1	90.16	0.0	0.058643899449487	betA	choline dehydrogenase
AZC_RS06090	Azorhizobium_caulinodans_GCF_000010525.1_ASM1052v1	60.41	0.0
/home/htaboada/sp27/red_etli/bin/footprint_discovery_enero_2018/etli_23_Feb_2018/Rhizobiales/Rhizobium_etli_GCF_000092045.1_ASM9204v1/RHE_RS05165/RHE_RS05165_Rhizobium_etli_GCF_000092045.1_ASM9204v1_Rhizobiales_taxfreq_ortho_bbh.tab
AAV28_RS03145	Bradyrhizobium_diazoefficiens_GCF_001642675.1_ASM164267v1	30.85	4e-14	0.0263372289021238	-	MULTISPECIES: dehydrogenase
BBTA_RS10430	Bradyrhizobium_sp._BTAi1_GCF_000015165.1_ASM1516v1	60.63	7e-102	0.0541145613992978	-	KR domain-containing protein
RHE_RS05165	Rhizobium_etli_GCF_000092045.1_ASM9204v1	100.00	2e-180	0.0552132397933773	-	KR domain-containing protein
REMIM1_RS05595	Rhizobium_etli_GCF_000442435.1_ASM44243v1	93.82	6e-169	0.0527921017011066	-	KR domain-containing protein
RL_RS05735	Rhizobium_leguminosarum_GCF_000009265.1_ASM926v1	85.21	7e-159	0.0548589051200409	-	KR domain-containing protein
/home/htaboada/sp27/red_etli/bin/footprint_discovery_enero_2018/etli_23_Feb_2018/Rhizobiales/Rhizobium_etli_GCF_000092045.1_ASM9204v1/RHE_RS20815/RHE_RS20815_Rhizobium_etli_GCF_000092045.1_ASM9204v1_Rhizobiales_taxfreq_ortho_bbh.tab
AAV28_RS37845	Bradyrhizobium_diazoefficiens_GCF_001642675.1_ASM164267v1	64.60	2e-77
MAFF_RS06995	Mesorhizobium_loti_GCF_000009625.1_ASM962v1	75.76	2e-99	0.0133813439735293	-	molybdate ABC transporter permease subunit
RHE_RS20815	Rhizobium_etli_GCF_000092045.1_ASM9204v1	100.00	3e-130	0.0543594268068817	-	molybdate ABC transporter permease subunit
REMIM1_RS20690	Rhizobium_etli_GCF_000442435.1_ASM44243v1	99.14	2e-129	0.0462869138137665	-	molybdate ABC transporter permease subunit
RL_RS24115	Rhizobium_leguminosarum_GCF_000009265.1_ASM926v1	94.85	4e-124	0.0418855153957069	-	molybdate ABC transporter permease subunit
NGR_c29850	Sinorhizobium_fredii_GCF_000018545.1_ASM1854v1	78.87	2e-96	0.0443897206089847	modB	molybdate ABC transporter permease
SMc03197	Sinorhizobium_meliloti_GCF_000006965.1_ASM696v1	78.87	1e-98	0.0544173121017762	modB	molybdate ABC transporter permease
AZC_RS12265	Azorhizobium_caulinodans_GCF_000010525.1_ASM1052v1	55.61	2e-47	0.107081667618504	-	molybdate ABC transporter permease subunit
/home/htaboada/sp27/red_etli/bin/footprint_discovery_enero_2018/etli_23_Feb_2018/Rhizobiales/Rhizobium_etli_GCF_000092045.1_ASM9204v1/RHE_RS14820/RHE_RS14820_Rhizobium_etli_GCF_000092045.1_ASM9204v1_Rhizobiales_taxfreq_ortho_bbh.tab
MAFF_RS19630	Mesorhizobium_loti_GCF_000009625.1_ASM962v1	53.71	6e-91	0.033047864661898	-	N-acetylglucosamine kinase
RHE_RS14820	Rhizobium_etli_GCF_000092045.1_ASM9204v1	100.00	0.0	0.0543594268068817	-	N-acetylglucosamine kinase
REMIM1_RS14660	Rhizobium_etli_GCF_000442435.1_ASM44243v1	98.98	0.0	0.0457865147455095	-	N-acetylglucosamine kinase
RL_RS17295	Rhizobium_leguminosarum_GCF_000009265.1_ASM926v1	90.48	1e-179	0.0437388567848975	-	N-acetylglucosamine kinase
NGR_c35310	Sinorhizobium_fredii_GCF_000018545.1_ASM1854v1	50.00	3e-87	0.0446539451364191	-	BadF
SMc02875	Sinorhizobium_meliloti_GCF_000006965.1_ASM696v1	50.71	6e-88	0.0441150054417312	-	hypothetical protein SMc02875
/home/htaboada/sp27/red_etli/bin/footprint_discovery_enero_2018/etli_23_Feb_2018/Rhizobiales/Rhizobium_etli_GCF_000092045.1_ASM9204v1/RHE_RS26605/RHE_RS26605_Rhizobium_etli_GCF_000092045.1_ASM9204v1_Rhizobiales_taxfreq_ortho_bbh.tab
MAFF_RS28650	Mesorhizobium_loti_GCF_000009625.1_ASM962v1	89.35	8e-163	0.053119880622192	-	D-ribose ABC transporter substrate-binding protein
RHE_RS26605	Rhizobium_etli_GCF_000092045.1_ASM9204v1	100.00	0.0	0.0540748224780499	-	D-ribose ABC transporter substrate-binding protein
REMIM1_RS29620	Rhizobium_etli_GCF_000442435.1_ASM44243v1	99.66	0.0	0.049789707291565	-	MULTISPECIES: D-ribose ABC transporter substrate-binding protein
RL_RS34880	Rhizobium_leguminosarum_GCF_000009265.1_ASM926v1	98.29	1e-178	0.0348428181167827	-	MULTISPECIES: D-ribose ABC transporter substrate-binding protein
NGR_b22070	Sinorhizobium_fredii_GCF_000018545.1_ASM1854v1	86.30	3e-157	0.0306500451823942	-	ribose ABC transporter periplasmic ribose-binding protein (plasmid)
SM_b20349	Sinorhizobium_meliloti_GCF_000006965.1_ASM696v1	86.60	2e-147	0.0332843753632224	-	sugar ABC transporter (plasmid)
/home/htaboada/sp27/red_etli/bin/footprint_discovery_enero_2018/etli_23_Feb_2018/Rhizobiales/Rhizobium_etli_GCF_000092045.1_ASM9204v1/RHE_RS27555/RHE_RS27555_Rhizobium_etli_GCF_000092045.1_ASM9204v1_Rhizobiales_taxfreq_ortho_bbh.tab
AAV28_RS07740	Bradyrhizobium_diazoefficiens_GCF_001642675.1_ASM164267v1	48.98	1e-98	0.0275662995842229	-	MULTISPECIES: sugar ABC transporter substrate-binding protein
BBTA_RS28800	Bradyrhizobium_sp._BTAi1_GCF_000015165.1_ASM1516v1	65.94	2e-160
MAFF_RS20385	Mesorhizobium_loti_GCF_000009625.1_ASM962v1	87.50	0.0	0.0366973221092242	-	ABC transporter substrate-binding protein
RHE_RS27555	Rhizobium_etli_GCF_000092045.1_ASM9204v1	100.00	0.0	0.053790218149218	-	MULTISPECIES: ABC transporter substrate-binding protein
REMIM1_RS32930	Rhizobium_etli_GCF_000442435.1_ASM44243v1	99.69	0.0	0.049789707291565	-	sugar ABC transporter substrate-binding protein
RL_RS12625	Rhizobium_leguminosarum_GCF_000009265.1_ASM926v1	95.94	0.0	0.0396615057286782	-	ABC transporter substrate-binding protein
/home/htaboada/sp27/red_etli/bin/footprint_discovery_enero_2018/etli_23_Feb_2018/Rhizobiales/Rhizobium_etli_GCF_000092045.1_ASM9204v1/RHE_RS19385/RHE_RS19385_Rhizobium_etli_GCF_000092045.1_ASM9204v1_Rhizobiales_taxfreq_ortho_bbh.tab
RHE_RS19385	Rhizobium_etli_GCF_000092045.1_ASM9204v1	100.00	2e-160	0.053790218149218	-	electron transfer flavoprotein subunit beta/FixA family protein
SMa1391	Sinorhizobium_meliloti_GCF_000006965.1_ASM696v1	91.57	1e-147
/home/htaboada/sp27/red_etli/bin/footprint_discovery_enero_2018/etli_23_Feb_2018/Rhizobiales/Rhizobium_etli_GCF_000092045.1_ASM9204v1/RHE_RS06125/RHE_RS06125_Rhizobium_etli_GCF_000092045.1_ASM9204v1_Rhizobiales_taxfreq_ortho_bbh.tab
MAFF_RS27580	Mesorhizobium_loti_GCF_000009625.1_ASM962v1	39.74	5e-09
RHE_RS06125	Rhizobium_etli_GCF_000092045.1_ASM9204v1	100.00	2e-165	0.053790218149218	-	ammonia-dependent NAD(+) synthetase
REMIM1_RS06365	Rhizobium_etli_GCF_000442435.1_ASM44243v1	99.64	4e-164	0.0520415030987212	-	ammonia-dependent NAD(+) synthetase
RL_RS06945	Rhizobium_leguminosarum_GCF_000009265.1_ASM926v1	94.58	2e-156	0.0415148471178688	-	ammonia-dependent NAD(+) synthetase
NGR_b19180	Sinorhizobium_fredii_GCF_000018545.1_ASM1854v1	38.10	1e-11
SM_b20649	Sinorhizobium_meliloti_GCF_000006965.1_ASM696v1	38.10	2e-11
/home/htaboada/sp27/red_etli/bin/footprint_discovery_enero_2018/etli_23_Feb_2018/Rhizobiales/Rhizobium_etli_GCF_000092045.1_ASM9204v1/RHE_RS20025/RHE_RS20025_Rhizobium_etli_GCF_000092045.1_ASM9204v1_Rhizobiales_taxfreq_ortho_bbh.tab
AAV28_RS41210	Bradyrhizobium_diazoefficiens_GCF_001642675.1_ASM164267v1	77.92	0.0	0.0361697943589167	-	MULTISPECIES: translational GTPase TypA
BBTA_RS01250	Bradyrhizobium_sp._BTAi1_GCF_000015165.1_ASM1516v1	78.42	0.0	0.0534599497694676	typA	translational GTPase TypA
MAFF_RS17120	Mesorhizobium_loti_GCF_000009625.1_ASM962v1	86.38	0.0	0.0314258835741975	-	translational GTPase TypA
RHE_RS20025	Rhizobium_etli_GCF_000092045.1_ASM9204v1	100.00	0.0	0.0535056138203862	typA	MULTISPECIES: translational GTPase TypA
REMIM1_RS19795	Rhizobium_etli_GCF_000442435.1_ASM44243v1	100.00	0.0	0.049789707291565	-	MULTISPECIES: translational GTPase TypA
RL_RS23220	Rhizobium_leguminosarum_GCF_000009265.1_ASM926v1	89.77	0.0	0.0333601450054303	-	translational GTPase TypA
NGR_c32000	Sinorhizobium_fredii_GCF_000018545.1_ASM1854v1	90.91	0.0	0.0457108432461569	-	GTP-binding protein TypA
SMc03242	Sinorhizobium_meliloti_GCF_000006965.1_ASM696v1	91.40	0.0	0.0393600946755566	typA	GTP-binding protein
AZC_RS01685	Azorhizobium_caulinodans_GCF_000010525.1_ASM1052v1	82.83	0.0	0.0681428793935933	-	translational GTPase TypA
/home/htaboada/sp27/red_etli/bin/footprint_discovery_enero_2018/etli_23_Feb_2018/Rhizobiales/Rhizobium_etli_GCF_000092045.1_ASM9204v1/RHE_RS15095/RHE_RS15095_Rhizobium_etli_GCF_000092045.1_ASM9204v1_Rhizobiales_taxfreq_ortho_bbh.tab
BBTA_RS09870	Bradyrhizobium_sp._BTAi1_GCF_000015165.1_ASM1516v1	29.61	9e-42	0.0392766977898129	-	Zn-dependent oxidoreductase
MAFF_RS33725	Mesorhizobium_loti_GCF_000009625.1_ASM962v1	83.14	0.0	0.0243297163155078	-	L-threonine 3-dehydrogenase
RHE_RS15095	Rhizobium_etli_GCF_000092045.1_ASM9204v1	100.00	0.0	0.0532210094915544	-	MULTISPECIES: L-threonine 3-dehydrogenase
REMIM1_RS14870	Rhizobium_etli_GCF_000442435.1_ASM44243v1	99.71	0.0	0.0477881110185373	-	MULTISPECIES: L-threonine 3-dehydrogenase
RL_RS17540	Rhizobium_leguminosarum_GCF_000009265.1_ASM926v1	98.84	0.0	0.0541175685643647	-	L-threonine 3-dehydrogenase
NGR_c22690	Sinorhizobium_fredii_GCF_000018545.1_ASM1854v1	93.91	0.0	0.0623569884745261	tdh	L-threonine 3-dehydrogenase
SMc01564	Sinorhizobium_meliloti_GCF_000006965.1_ASM696v1	92.15	0.0	0.0361901541647735	tdh	L-threonine 3-dehydrogenase
/home/htaboada/sp27/red_etli/bin/footprint_discovery_enero_2018/etli_23_Feb_2018/Rhizobiales/Rhizobium_etli_GCF_000092045.1_ASM9204v1/RHE_RS14810/RHE_RS14810_Rhizobium_etli_GCF_000092045.1_ASM9204v1_Rhizobiales_taxfreq_ortho_bbh.tab
MAFF_RS19645	Mesorhizobium_loti_GCF_000009625.1_ASM962v1	74.11	2e-166	0.0334533599338232	-	sugar ABC transporter permease
RHE_RS14810	Rhizobium_etli_GCF_000092045.1_ASM9204v1	100.00	0.0	0.0529364051627225	-	sugar ABC transporter permease
REMIM1_RS14650	Rhizobium_etli_GCF_000442435.1_ASM44243v1	100.00	0.0	0.0510407049622074	-	sugar ABC transporter permease
RL_RS17285	Rhizobium_leguminosarum_GCF_000009265.1_ASM926v1	95.87	0.0	0.0429975202292213	-	sugar ABC transporter permease
NGR_c35280	Sinorhizobium_fredii_GCF_000018545.1_ASM1854v1	83.81	0.0	0.0541660281240587	-	binding-protein-dependent transport system inner membrane protein
SMc02872	Sinorhizobium_meliloti_GCF_000006965.1_ASM696v1	82.54	0.0	0.0351335073278458	-	ABC transporter permease
/home/htaboada/sp27/red_etli/bin/footprint_discovery_enero_2018/etli_23_Feb_2018/Rhizobiales/Rhizobium_etli_GCF_000092045.1_ASM9204v1/RHE_RS12485/RHE_RS12485_Rhizobium_etli_GCF_000092045.1_ASM9204v1_Rhizobiales_taxfreq_ortho_bbh.tab
AAV28_RS12905	Bradyrhizobium_diazoefficiens_GCF_001642675.1_ASM164267v1	43.30	3e-45
BBTA_RS14640	Bradyrhizobium_sp._BTAi1_GCF_000015165.1_ASM1516v1	42.72	9e-40	0.0298939310955798	cobT	nicotinate-nucleotide--dimethylbenzimidazole phosphoribosyltransferase
MAFF_RS03355	Mesorhizobium_loti_GCF_000009625.1_ASM962v1	64.77	1e-107	0.0348725933855611	-	nicotinate-nucleotide--dimethylbenzimidazole phosphoribosyltransferase
RHE_RS12485	Rhizobium_etli_GCF_000092045.1_ASM9204v1	100.00	0.0	0.0529364051627225	cobT	nicotinate-nucleotide--dimethylbenzimidazole phosphoribosyltransferase
REMIM1_RS12320	Rhizobium_etli_GCF_000442435.1_ASM44243v1	99.41	0.0	0.0490391086891796	-	nicotinate-nucleotide--dimethylbenzimidazole phosphoribosyltransferase
RL_RS14355	Rhizobium_leguminosarum_GCF_000009265.1_ASM926v1	95.86	0.0	0.0511522223416598	-	MULTISPECIES: nicotinate-nucleotide--dimethylbenzimidazole phosphoribosyltransferase
NGR_c17340	Sinorhizobium_fredii_GCF_000018545.1_ASM1854v1	89.61	4e-175	0.0462392923010257	cobT	nicotinate-nucleotide--dimethylbenzimidazole phosphoribosyltransferase
SMc04214	Sinorhizobium_meliloti_GCF_000006965.1_ASM696v1	89.35	6e-176	0.0340768604909181	cobT	nicotinate-nucleotide--dimethylbenzimidazole phosphoribosyltransferase
AZC_RS20055	Azorhizobium_caulinodans_GCF_000010525.1_ASM1052v1	64.18	3e-119	0.0337469497949224	-	nicotinate-nucleotide--dimethylbenzimidazole phosphoribosyltransferase
/home/htaboada/sp27/red_etli/bin/footprint_discovery_enero_2018/etli_23_Feb_2018/Rhizobiales/Rhizobium_etli_GCF_000092045.1_ASM9204v1/RHE_RS20960/RHE_RS20960_Rhizobium_etli_GCF_000092045.1_ASM9204v1_Rhizobiales_taxfreq_ortho_bbh.tab
AAV28_RS41005	Bradyrhizobium_diazoefficiens_GCF_001642675.1_ASM164267v1	79.07	0.0	0.0366965389369592	-	MULTISPECIES: aspartate-semialdehyde dehydrogenase
BBTA_RS01660	Bradyrhizobium_sp._BTAi1_GCF_000015165.1_ASM1516v1	79.94	0.0	0.0484412606074359	-	aspartate-semialdehyde dehydrogenase
MAFF_RS18135	Mesorhizobium_loti_GCF_000009625.1_ASM962v1	82.85	0.0	0.0407522748284755	-	MULTISPECIES: aspartate-semialdehyde dehydrogenase
RHE_RS20960	Rhizobium_etli_GCF_000092045.1_ASM9204v1	100.00	0.0	0.0526518008338907	-	aspartate-semialdehyde dehydrogenase
REMIM1_RS20835	Rhizobium_etli_GCF_000442435.1_ASM44243v1	99.71	0.0	0.0487889091550512	-	MULTISPECIES: aspartate-semialdehyde dehydrogenase
RL_RS24260	Rhizobium_leguminosarum_GCF_000009265.1_ASM926v1	97.09	0.0	0.0459628664519262	-	aspartate-semialdehyde dehydrogenase
NGR_c33220	Sinorhizobium_fredii_GCF_000018545.1_ASM1854v1	92.73	0.0	0.0512595583222799	-	aspartate-semialdehyde dehydrogenase
SMc04410	Sinorhizobium_meliloti_GCF_000006965.1_ASM696v1	90.70	0.0	0.0575872526125593	asd	aspartate-semialdehyde dehydrogenase
AZC_RS19225	Azorhizobium_caulinodans_GCF_000010525.1_ASM1052v1	78.20	0.0	0.0746326774310783	-	aspartate-semialdehyde dehydrogenase
/home/htaboada/sp27/red_etli/bin/footprint_discovery_enero_2018/etli_23_Feb_2018/Rhizobiales/Rhizobium_etli_GCF_000092045.1_ASM9204v1/RHE_RS14860/RHE_RS14860_Rhizobium_etli_GCF_000092045.1_ASM9204v1_Rhizobiales_taxfreq_ortho_bbh.tab
AAV28_RS24745	Bradyrhizobium_diazoefficiens_GCF_001642675.1_ASM164267v1	56.62	1e-103
BBTA_RS13485	Bradyrhizobium_sp._BTAi1_GCF_000015165.1_ASM1516v1	52.56	9e-88	0.069825240515223	-	ABC transporter permease
MAFF_RS34300	Mesorhizobium_loti_GCF_000009625.1_ASM962v1	82.65	9e-157	0.0474429468152401	-	ABC transporter permease
RHE_RS14860	Rhizobium_etli_GCF_000092045.1_ASM9204v1	100.00	0.0	0.0526518008338907	-	ABC transporter permease
REMIM1_RS14700	Rhizobium_etli_GCF_000442435.1_ASM44243v1	99.01	0.0	0.0505403058939504	-	ABC transporter permease
RL_RS17340	Rhizobium_leguminosarum_GCF_000009265.1_ASM926v1	93.75	0.0	0.0607895975654507	-	ABC transporter permease
NGR_b12820	Sinorhizobium_fredii_GCF_000018545.1_ASM1854v1	83.88	1e-161	0.0689626016603869	-	spermidine
/home/htaboada/sp27/red_etli/bin/footprint_discovery_enero_2018/etli_23_Feb_2018/Rhizobiales/Rhizobium_etli_GCF_000092045.1_ASM9204v1/RHE_RS10215/RHE_RS10215_Rhizobium_etli_GCF_000092045.1_ASM9204v1_Rhizobiales_taxfreq_ortho_bbh.tab
RHE_RS10215	Rhizobium_etli_GCF_000092045.1_ASM9204v1	100.00	6e-135	0.0526518008338907	-	recombinase family protein
/home/htaboada/sp27/red_etli/bin/footprint_discovery_enero_2018/etli_23_Feb_2018/Rhizobiales/Rhizobium_etli_GCF_000092045.1_ASM9204v1/RHE_RS24300/RHE_RS24300_Rhizobium_etli_GCF_000092045.1_ASM9204v1_Rhizobiales_taxfreq_ortho_bbh.tab
MAFF_RS29440	Mesorhizobium_loti_GCF_000009625.1_ASM962v1	62.18	3e-129	0.018652782508556	-	3-carboxy-cis,cis-muconate cycloisomerase
RHE_RS24300	Rhizobium_etli_GCF_000092045.1_ASM9204v1	100.00	0.0	0.0523671965050588	-	3-carboxy-cis,cis-muconate cycloisomerase
REMIM1_RS24510	Rhizobium_etli_GCF_000442435.1_ASM44243v1	99.43	0.0	0.0467873128820234	-	3-carboxy-cis,cis-muconate cycloisomerase
RL_RS30185	Rhizobium_leguminosarum_GCF_000009265.1_ASM926v1	83.86	0.0	0.0448508616184118	-	3-carboxy-cis,cis-muconate cycloisomerase
NGR_b21200	Sinorhizobium_fredii_GCF_000018545.1_ASM1854v1	66.19	3e-140	0.0560155998160997	pcaB	3-carboxy-cis,cis-muconate cycloisomerase (plasmid)
SM_b20575	Sinorhizobium_meliloti_GCF_000006965.1_ASM696v1	64.18	8e-143	0.038039286129397	pcaB	3-carboxy-cis,cis-muconate cycloisomerase (plasmid)
AZC_RS07420	Azorhizobium_caulinodans_GCF_000010525.1_ASM1052v1	61.56	5e-128	0.0681428793935933	-	3-carboxy-cis,cis-muconate cycloisomerase
/home/htaboada/sp27/red_etli/bin/footprint_discovery_enero_2018/etli_23_Feb_2018/Rhizobiales/Rhizobium_etli_GCF_000092045.1_ASM9204v1/RHE_RS18720/RHE_RS18720_Rhizobium_etli_GCF_000092045.1_ASM9204v1_Rhizobiales_taxfreq_ortho_bbh.tab
MAFF_RS22035	Mesorhizobium_loti_GCF_000009625.1_ASM962v1	73.80	7e-168	0.0494704231748658	-	ABC transporter ATP-binding protein
RHE_RS18720	Rhizobium_etli_GCF_000092045.1_ASM9204v1	100.00	0.0	0.0523671965050588	-	ABC transporter ATP-binding protein
REMIM1_RS18490	Rhizobium_etli_GCF_000442435.1_ASM44243v1	99.70	0.0	0.0417833221994541	-	ABC transporter ATP-binding protein
RL_RS21610	Rhizobium_leguminosarum_GCF_000009265.1_ASM926v1	91.16	0.0	0.0548589051200409	-	ABC transporter ATP-binding protein
NGR_c21700	Sinorhizobium_fredii_GCF_000018545.1_ASM1854v1	72.59	8e-160	0.0602431922550507	-	ABC transporter ATP-binding protein
SMc01653	Sinorhizobium_meliloti_GCF_000006965.1_ASM696v1	71.08	2e-157	0.0610213548325743	-	ABC transporter ATP-binding protein
/home/htaboada/sp27/red_etli/bin/footprint_discovery_enero_2018/etli_23_Feb_2018/Rhizobiales/Rhizobium_etli_GCF_000092045.1_ASM9204v1/RHE_RS17305/RHE_RS17305_Rhizobium_etli_GCF_000092045.1_ASM9204v1_Rhizobiales_taxfreq_ortho_bbh.tab
RHE_RS17305	Rhizobium_etli_GCF_000092045.1_ASM9204v1	100.00	7e-164	0.052082592176227	-	Crp/Fnr family transcriptional regulator
REMIM1_RS17070	Rhizobium_etli_GCF_000442435.1_ASM44243v1	100.00	8e-164	0.0465371133478949	-	Crp/Fnr family transcriptional regulator
RL_RS19690	Rhizobium_leguminosarum_GCF_000009265.1_ASM926v1	93.06	2e-152	0.0444801933405737	-	Crp
/home/htaboada/sp27/red_etli/bin/footprint_discovery_enero_2018/etli_23_Feb_2018/Rhizobiales/Rhizobium_etli_GCF_000092045.1_ASM9204v1/RHE_RS17120/RHE_RS17120_Rhizobium_etli_GCF_000092045.1_ASM9204v1_Rhizobiales_taxfreq_ortho_bbh.tab
AAV28_RS15850	Bradyrhizobium_diazoefficiens_GCF_001642675.1_ASM164267v1	75.17	0.0
BBTA_RS07510	Bradyrhizobium_sp._BTAi1_GCF_000015165.1_ASM1516v1	75.76	0.0	0.0480048528542158	-	multidrug efflux RND transporter permease subunit
MAFF_RS13910	Mesorhizobium_loti_GCF_000009625.1_ASM962v1	52.58	0.0
RHE_RS17120	Rhizobium_etli_GCF_000092045.1_ASM9204v1	100.00	0.0	0.052082592176227	-	multidrug efflux RND transporter permease subunit
REMIM1_RS16885	Rhizobium_etli_GCF_000442435.1_ASM44243v1	99.91	0.0	0.046036714279638	-	multidrug efflux RND transporter permease subunit
RL_RS19460	Rhizobium_leguminosarum_GCF_000009265.1_ASM926v1	96.72	0.0
NGR_c00620	Sinorhizobium_fredii_GCF_000018545.1_ASM1854v1	80.57	0.0	0.0422759243895092	-	AcrB
SMc01095	Sinorhizobium_meliloti_GCF_000006965.1_ASM696v1	80.48	0.0
AZC_RS13795	Azorhizobium_caulinodans_GCF_000010525.1_ASM1052v1	77.67	0.0
/home/htaboada/sp27/red_etli/bin/footprint_discovery_enero_2018/etli_23_Feb_2018/Rhizobiales/Rhizobium_etli_GCF_000092045.1_ASM9204v1/RHE_RS02760/RHE_RS02760_Rhizobium_etli_GCF_000092045.1_ASM9204v1_Rhizobiales_taxfreq_ortho_bbh.tab
AAV28_RS35030	Bradyrhizobium_diazoefficiens_GCF_001642675.1_ASM164267v1	50.98	5e-51	0.0261616473761097	-	MULTISPECIES: carboxymuconolactone decarboxylase family protein
MAFF_RS07670	Mesorhizobium_loti_GCF_000009625.1_ASM962v1	50.66	1e-47
RHE_RS02760	Rhizobium_etli_GCF_000092045.1_ASM9204v1	100.00	9e-105	0.052082592176227	-	carboxymuconolactone decarboxylase family protein
REMIM1_RS03160	Rhizobium_etli_GCF_000442435.1_ASM44243v1	100.00	1e-104	0.0390311273240409	-	carboxymuconolactone decarboxylase family protein
RL_RS03040	Rhizobium_leguminosarum_GCF_000009265.1_ASM926v1	95.42	1e-100	0.0296534622270491	-	MULTISPECIES: carboxymuconolactone decarboxylase family protein
SMc02239	Sinorhizobium_meliloti_GCF_000006965.1_ASM696v1	75.82	7e-76	0.0383034478386289	-	hypothetical protein SMc02239
/home/htaboada/sp27/red_etli/bin/footprint_discovery_enero_2018/etli_23_Feb_2018/Rhizobiales/Rhizobium_etli_GCF_000092045.1_ASM9204v1/RHE_RS07245/RHE_RS07245_Rhizobium_etli_GCF_000092045.1_ASM9204v1_Rhizobiales_taxfreq_ortho_bbh.tab
AAV28_RS15430	Bradyrhizobium_diazoefficiens_GCF_001642675.1_ASM164267v1	64.33	0.0	0.0451244521856388	-	MULTISPECIES: citramalate synthase
BBTA_RS16365	Bradyrhizobium_sp._BTAi1_GCF_000015165.1_ASM1516v1	65.28	0.0
MAFF_RS31755	Mesorhizobium_loti_GCF_000009625.1_ASM962v1	77.61	0.0
RHE_RS07245	Rhizobium_etli_GCF_000092045.1_ASM9204v1	100.00	0.0	0.0517979878473952	-	citramalate synthase
REMIM1_RS07420	Rhizobium_etli_GCF_000442435.1_ASM44243v1	100.00	0.0	0.0537928998376205	-	citramalate synthase
RL_RS07980	Rhizobium_leguminosarum_GCF_000009265.1_ASM926v1	97.21	0.0	0.0556002416757172	-	citramalate synthase
NGR_c08670	Sinorhizobium_fredii_GCF_000018545.1_ASM1854v1	80.78	0.0	0.0486173130479356	-	alpha-isopropylmalate
SMc02546	Sinorhizobium_meliloti_GCF_000006965.1_ASM696v1	81.34	0.0	0.0401525798032524	leuA2	alpha-isopropylmalate
AZC_RS09265	Azorhizobium_caulinodans_GCF_000010525.1_ASM1052v1	63.31	0.0
/home/htaboada/sp27/red_etli/bin/footprint_discovery_enero_2018/etli_23_Feb_2018/Rhizobiales/Rhizobium_etli_GCF_000092045.1_ASM9204v1/RHE_RS19685/RHE_RS19685_Rhizobium_etli_GCF_000092045.1_ASM9204v1_Rhizobiales_taxfreq_ortho_bbh.tab
MAFF_RS07755	Mesorhizobium_loti_GCF_000009625.1_ASM962v1	47.36	0.0	0.0371028173811493	-	outer membrane protein assembly factor
RHE_RS19685	Rhizobium_etli_GCF_000092045.1_ASM9204v1	100.00	0.0	0.0515133835185633	-	outer membrane protein assembly factor
REMIM1_RS19450	Rhizobium_etli_GCF_000442435.1_ASM44243v1	99.20	0.0	0.0435347189383533	-	outer membrane protein assembly factor
RL_RS22600	Rhizobium_leguminosarum_GCF_000009265.1_ASM926v1	93.16	0.0	0.0307654670605635	-	outer membrane protein assembly factor
NGR_c30780	Sinorhizobium_fredii_GCF_000018545.1_ASM1854v1	62.58	0.0	0.0404263526974682	-	cell surface protein
SMc03097	Sinorhizobium_meliloti_GCF_000006965.1_ASM696v1	63.43	0.0	0.0372468010017012	-	hypothetical protein SMc03097
AZC_RS03865	Azorhizobium_caulinodans_GCF_000010525.1_ASM1052v1	36.79	8e-101	0.129795960749701	-	outer membrane protein assembly factor
/home/htaboada/sp27/red_etli/bin/footprint_discovery_enero_2018/etli_23_Feb_2018/Rhizobiales/Rhizobium_etli_GCF_000092045.1_ASM9204v1/RHE_RS08935/RHE_RS08935_Rhizobium_etli_GCF_000092045.1_ASM9204v1_Rhizobiales_taxfreq_ortho_bbh.tab
AAV28_RS40210	Bradyrhizobium_diazoefficiens_GCF_001642675.1_ASM164267v1	69.32	0.0
BBTA_RS02700	Bradyrhizobium_sp._BTAi1_GCF_000015165.1_ASM1516v1	69.09	0.0
MAFF_RS33740	Mesorhizobium_loti_GCF_000009625.1_ASM962v1	75.00	0.0	0.0223022399558821	-	homogentisate 1,2-dioxygenase
RHE_RS08935	Rhizobium_etli_GCF_000092045.1_ASM9204v1	100.00	0.0	0.0512287791897315	-	homogentisate 1,2-dioxygenase
REMIM1_RS09100	Rhizobium_etli_GCF_000442435.1_ASM44243v1	99.77	0.0	0.0392813268581694	-	homogentisate 1,2-dioxygenase
RL_RS09705	Rhizobium_leguminosarum_GCF_000009265.1_ASM926v1	95.42	0.0	0.0363254912281352	-	homogentisate 1,2-dioxygenase
NGR_c29980	Sinorhizobium_fredii_GCF_000018545.1_ASM1854v1	83.26	0.0	0.0216664112496235	hmgA	homogentisate 1,2-dioxygenase
SMc03208	Sinorhizobium_meliloti_GCF_000006965.1_ASM696v1	84.76	0.0	0.024038715540105	hmgA	homogentisate 1,2-dioxygenase
/home/htaboada/sp27/red_etli/bin/footprint_discovery_enero_2018/etli_23_Feb_2018/Rhizobiales/Rhizobium_etli_GCF_000092045.1_ASM9204v1/RHE_RS18655/RHE_RS18655_Rhizobium_etli_GCF_000092045.1_ASM9204v1_Rhizobiales_taxfreq_ortho_bbh.tab
AAV28_RS02460	Bradyrhizobium_diazoefficiens_GCF_001642675.1_ASM164267v1	60.05	0.0
BBTA_RS12635	Bradyrhizobium_sp._BTAi1_GCF_000015165.1_ASM1516v1	63.36	0.0
MAFF_RS20635	Mesorhizobium_loti_GCF_000009625.1_ASM962v1	80.50	0.0	0.0340616028417109	-	xylose isomerase
RHE_RS18655	Rhizobium_etli_GCF_000092045.1_ASM9204v1	100.00	0.0	0.0509441748608996	xylA	xylose isomerase
REMIM1_RS18425	Rhizobium_etli_GCF_000442435.1_ASM44243v1	99.77	0.0	0.0547936979741344	-	xylose isomerase
RL_RS21535	Rhizobium_leguminosarum_GCF_000009265.1_ASM926v1	96.33	0.0	0.0289121256713729	-	xylose isomerase
NGR_c29480	Sinorhizobium_fredii_GCF_000018545.1_ASM1854v1	89.22	0.0	0.0562798243435342	xylA	xylose isomerase
SMc03163	Sinorhizobium_meliloti_GCF_000006965.1_ASM696v1	88.76	0.0	0.0528323418463847	xylA	xylose isomerase
/home/htaboada/sp27/red_etli/bin/footprint_discovery_enero_2018/etli_23_Feb_2018/Rhizobiales/Rhizobium_etli_GCF_000092045.1_ASM9204v1/RHE_RS15965/RHE_RS15965_Rhizobium_etli_GCF_000092045.1_ASM9204v1_Rhizobiales_taxfreq_ortho_bbh.tab
AAV28_RS03975	Bradyrhizobium_diazoefficiens_GCF_001642675.1_ASM164267v1	64.37	0.0	0.0537279469603326	-	MULTISPECIES: glycerol kinase
BBTA_RS33105	Bradyrhizobium_sp._BTAi1_GCF_000015165.1_ASM1516v1	64.37	0.0
MAFF_RS03970	Mesorhizobium_loti_GCF_000009625.1_ASM962v1	75.15	0.0	0.0460237133635022	-	glycerol kinase
RHE_RS15965	Rhizobium_etli_GCF_000092045.1_ASM9204v1	100.00	0.0	0.050374966203236	glpK	glycerol kinase
REMIM1_RS15720	Rhizobium_etli_GCF_000442435.1_ASM44243v1	99.80	0.0	0.0405323245288117	-	glycerol kinase
RL_RS18375	Rhizobium_leguminosarum_GCF_000009265.1_ASM926v1	94.37	0.0	0.0378081643394877	-	glycerol kinase
NGR_c23840	Sinorhizobium_fredii_GCF_000018545.1_ASM1854v1	78.14	0.0	0.0718690714621657	glpK	glycerol kinase
SM_b21009	Sinorhizobium_meliloti_GCF_000006965.1_ASM696v1	79.35	0.0	0.0633988102156616	glpK	glycerol kinase (plasmid)
AZC_RS14020	Azorhizobium_caulinodans_GCF_000010525.1_ASM1052v1	47.59	6e-149
/home/htaboada/sp27/red_etli/bin/footprint_discovery_enero_2018/etli_23_Feb_2018/Rhizobiales/Rhizobium_etli_GCF_000092045.1_ASM9204v1/RHE_RS06795/RHE_RS06795_Rhizobium_etli_GCF_000092045.1_ASM9204v1_Rhizobiales_taxfreq_ortho_bbh.tab
AAV28_RS02940	Bradyrhizobium_diazoefficiens_GCF_001642675.1_ASM164267v1	40.74	5e-07	0.0245814136419822	-	MULTISPECIES: DUF2147 domain-containing protein
BBTA_RS26645	Bradyrhizobium_sp._BTAi1_GCF_000015165.1_ASM1516v1	34.65	9e-09
MAFF_RS31435	Mesorhizobium_loti_GCF_000009625.1_ASM962v1	54.84	7e-30	0.034467098113636	-	DUF2147 domain-containing protein
RHE_RS06795	Rhizobium_etli_GCF_000092045.1_ASM9204v1	100.00	2e-64	0.050374966203236	-	DUF2147 domain-containing protein
REMIM1_RS06970	Rhizobium_etli_GCF_000442435.1_ASM44243v1	99.11	2e-64	0.0492893082233081	-	MULTISPECIES: DUF2147 domain-containing protein
RL_RS07680	Rhizobium_leguminosarum_GCF_000009265.1_ASM926v1	90.22	4e-59	0.0329894767275922	-	DUF2147 domain-containing protein
NGR_c08080	Sinorhizobium_fredii_GCF_000018545.1_ASM1854v1	76.92	3e-50	0.0351418621487795	-	hypothetical protein NGR_c08080
SMc02391	Sinorhizobium_meliloti_GCF_000006965.1_ASM696v1	68.13	2e-45	0.037775124420165	-	hypothetical protein SMc02391
/home/htaboada/sp27/red_etli/bin/footprint_discovery_enero_2018/etli_23_Feb_2018/Rhizobiales/Rhizobium_etli_GCF_000092045.1_ASM9204v1/RHE_RS19980/RHE_RS19980_Rhizobium_etli_GCF_000092045.1_ASM9204v1_Rhizobiales_taxfreq_ortho_bbh.tab
MAFF_RS17510	Mesorhizobium_loti_GCF_000009625.1_ASM962v1	34.98	1e-24	0.018652782508556	-	tail protein
RHE_RS19980	Rhizobium_etli_GCF_000092045.1_ASM9204v1	100.00	0.0	0.0500903618744041	-	membrane protein
REMIM1_RS19750	Rhizobium_etli_GCF_000442435.1_ASM44243v1	99.75	0.0	0.0467873128820234	-	hypothetical protein
RL_RS23175	Rhizobium_leguminosarum_GCF_000009265.1_ASM926v1	80.77	1e-171	0.042256183673545	-	membrane protein
NGR_c32090	Sinorhizobium_fredii_GCF_000018545.1_ASM1854v1	40.33	9e-50	0.0438612715541158	-	hypothetical protein NGR_c32090
SMc03233	Sinorhizobium_meliloti_GCF_000006965.1_ASM696v1	42.42	5e-48	0.0404167415124843	-	hypothetical protein SMc03233
/home/htaboada/sp27/red_etli/bin/footprint_discovery_enero_2018/etli_23_Feb_2018/Rhizobiales/Rhizobium_etli_GCF_000092045.1_ASM9204v1/RHE_RS13730/RHE_RS13730_Rhizobium_etli_GCF_000092045.1_ASM9204v1_Rhizobiales_taxfreq_ortho_bbh.tab
RHE_RS13730	Rhizobium_etli_GCF_000092045.1_ASM9204v1	100.00	0.0	0.0498057575455723	-	ferrichrome ABC transporter substrate-binding protein
REMIM1_RS13565	Rhizobium_etli_GCF_000442435.1_ASM44243v1	100.00	0.0	0.0477881110185373	-	ferrichrome ABC transporter substrate-binding protein
AZC_RS00935	Azorhizobium_caulinodans_GCF_000010525.1_ASM1052v1	33.33	7e-08	0.0142775556824672	-	preprotein translocase subunit YidC
/home/htaboada/sp27/red_etli/bin/footprint_discovery_enero_2018/etli_23_Feb_2018/Rhizobiales/Rhizobium_etli_GCF_000092045.1_ASM9204v1/RHE_RS25550/RHE_RS25550_Rhizobium_etli_GCF_000092045.1_ASM9204v1_Rhizobiales_taxfreq_ortho_bbh.tab
MAFF_RS23375	Mesorhizobium_loti_GCF_000009625.1_ASM962v1	74.42	0.0	0.0356835839294114	-	sugar isomerase
RHE_RS25550	Rhizobium_etli_GCF_000092045.1_ASM9204v1	100.00	0.0	0.0495211532167404	rhaI	L-rhamnose catabolism isomerase
REMIM1_RS25795	Rhizobium_etli_GCF_000442435.1_ASM44243v1	100.00	0.0	0.0447857166089957	-	L-rhamnose catabolism isomerase
RL_RS31865	Rhizobium_leguminosarum_GCF_000009265.1_ASM926v1	93.95	0.0	0.042256183673545	-	L-rhamnose catabolism isomerase
NGR_c02420	Sinorhizobium_fredii_GCF_000018545.1_ASM1854v1	79.33	0.0
SMc02321	Sinorhizobium_meliloti_GCF_000006965.1_ASM696v1	79.14	0.0
/home/htaboada/sp27/red_etli/bin/footprint_discovery_enero_2018/etli_23_Feb_2018/Rhizobiales/Rhizobium_etli_GCF_000092045.1_ASM9204v1/RHE_RS17310/RHE_RS17310_Rhizobium_etli_GCF_000092045.1_ASM9204v1_Rhizobiales_taxfreq_ortho_bbh.tab
BBTA_RS04880	Bradyrhizobium_sp._BTAi1_GCF_000015165.1_ASM1516v1	57.89	3e-66	0.078989803332846	-	sugar transferase
MAFF_RS21505	Mesorhizobium_loti_GCF_000009625.1_ASM962v1	53.92	1e-65	0.0369000697451868	-	exopolysaccharide biosynthesis protein
RHE_RS17310	Rhizobium_etli_GCF_000092045.1_ASM9204v1	100.00	2e-159	0.0495211532167404	-	exopolysaccharide biosynthesis protein
REMIM1_RS17075	Rhizobium_etli_GCF_000442435.1_ASM44243v1	100.00	2e-159	0.0450359161431241	-	exopolysaccharide biosynthesis protein
RL_RS19695	Rhizobium_leguminosarum_GCF_000009265.1_ASM926v1	88.41	6e-145	0.029282793949211	-	exopolysaccharide biosynthesis protein
NGR_b18270	Sinorhizobium_fredii_GCF_000018545.1_ASM1854v1	56.59	8e-73	0.0417474753346404	exoY2	exopolysaccharide production protein ExoY (plasmid)
SM_b20946	Sinorhizobium_meliloti_GCF_000006965.1_ASM696v1	54.15	2e-70	0.0372468010017012	exoY	galactosyltransferase (plasmid)
/home/htaboada/sp27/red_etli/bin/footprint_discovery_enero_2018/etli_23_Feb_2018/Rhizobiales/Rhizobium_etli_GCF_000092045.1_ASM9204v1/RHE_RS10265/RHE_RS10265_Rhizobium_etli_GCF_000092045.1_ASM9204v1_Rhizobiales_taxfreq_ortho_bbh.tab
AAV28_RS06265	Bradyrhizobium_diazoefficiens_GCF_001642675.1_ASM164267v1	36.95	2e-83	0.0361697943589167	-	MULTISPECIES: chromosome partitioning protein ParB
BBTA_RS15595	Bradyrhizobium_sp._BTAi1_GCF_000015165.1_ASM1516v1	32.29	1e-48	0.0477866489776057	-	hypothetical protein
MAFF_RS00865	Mesorhizobium_loti_GCF_000009625.1_ASM962v1	35.87	2e-79
RHE_RS10265	Rhizobium_etli_GCF_000092045.1_ASM9204v1	100.00	0.0	0.0495211532167404	-	ParB/RepB/Spo0J family partition protein
REMIM1_RS26685	Rhizobium_etli_GCF_000442435.1_ASM44243v1	35.94	6e-85	0.0392813268581694	-	chromosome partitioning protein ParB
RL_RS24430	Rhizobium_leguminosarum_GCF_000009265.1_ASM926v1	35.40	5e-80	0.0322481401719159	-	DNA-binding protein
AZC_RS19750	Azorhizobium_caulinodans_GCF_000010525.1_ASM1052v1	38.23	5e-83	0.0668449197860962	-	DNA-binding protein
/home/htaboada/sp27/red_etli/bin/footprint_discovery_enero_2018/etli_23_Feb_2018/Rhizobiales/Rhizobium_etli_GCF_000092045.1_ASM9204v1/RHE_RS09725/RHE_RS09725_Rhizobium_etli_GCF_000092045.1_ASM9204v1_Rhizobiales_taxfreq_ortho_bbh.tab
AAV28_RS24795	Bradyrhizobium_diazoefficiens_GCF_001642675.1_ASM164267v1	64.71	4e-26	0.026512810428138	-	MULTISPECIES: DUF3126 domain-containing protein
BBTA_RS24465	Bradyrhizobium_sp._BTAi1_GCF_000015165.1_ASM1516v1	64.71	3e-26	0.0794262110860662	-	MULTISPECIES: DUF3126 domain-containing protein
MAFF_RS01755	Mesorhizobium_loti_GCF_000009625.1_ASM962v1	73.13	1e-29	0.0332506122978606	-	DUF3126 domain-containing protein
RHE_RS09725	Rhizobium_etli_GCF_000092045.1_ASM9204v1	100.00	4e-45	0.0492365488879086	-	MULTISPECIES: DUF3126 domain-containing protein
REMIM1_RS09890	Rhizobium_etli_GCF_000442435.1_ASM44243v1	100.00	4e-45	0.0470375124161519	-	MULTISPECIES: DUF3126 domain-containing protein
RL_RS11455	Rhizobium_leguminosarum_GCF_000009265.1_ASM926v1	95.52	1e-43	0.0307654670605635	-	MULTISPECIES: DUF3126 domain-containing protein
SMc02112	Sinorhizobium_meliloti_GCF_000006965.1_ASM696v1	71.64	5e-33	0.0338126987816862	-	hypothetical protein SMc02112
AZC_RS17790	Azorhizobium_caulinodans_GCF_000010525.1_ASM1052v1	60.29	2e-25
/home/htaboada/sp27/red_etli/bin/footprint_discovery_enero_2018/etli_23_Feb_2018/Rhizobiales/Rhizobium_etli_GCF_000092045.1_ASM9204v1/RHE_RS19010/RHE_RS19010_Rhizobium_etli_GCF_000092045.1_ASM9204v1_Rhizobiales_taxfreq_ortho_bbh.tab
RHE_RS19010	Rhizobium_etli_GCF_000092045.1_ASM9204v1	100.00	9e-51	0.0486673402302449	-	MULTISPECIES: glutaredoxin-like protein NrdH
REMIM1_RS18780	Rhizobium_etli_GCF_000442435.1_ASM44243v1	100.00	2e-46	0.0427841203359679	-	glutaredoxin-like protein NrdH
RL_RS21960	Rhizobium_leguminosarum_GCF_000009265.1_ASM926v1	94.52	1e-48	0.0192747504475819	-	glutaredoxin-like protein NrdH
/home/htaboada/sp27/red_etli/bin/footprint_discovery_enero_2018/etli_23_Feb_2018/Rhizobiales/Rhizobium_etli_GCF_000092045.1_ASM9204v1/RHE_RS03675/RHE_RS03675_Rhizobium_etli_GCF_000092045.1_ASM9204v1_Rhizobiales_taxfreq_ortho_bbh.tab
RHE_RS03675	Rhizobium_etli_GCF_000092045.1_ASM9204v1	100.00	0.0	0.0486673402302449	traA	Ti-type conjugative transfer relaxase TraA
REMIM1_RS22245	Rhizobium_etli_GCF_000442435.1_ASM44243v1	78.88	0.0	0.0205163617985343	-	Ti-type conjugative transfer relaxase TraA
RL_RS04050	Rhizobium_leguminosarum_GCF_000009265.1_ASM926v1	75.42	0.0	0.0344721498389446	-	Ti-type conjugative transfer relaxase TraA
NGR_b10550	Sinorhizobium_fredii_GCF_000018545.1_ASM1854v1	70.71	0.0
SM_b21087	Sinorhizobium_meliloti_GCF_000006965.1_ASM696v1	73.24	0.0
/home/htaboada/sp27/red_etli/bin/footprint_discovery_enero_2018/etli_23_Feb_2018/Rhizobiales/Rhizobium_etli_GCF_000092045.1_ASM9204v1/RHE_RS00185/RHE_RS00185_Rhizobium_etli_GCF_000092045.1_ASM9204v1_Rhizobiales_taxfreq_ortho_bbh.tab
AAV28_RS37755	Bradyrhizobium_diazoefficiens_GCF_001642675.1_ASM164267v1	77.05	3e-121	0.029848859422407	-	MULTISPECIES: DNA-binding response regulator
BBTA_RS34480	Bradyrhizobium_sp._BTAi1_GCF_000015165.1_ASM1516v1	77.78	6e-122
MAFF_RS20880	Mesorhizobium_loti_GCF_000009625.1_ASM962v1	85.60	9e-136	0.0405495271925129	-	MULTISPECIES: DNA-binding response regulator
RHE_RS00185	Rhizobium_etli_GCF_000092045.1_ASM9204v1	100.00	8e-155	0.0486673402302449	-	DNA-binding response regulator
REMIM1_RS00625	Rhizobium_etli_GCF_000442435.1_ASM44243v1	100.00	9e-155	0.0482885100867942	-	DNA-binding response regulator
RL_RS00180	Rhizobium_leguminosarum_GCF_000009265.1_ASM926v1	92.43	4e-153	0.0448508616184118	-	MULTISPECIES: DNA-binding response regulator
NGR_c33930	Sinorhizobium_fredii_GCF_000018545.1_ASM1854v1	88.57	1e-138	0.0438612715541158	-	two component signal transduction response regulator protein
SMc02560	Sinorhizobium_meliloti_GCF_000006965.1_ASM696v1	88.57	1e-139	0.0393600946755566	chvI	transcriptional regulator
AZC_RS20845	Azorhizobium_caulinodans_GCF_000010525.1_ASM1052v1	74.59	2e-125
/home/htaboada/sp27/red_etli/bin/footprint_discovery_enero_2018/etli_23_Feb_2018/Rhizobiales/Rhizobium_etli_GCF_000092045.1_ASM9204v1/RHE_RS17785/RHE_RS17785_Rhizobium_etli_GCF_000092045.1_ASM9204v1_Rhizobiales_taxfreq_ortho_bbh.tab
AAV28_RS04605	Bradyrhizobium_diazoefficiens_GCF_001642675.1_ASM164267v1	65.85	2e-77	0.0521477132262052	-	MULTISPECIES: Holliday junction branch migration protein RuvA
BBTA_RS32345	Bradyrhizobium_sp._BTAi1_GCF_000015165.1_ASM1516v1	64.39	1e-74
MAFF_RS16350	Mesorhizobium_loti_GCF_000009625.1_ASM962v1	76.21	2e-88	0.0356835839294114	-	Holliday junction branch migration protein RuvA
RHE_RS17785	Rhizobium_etli_GCF_000092045.1_ASM9204v1	100.00	9e-126	0.0483827359014131	-	Holliday junction branch migration protein RuvA
REMIM1_RS17550	Rhizobium_etli_GCF_000442435.1_ASM44243v1	99.51	3e-125	0.0447857166089957	-	Holliday junction branch migration protein RuvA
RL_RS20575	Rhizobium_leguminosarum_GCF_000009265.1_ASM926v1	95.59	2e-120	0.035584154672459	-	Holliday junction branch migration protein RuvA
NGR_c27920	Sinorhizobium_fredii_GCF_000018545.1_ASM1854v1	83.41	4e-106	0.0657919073311737	ruvA	Holliday junction DNA helicase RuvA
SMc03966	Sinorhizobium_meliloti_GCF_000006965.1_ASM696v1	84.88	3e-106	0.0478132693709781	ruvA	Holliday junction DNA helicase RuvA
AZC_RS02615	Azorhizobium_caulinodans_GCF_000010525.1_ASM1052v1	57.69	2e-67
/home/htaboada/sp27/red_etli/bin/footprint_discovery_enero_2018/etli_23_Feb_2018/Rhizobiales/Rhizobium_etli_GCF_000092045.1_ASM9204v1/RHE_RS24485/RHE_RS24485_Rhizobium_etli_GCF_000092045.1_ASM9204v1_Rhizobiales_taxfreq_ortho_bbh.tab
MAFF_RS26330	Mesorhizobium_loti_GCF_000009625.1_ASM962v1	85.86	0.0	0.0314258835741975	-	periplasmic alpha-galactoside-binding protein
RHE_RS24485	Rhizobium_etli_GCF_000092045.1_ASM9204v1	100.00	0.0	0.0480981315725812	-	periplasmic alpha-galactoside-binding protein
REMIM1_RS24695	Rhizobium_etli_GCF_000442435.1_ASM44243v1	100.00	0.0	0.0427841203359679	-	periplasmic alpha-galactoside-binding protein
RL_RS30985	Rhizobium_leguminosarum_GCF_000009265.1_ASM926v1	94.82	0.0	0.0500402175081454	-	periplasmic alpha-galactoside-binding protein
NGR_b02760	Sinorhizobium_fredii_GCF_000018545.1_ASM1854v1	79.73	0.0	0.043332822499247	-	periplasmic alpha-galactoside-binding protein (plasmid)
SM_b21647	Sinorhizobium_meliloti_GCF_000006965.1_ASM696v1	77.74	0.0	0.0594363845771828	agpA	alpha-galactoside ABC transporter substrate-binding protein precursor (plasmid)
/home/htaboada/sp27/red_etli/bin/footprint_discovery_enero_2018/etli_23_Feb_2018/Rhizobiales/Rhizobium_etli_GCF_000092045.1_ASM9204v1/RHE_RS12175/RHE_RS12175_Rhizobium_etli_GCF_000092045.1_ASM9204v1_Rhizobiales_taxfreq_ortho_bbh.tab
AAV28_RS29545	Bradyrhizobium_diazoefficiens_GCF_001642675.1_ASM164267v1	68.26	0.0	0.0305511855264636	-	MULTISPECIES: class II fumarate hydratase
BBTA_RS28565	Bradyrhizobium_sp._BTAi1_GCF_000015165.1_ASM1516v1	69.50	0.0
MAFF_RS33220	Mesorhizobium_loti_GCF_000009625.1_ASM962v1	86.71	0.0	0.0289929119426467	-	class II fumarate hydratase
RHE_RS12175	Rhizobium_etli_GCF_000092045.1_ASM9204v1	100.00	0.0	0.0480981315725812	fumC	class II fumarate hydratase
REMIM1_RS12010	Rhizobium_etli_GCF_000442435.1_ASM44243v1	99.78	0.0	0.0495395077574366	-	class II fumarate hydratase
RL_RS13950	Rhizobium_leguminosarum_GCF_000009265.1_ASM926v1	95.90	0.0	0.0392908374508401	-	class II fumarate hydratase
NGR_c17050	Sinorhizobium_fredii_GCF_000018545.1_ASM1854v1	86.80	0.0	0.0219306357770579	fumC	fumarate hydratase
SMc00149	Sinorhizobium_meliloti_GCF_000006965.1_ASM696v1	88.31	0.0	0.0446433288601951	fumC	fumarate hydratase
AZC_RS13265	Azorhizobium_caulinodans_GCF_000010525.1_ASM1052v1	82.03	0.0	0.118114324282228	-	class II fumarate hydratase
/home/htaboada/sp27/red_etli/bin/footprint_discovery_enero_2018/etli_23_Feb_2018/Rhizobiales/Rhizobium_etli_GCF_000092045.1_ASM9204v1/RHE_RS11060/RHE_RS11060_Rhizobium_etli_GCF_000092045.1_ASM9204v1_Rhizobiales_taxfreq_ortho_bbh.tab
AAV28_RS19240	Bradyrhizobium_diazoefficiens_GCF_001642675.1_ASM164267v1	61.78	2e-65	0.0426663108214406	-	MULTISPECIES: septal ring lytic transglycosylase RlpA family protein
BBTA_RS19230	Bradyrhizobium_sp._BTAi1_GCF_000015165.1_ASM1516v1	55.49	2e-65	0.0362218435172719	-	septal ring lytic transglycosylase RlpA family protein
MAFF_RS02745	Mesorhizobium_loti_GCF_000009625.1_ASM962v1	50.77	2e-89	0.0403467795565504	-	septal ring lytic transglycosylase RlpA family protein
RHE_RS11060	Rhizobium_etli_GCF_000092045.1_ASM9204v1	100.00	0.0	0.0480981315725812	-	septal ring lytic transglycosylase RlpA family protein
REMIM1_RS10905	Rhizobium_etli_GCF_000442435.1_ASM44243v1	100.00	0.0	0.0482885100867942	-	septal ring lytic transglycosylase RlpA family protein
RL_RS12765	Rhizobium_leguminosarum_GCF_000009265.1_ASM926v1	87.78	0.0	0.0633842755103176	-	septal ring lytic transglycosylase RlpA family protein
NGR_c16090	Sinorhizobium_fredii_GCF_000018545.1_ASM1854v1	56.98	2e-126	0.0401621281700338	-	lipoprotein
SMc01187	Sinorhizobium_meliloti_GCF_000006965.1_ASM696v1	57.95	3e-130	0.0401525798032524	rlpA	rare lipoprotein A
AZC_RS11245	Azorhizobium_caulinodans_GCF_000010525.1_ASM1052v1	50.76	6e-67	0.102538808992264	-	septal ring lytic transglycosylase RlpA family protein
/home/htaboada/sp27/red_etli/bin/footprint_discovery_enero_2018/etli_23_Feb_2018/Rhizobiales/Rhizobium_etli_GCF_000092045.1_ASM9204v1/RHE_RS06865/RHE_RS06865_Rhizobium_etli_GCF_000092045.1_ASM9204v1_Rhizobiales_taxfreq_ortho_bbh.tab
BBTA_RS02335	Bradyrhizobium_sp._BTAi1_GCF_000015165.1_ASM1516v1	57.60	0.0
MAFF_RS20440	Mesorhizobium_loti_GCF_000009625.1_ASM962v1	72.73	0.0	0.0350753410215237	-	3D-(3,5
RHE_RS06865	Rhizobium_etli_GCF_000092045.1_ASM9204v1	100.00	0.0	0.0480981315725812	iolD	3D-(3,5/4)-trihydroxycyclohexane-1,2-dione acylhydrolase (decyclizing)
REMIM1_RS07040	Rhizobium_etli_GCF_000442435.1_ASM44243v1	100.00	0.0	0.0435347189383533	-	3D-(3,5/4)-trihydroxycyclohexane-1,2-dione acylhydrolase (decyclizing)
RL_RS07760	Rhizobium_leguminosarum_GCF_000009265.1_ASM926v1	94.32	0.0	0.0578242513427458	-	3D-(3,5
NGR_c37020	Sinorhizobium_fredii_GCF_000018545.1_ASM1854v1	72.96	0.0
SMc01166	Sinorhizobium_meliloti_GCF_000006965.1_ASM696v1	72.48	0.0	0.0290577880155116	iolD	malonic semialdehyde oxidative decarboxylase
/home/htaboada/sp27/red_etli/bin/footprint_discovery_enero_2018/etli_23_Feb_2018/Rhizobiales/Rhizobium_etli_GCF_000092045.1_ASM9204v1/RHE_RS15980/RHE_RS15980_Rhizobium_etli_GCF_000092045.1_ASM9204v1_Rhizobiales_taxfreq_ortho_bbh.tab
AAV28_RS27720	Bradyrhizobium_diazoefficiens_GCF_001642675.1_ASM164267v1	27.96	1e-51
BBTA_RS09535	Bradyrhizobium_sp._BTAi1_GCF_000015165.1_ASM1516v1	28.32	2e-50
MAFF_RS21035	Mesorhizobium_loti_GCF_000009625.1_ASM962v1	72.55	0.0
RHE_RS15980	Rhizobium_etli_GCF_000092045.1_ASM9204v1	100.00	0.0	0.0478135272437494	xdhB	xanthine dehydrogenase molybdopterin binding subunit
REMIM1_RS15735	Rhizobium_etli_GCF_000442435.1_ASM44243v1	99.49	0.0	0.0325259394367008	-	xanthine dehydrogenase molybdopterin binding subunit
RL_RS18390	Rhizobium_leguminosarum_GCF_000009265.1_ASM926v1	94.61	0.0	0.0429975202292213	-	xanthine dehydrogenase molybdopterin binding subunit
NGR_c23870	Sinorhizobium_fredii_GCF_000018545.1_ASM1854v1	79.41	0.0	0.0541660281240587	xdhB	xanthine dehydrogenase
SM_b20846	Sinorhizobium_meliloti_GCF_000006965.1_ASM696v1	78.64	0.0
AZC_RS15185	Azorhizobium_caulinodans_GCF_000010525.1_ASM1052v1	27.09	8e-43	0.0752816572348269	-	xanthine dehydrogenase family protein molybdopterin-binding subunit
/home/htaboada/sp27/red_etli/bin/footprint_discovery_enero_2018/etli_23_Feb_2018/Rhizobiales/Rhizobium_etli_GCF_000092045.1_ASM9204v1/RHE_RS05950/RHE_RS05950_Rhizobium_etli_GCF_000092045.1_ASM9204v1_Rhizobiales_taxfreq_ortho_bbh.tab
AAV28_RS01445	Bradyrhizobium_diazoefficiens_GCF_001642675.1_ASM164267v1	58.30	2e-96
BBTA_RS09995	Bradyrhizobium_sp._BTAi1_GCF_000015165.1_ASM1516v1	50.37	1e-162	0.018329125635246	-	methyl-accepting chemotaxis protein
RHE_RS05950	Rhizobium_etli_GCF_000092045.1_ASM9204v1	100.00	0.0	0.0478135272437494	-	PAS domain S-box protein
REMIM1_RS06190	Rhizobium_etli_GCF_000442435.1_ASM44243v1	99.83	0.0	0.0380303291875271	-	PAS domain S-box protein
RL_RS33280	Rhizobium_leguminosarum_GCF_000009265.1_ASM926v1	68.34	0.0	0.0148267311135246	-	PAS domain S-box protein
NGR_c30850	Sinorhizobium_fredii_GCF_000018545.1_ASM1854v1	67.09	0.0	0.0364629847859517	-	methyl-accepting chemotaxis protein
SMc03087	Sinorhizobium_meliloti_GCF_000006965.1_ASM696v1	67.84	0.0	0.0451716522786589	mcpY	chemoreceptor methyl-accepting chemotaxis protein
AZC_RS02910	Azorhizobium_caulinodans_GCF_000010525.1_ASM1052v1	40.97	2e-125	0.0928041119360366	-	methyl-accepting chemotaxis protein
/home/htaboada/sp27/red_etli/bin/footprint_discovery_enero_2018/etli_23_Feb_2018/Rhizobiales/Rhizobium_etli_GCF_000092045.1_ASM9204v1/RHE_RS02695/RHE_RS02695_Rhizobium_etli_GCF_000092045.1_ASM9204v1_Rhizobiales_taxfreq_ortho_bbh.tab
AAV28_RS02525	Bradyrhizobium_diazoefficiens_GCF_001642675.1_ASM164267v1	42.39	4e-67	0.0230011799078548	-	MULTISPECIES: ABC transporter substrate-binding protein
BBTA_RS03690	Bradyrhizobium_sp._BTAi1_GCF_000015165.1_ASM1516v1	41.98	6e-66	0.069825240515223	-	ABC transporter substrate-binding protein
MAFF_RS23065	Mesorhizobium_loti_GCF_000009625.1_ASM962v1	47.62	4e-77	0.0547418617098925	-	amino acid ABC transporter
RHE_RS02695	Rhizobium_etli_GCF_000092045.1_ASM9204v1	100.00	0.0	0.0478135272437494	-	ABC transporter substrate-binding protein
REMIM1_RS03095	Rhizobium_etli_GCF_000442435.1_ASM44243v1	100.00	0.0	0.0465371133478949	-	ABC transporter substrate-binding protein
RL_RS02970	Rhizobium_leguminosarum_GCF_000009265.1_ASM926v1	93.15	1e-170	0.06486694862167	-	amino acid ABC transporter
NGR_c01600	Sinorhizobium_fredii_GCF_000018545.1_ASM1854v1	63.71	2e-114	0.0383125564779927	-	extracellular amino acid solute-binding protein
SMc02219	Sinorhizobium_meliloti_GCF_000006965.1_ASM696v1	62.90	4e-110
AZC_RS01935	Azorhizobium_caulinodans_GCF_000010525.1_ASM1052v1	43.95	4e-63	0.161595971133378	-	ABC transporter substrate-binding protein
/home/htaboada/sp27/red_etli/bin/footprint_discovery_enero_2018/etli_23_Feb_2018/Rhizobiales/Rhizobium_etli_GCF_000092045.1_ASM9204v1/RHE_RS29945/RHE_RS29945_Rhizobium_etli_GCF_000092045.1_ASM9204v1_Rhizobiales_taxfreq_ortho_bbh.tab
RHE_RS29945	Rhizobium_etli_GCF_000092045.1_ASM9204v1	100.00	0.0	0.0475289229149175	-	methyl-accepting chemotaxis protein
AZC_RS03675	Azorhizobium_caulinodans_GCF_000010525.1_ASM1052v1	32.99	5e-28
/home/htaboada/sp27/red_etli/bin/footprint_discovery_enero_2018/etli_23_Feb_2018/Rhizobiales/Rhizobium_etli_GCF_000092045.1_ASM9204v1/RHE_RS19725/RHE_RS19725_Rhizobium_etli_GCF_000092045.1_ASM9204v1_Rhizobiales_taxfreq_ortho_bbh.tab
AAV28_RS39925	Bradyrhizobium_diazoefficiens_GCF_001642675.1_ASM164267v1	54.34	1e-89
BBTA_RS14435	Bradyrhizobium_sp._BTAi1_GCF_000015165.1_ASM1516v1	53.31	5e-87
MAFF_RS22085	Mesorhizobium_loti_GCF_000009625.1_ASM962v1	64.68	2e-106
RHE_RS19725	Rhizobium_etli_GCF_000092045.1_ASM9204v1	100.00	0.0	0.0472443185860857	-	formate dehydrogenase accessory sulfurtransferase FdhD
REMIM1_RS19490	Rhizobium_etli_GCF_000442435.1_ASM44243v1	99.64	0.0	0.0507905054280789	-	formate dehydrogenase accessory sulfurtransferase FdhD
RL_RS22645	Rhizobium_leguminosarum_GCF_000009265.1_ASM926v1	91.24	7e-167	0.029282793949211	-	formate dehydrogenase accessory sulfurtransferase FdhD
NGR_c30870	Sinorhizobium_fredii_GCF_000018545.1_ASM1854v1	72.62	4e-125
SMc03085	Sinorhizobium_meliloti_GCF_000006965.1_ASM696v1	72.03	7e-121
AZC_RS17770	Azorhizobium_caulinodans_GCF_000010525.1_ASM1052v1	53.46	2e-87
/home/htaboada/sp27/red_etli/bin/footprint_discovery_enero_2018/etli_23_Feb_2018/Rhizobiales/Rhizobium_etli_GCF_000092045.1_ASM9204v1/RHE_RS11955/RHE_RS11955_Rhizobium_etli_GCF_000092045.1_ASM9204v1_Rhizobiales_taxfreq_ortho_bbh.tab
AAV28_RS26355	Bradyrhizobium_diazoefficiens_GCF_001642675.1_ASM164267v1	28.92	3e-51	0.0366965389369592	-	MULTISPECIES: hypothetical protein
BBTA_RS25940	Bradyrhizobium_sp._BTAi1_GCF_000015165.1_ASM1516v1	26.58	7e-53	0.0552055807823482	-	hypothetical protein
MAFF_RS04310	Mesorhizobium_loti_GCF_000009625.1_ASM962v1	27.71	5e-118	0.0415632653723258	-	kinesin
RHE_RS11955	Rhizobium_etli_GCF_000092045.1_ASM9204v1	100.00	0.0	0.0472443185860857	-	membrane protein
REMIM1_RS11790	Rhizobium_etli_GCF_000442435.1_ASM44243v1	99.78	0.0	0.0410327235970687	-	apolipoprotein type protein
RL_RS13700	Rhizobium_leguminosarum_GCF_000009265.1_ASM926v1	89.34	0.0	0.0470748712854405	-	membrane protein
NGR_c16680	Sinorhizobium_fredii_GCF_000018545.1_ASM1854v1	35.81	0.0	0.0338207395116074	-	kinesin-like protein
SMc00190	Sinorhizobium_meliloti_GCF_000006965.1_ASM696v1	35.10	0.0	0.0361901541647735	-	hypothetical protein SMc00190
AZC_RS11485	Azorhizobium_caulinodans_GCF_000010525.1_ASM1052v1	26.31	2e-152	0.127849021338456	-	hypothetical protein
/home/htaboada/sp27/red_etli/bin/footprint_discovery_enero_2018/etli_23_Feb_2018/Rhizobiales/Rhizobium_etli_GCF_000092045.1_ASM9204v1/RHE_RS20080/RHE_RS20080_Rhizobium_etli_GCF_000092045.1_ASM9204v1_Rhizobiales_taxfreq_ortho_bbh.tab
AAV28_RS37695	Bradyrhizobium_diazoefficiens_GCF_001642675.1_ASM164267v1	34.36	7e-22	0.00913023935273626	-	MULTISPECIES: LysE family translocator
MAFF_RS18030	Mesorhizobium_loti_GCF_000009625.1_ASM962v1	49.74	2e-49	0.0176390443287431	-	MULTISPECIES: LysE family translocator
RHE_RS20080	Rhizobium_etli_GCF_000092045.1_ASM9204v1	100.00	1e-123	0.046675109928422	-	LysE family translocator
REMIM1_RS19850	Rhizobium_etli_GCF_000442435.1_ASM44243v1	100.00	2e-123	0.0382805287216555	-	LysE family translocator
RL_RS23270	Rhizobium_leguminosarum_GCF_000009265.1_ASM926v1	94.71	3e-118	0.0344721498389446	-	LysE family translocator
NGR_c32530	Sinorhizobium_fredii_GCF_000018545.1_ASM1854v1	78.84	4e-98
SMc03827	Sinorhizobium_meliloti_GCF_000006965.1_ASM696v1	77.25	8e-97	0.031171081689367	-	amino acid efflux transmembrane protein
AZC_RS10710	Azorhizobium_caulinodans_GCF_000010525.1_ASM1052v1	36.03	2e-18
/home/htaboada/sp27/red_etli/bin/footprint_discovery_enero_2018/etli_23_Feb_2018/Rhizobiales/Rhizobium_etli_GCF_000092045.1_ASM9204v1/RHE_RS02820/RHE_RS02820_Rhizobium_etli_GCF_000092045.1_ASM9204v1_Rhizobiales_taxfreq_ortho_bbh.tab
AAV28_RS02660	Bradyrhizobium_diazoefficiens_GCF_001642675.1_ASM164267v1	72.14	0.0	0.0208942015956849	-	MULTISPECIES: acetyl-CoA acetyltransferase
BBTA_RS03825	Bradyrhizobium_sp._BTAi1_GCF_000015165.1_ASM1516v1	73.88	0.0	0.0379674745301525	-	acetyl-CoA acetyltransferase
MAFF_RS23030	Mesorhizobium_loti_GCF_000009625.1_ASM962v1	82.84	0.0	0.0340616028417109	-	MULTISPECIES: acetyl-CoA acetyltransferase
RHE_RS02820	Rhizobium_etli_GCF_000092045.1_ASM9204v1	100.00	0.0	0.046675109928422	-	acetyl-CoA acetyltransferase
REMIM1_RS03220	Rhizobium_etli_GCF_000442435.1_ASM44243v1	100.00	0.0	0.0447857166089957	-	acetyl-CoA acetyltransferase
RL_RS03105	Rhizobium_leguminosarum_GCF_000009265.1_ASM926v1	96.77	0.0	0.048557544396793	-	acetyl-CoA acetyltransferase
NGR_c01680	Sinorhizobium_fredii_GCF_000018545.1_ASM1854v1	92.29	0.0	0.0599789677276162	fadA	acetyl-CoA acetyltransferase
SMc02228	Sinorhizobium_meliloti_GCF_000006965.1_ASM696v1	92.79	0.0	0.0591722228679508	fadA	acetyl-CoA acetyltransferase
AZC_RS15355	Azorhizobium_caulinodans_GCF_000010525.1_ASM1052v1	36.14	8e-73
/home/htaboada/sp27/red_etli/bin/footprint_discovery_enero_2018/etli_23_Feb_2018/Rhizobiales/Rhizobium_etli_GCF_000092045.1_ASM9204v1/RHE_RS21425/RHE_RS21425_Rhizobium_etli_GCF_000092045.1_ASM9204v1_Rhizobiales_taxfreq_ortho_bbh.tab
RHE_RS21425	Rhizobium_etli_GCF_000092045.1_ASM9204v1	100.00	1e-96	0.0463905055995902	-	MULTISPECIES: type VI secretion protein
RL_RS24890	Rhizobium_leguminosarum_GCF_000009265.1_ASM926v1	46.34	2e-24
/home/htaboada/sp27/red_etli/bin/footprint_discovery_enero_2018/etli_23_Feb_2018/Rhizobiales/Rhizobium_etli_GCF_000092045.1_ASM9204v1/RHE_RS19180/RHE_RS19180_Rhizobium_etli_GCF_000092045.1_ASM9204v1_Rhizobiales_taxfreq_ortho_bbh.tab
AAV28_RS03930	Bradyrhizobium_diazoefficiens_GCF_001642675.1_ASM164267v1	35.17	1e-111	0.0381011911450725	-	MULTISPECIES: M23 family peptidase
BBTA_RS05645	Bradyrhizobium_sp._BTAi1_GCF_000015165.1_ASM1516v1	35.14	8e-112	0.0432043675687942	-	M23 family peptidase
MAFF_RS14490	Mesorhizobium_loti_GCF_000009625.1_ASM962v1	55.24	0.0	0.0387247984688499	-	M23 family peptidase
RHE_RS19180	Rhizobium_etli_GCF_000092045.1_ASM9204v1	100.00	0.0	0.0463905055995902	-	M23 family peptidase
REMIM1_RS18950	Rhizobium_etli_GCF_000442435.1_ASM44243v1	99.85	0.0	0.0415331226653256	-	M23 family peptidase
RL_RS22070	Rhizobium_leguminosarum_GCF_000009265.1_ASM926v1	95.82	0.0	0.0385495008951639	-	M23 family peptidase
NGR_c26530	Sinorhizobium_fredii_GCF_000018545.1_ASM1854v1	69.74	0.0	0.0435970470266814	-	metalloendopeptidase
SMc02432	Sinorhizobium_meliloti_GCF_000006965.1_ASM696v1	70.11	0.0	0.0409450649309481	-	hypothetical protein SMc02432
AZC_RS21545	Azorhizobium_caulinodans_GCF_000010525.1_ASM1052v1	36.11	4e-116
/home/htaboada/sp27/red_etli/bin/footprint_discovery_enero_2018/etli_23_Feb_2018/Rhizobiales/Rhizobium_etli_GCF_000092045.1_ASM9204v1/RHE_RS17045/RHE_RS17045_Rhizobium_etli_GCF_000092045.1_ASM9204v1_Rhizobiales_taxfreq_ortho_bbh.tab
AAV28_RS07395	Bradyrhizobium_diazoefficiens_GCF_001642675.1_ASM164267v1	58.11	8e-26	0.0156267558152601	-	MULTISPECIES: flagellar export protein FliJ
BBTA_RS30620	Bradyrhizobium_sp._BTAi1_GCF_000015165.1_ASM1516v1	58.11	1e-25
MAFF_RS12110	Mesorhizobium_loti_GCF_000009625.1_ASM962v1	63.48	4e-32	0.0310203883022724	-	flagellar export protein FliJ
RHE_RS17045	Rhizobium_etli_GCF_000092045.1_ASM9204v1	100.00	7e-57	0.0463905055995902	-	MULTISPECIES: hypothetical protein
REMIM1_RS16810	Rhizobium_etli_GCF_000442435.1_ASM44243v1	100.00	8e-57	0.0390311273240409	-	MULTISPECIES: hypothetical protein
RL_RS19375	Rhizobium_leguminosarum_GCF_000009265.1_ASM926v1	97.37	2e-54	0.0418855153957069	-	MULTISPECIES: hypothetical protein
NGR_c27570	Sinorhizobium_fredii_GCF_000018545.1_ASM1854v1	83.19	8e-46	0.0422759243895092	-	hypothetical protein NGR_c27570
SMc00655	Sinorhizobium_meliloti_GCF_000006965.1_ASM696v1	86.73	8e-48	0.0412092266401801	-	hypothetical protein SMc00655
AZC_RS06185	Azorhizobium_caulinodans_GCF_000010525.1_ASM1052v1	54.05	7e-22	0.0759306370385754	-	hypothetical protein
/home/htaboada/sp27/red_etli/bin/footprint_discovery_enero_2018/etli_23_Feb_2018/Rhizobiales/Rhizobium_etli_GCF_000092045.1_ASM9204v1/RHE_RS11885/RHE_RS11885_Rhizobium_etli_GCF_000092045.1_ASM9204v1_Rhizobiales_taxfreq_ortho_bbh.tab
AAV28_RS25965	Bradyrhizobium_diazoefficiens_GCF_001642675.1_ASM164267v1	48.51	0.0	0.0240546690639398	-	MULTISPECIES: signal transduction histidine kinase
BBTA_RS25640	Bradyrhizobium_sp._BTAi1_GCF_000015165.1_ASM1516v1	49.00	0.0	0.0641519397233611	-	hybrid sensor histidine kinase
MAFF_RS04210	Mesorhizobium_loti_GCF_000009625.1_ASM962v1	58.57	0.0	0.0198692683243313	-	PAS domain-containing sensor histidine kinase
RHE_RS11885	Rhizobium_etli_GCF_000092045.1_ASM9204v1	100.00	0.0	0.0463905055995902	-	PAS domain-containing sensor histidine kinase
REMIM1_RS11720	Rhizobium_etli_GCF_000442435.1_ASM44243v1	99.88	0.0	0.0427841203359679	-	PAS domain-containing sensor histidine kinase
RL_RS13630	Rhizobium_leguminosarum_GCF_000009265.1_ASM926v1	93.88	0.0	0.0418855153957069	-	PAS domain-containing sensor histidine kinase
NGR_c16500	Sinorhizobium_fredii_GCF_000018545.1_ASM1854v1	76.25	0.0	0.0576009469807063	-	two component sensor kinase
SMc00471	Sinorhizobium_meliloti_GCF_000006965.1_ASM696v1	75.55	0.0	0.041473388349412	-	sensor histidine kinase transmembrane protein
AZC_RS08645	Azorhizobium_caulinodans_GCF_000010525.1_ASM1052v1	41.99	4e-167	0.0389387882249104	-	hybrid sensor histidine kinase
/home/htaboada/sp27/red_etli/bin/footprint_discovery_enero_2018/etli_23_Feb_2018/Rhizobiales/Rhizobium_etli_GCF_000092045.1_ASM9204v1/RHE_RS20575/RHE_RS20575_Rhizobium_etli_GCF_000092045.1_ASM9204v1_Rhizobiales_taxfreq_ortho_bbh.tab
AAV28_RS45430	Bradyrhizobium_diazoefficiens_GCF_001642675.1_ASM164267v1	65.05	2e-86	0.0431930553994831	-	MULTISPECIES: transcriptional regulator
BBTA_RS35290	Bradyrhizobium_sp._BTAi1_GCF_000015165.1_ASM1516v1	68.33	5e-88
MAFF_RS16175	Mesorhizobium_loti_GCF_000009625.1_ASM962v1	88.00	2e-114	0.0362918268372991	-	MULTISPECIES: CarD family transcriptional regulator
RHE_RS20575	Rhizobium_etli_GCF_000092045.1_ASM9204v1	100.00	2e-141	0.0461059012707583	-	MULTISPECIES: CarD family transcriptional regulator
REMIM1_RS20345	Rhizobium_etli_GCF_000442435.1_ASM44243v1	100.00	3e-141	0.0382805287216555	-	MULTISPECIES: CarD family transcriptional regulator
RL_RS23770	Rhizobium_leguminosarum_GCF_000009265.1_ASM926v1	99.47	1e-140	0.0329894767275922	-	MULTISPECIES: CarD family transcriptional regulator
NGR_c32670	Sinorhizobium_fredii_GCF_000018545.1_ASM1854v1	95.26	4e-132	0.0414832508072059	-	transcriptional regulator, CarD family
SMc03874	Sinorhizobium_meliloti_GCF_000006965.1_ASM696v1	94.74	3e-131	0.0433225203140354	-	hypothetical protein SMc03874
AZC_RS20735	Azorhizobium_caulinodans_GCF_000010525.1_ASM1052v1	71.81	1e-95	0.0804734956648149	-	CarD family transcriptional regulator
/home/htaboada/sp27/red_etli/bin/footprint_discovery_enero_2018/etli_23_Feb_2018/Rhizobiales/Rhizobium_etli_GCF_000092045.1_ASM9204v1/RHE_RS17065/RHE_RS17065_Rhizobium_etli_GCF_000092045.1_ASM9204v1_Rhizobiales_taxfreq_ortho_bbh.tab
AAV28_RS07320	Bradyrhizobium_diazoefficiens_GCF_001642675.1_ASM164267v1	60.76	4e-69	0.0230011799078548	-	DUF1134 domain-containing protein
BBTA_RS30775	Bradyrhizobium_sp._BTAi1_GCF_000015165.1_ASM1516v1	59.75	2e-69
MAFF_RS12090	Mesorhizobium_loti_GCF_000009625.1_ASM962v1	62.43	2e-84	0.0425770035521386	-	DUF1134 domain-containing protein
RHE_RS17065	Rhizobium_etli_GCF_000092045.1_ASM9204v1	100.00	3e-143	0.0461059012707583	-	DUF1134 domain-containing protein
REMIM1_RS16830	Rhizobium_etli_GCF_000442435.1_ASM44243v1	100.00	3e-143	0.0435347189383533	-	DUF1134 domain-containing protein
RL_RS19395	Rhizobium_leguminosarum_GCF_000009265.1_ASM926v1	93.85	7e-137	0.0318774718940778	-	DUF1134 domain-containing protein
NGR_c27610	Sinorhizobium_fredii_GCF_000018545.1_ASM1854v1	67.01	4e-95	0.0396336791151649	-	hypothetical protein NGR_c27610
SMc00651	Sinorhizobium_meliloti_GCF_000006965.1_ASM696v1	65.50	1e-95	0.0433225203140354	-	hypothetical protein SMc00651
/home/htaboada/sp27/red_etli/bin/footprint_discovery_enero_2018/etli_23_Feb_2018/Rhizobiales/Rhizobium_etli_GCF_000092045.1_ASM9204v1/RHE_RS19935/RHE_RS19935_Rhizobium_etli_GCF_000092045.1_ASM9204v1_Rhizobiales_taxfreq_ortho_bbh.tab
AAV28_RS41065	Bradyrhizobium_diazoefficiens_GCF_001642675.1_ASM164267v1	56.91	3e-40	0.0193139678615575	-	MULTISPECIES: succinate dehydrogenase, cytochrome b556 subunit
BBTA_RS01100	Bradyrhizobium_sp._BTAi1_GCF_000015165.1_ASM1516v1	56.91	2e-40	0.0519325226331971	sdhC	succinate dehydrogenase, cytochrome b556 subunit
MAFF_RS17680	Mesorhizobium_loti_GCF_000009625.1_ASM962v1	61.60	3e-48	0.0340616028417109	-	succinate dehydrogenase, cytochrome b556 subunit
RHE_RS19935	Rhizobium_etli_GCF_000092045.1_ASM9204v1	100.00	2e-82	0.0458212969419265	sdhC	MULTISPECIES: succinate dehydrogenase, cytochrome b556 subunit
REMIM1_RS19705	Rhizobium_etli_GCF_000442435.1_ASM44243v1	100.00	2e-82	0.0397817259264263	-	MULTISPECIES: succinate dehydrogenase, cytochrome b556 subunit
RL_RS22925	Rhizobium_leguminosarum_GCF_000009265.1_ASM926v1	93.89	2e-77	0.0322481401719159	-	succinate dehydrogenase, cytochrome b556 subunit
NGR_c31370	Sinorhizobium_fredii_GCF_000018545.1_ASM1854v1	71.54	3e-60	0.0422759243895092	-	succinate dehydrogenase membrane anchor subunit
SMc02463	Sinorhizobium_meliloti_GCF_000006965.1_ASM696v1	68.46	5e-59	0.0361901541647735	sdhC	succinate dehydrogenase cytochrome B-556 subunit transmembrane protein
AZC_RS19285	Azorhizobium_caulinodans_GCF_000010525.1_ASM1052v1	56.91	3e-38	0.0941020715435336	-	succinate dehydrogenase, cytochrome b556 subunit
/home/htaboada/sp27/red_etli/bin/footprint_discovery_enero_2018/etli_23_Feb_2018/Rhizobiales/Rhizobium_etli_GCF_000092045.1_ASM9204v1/RHE_RS17710/RHE_RS17710_Rhizobium_etli_GCF_000092045.1_ASM9204v1_Rhizobiales_taxfreq_ortho_bbh.tab
AAV28_RS32790	Bradyrhizobium_diazoefficiens_GCF_001642675.1_ASM164267v1	66.52	6e-107	0.0316046746825486	-	MULTISPECIES: protein TolQ
BBTA_RS32225	Bradyrhizobium_sp._BTAi1_GCF_000015165.1_ASM1516v1	66.37	3e-104
MAFF_RS16325	Mesorhizobium_loti_GCF_000009625.1_ASM962v1	73.31	5e-128	0.0379138079249996	-	protein TolQ
RHE_RS17710	Rhizobium_etli_GCF_000092045.1_ASM9204v1	100.00	8e-174	0.0458212969419265	tolQ	MULTISPECIES: protein TolQ
REMIM1_RS17475	Rhizobium_etli_GCF_000442435.1_ASM44243v1	100.00	8e-174	0.0392813268581694	-	MULTISPECIES: protein TolQ
RL_RS20495	Rhizobium_leguminosarum_GCF_000009265.1_ASM926v1	98.74	1e-171	0.0496695492303073	-	MULTISPECIES: protein TolQ
NGR_c27830	Sinorhizobium_fredii_GCF_000018545.1_ASM1854v1	88.33	6e-152	0.043332822499247	tolQ	TolQ protein uptake system component
SMc03958	Sinorhizobium_meliloti_GCF_000006965.1_ASM696v1	87.50	7e-151	0.0324918902355266	tolQ	transport transmembrane protein
AZC_RS02645	Azorhizobium_caulinodans_GCF_000010525.1_ASM1052v1	69.47	9e-112	0.0337469497949224	-	protein TolQ
/home/htaboada/sp27/red_etli/bin/footprint_discovery_enero_2018/etli_23_Feb_2018/Rhizobiales/Rhizobium_etli_GCF_000092045.1_ASM9204v1/RHE_RS07555/RHE_RS07555_Rhizobium_etli_GCF_000092045.1_ASM9204v1_Rhizobiales_taxfreq_ortho_bbh.tab
AAV28_RS34400	Bradyrhizobium_diazoefficiens_GCF_001642675.1_ASM164267v1	37.13	1e-22	0.0417884031913698	-	MULTISPECIES: porin family protein
BBTA_RS08030	Bradyrhizobium_sp._BTAi1_GCF_000015165.1_ASM1516v1	36.53	3e-21	0.042549755938964	-	porin family protein
MAFF_RS32150	Mesorhizobium_loti_GCF_000009625.1_ASM962v1	41.62	4e-26	0.0275736784909088	-	porin family protein
RHE_RS07555	Rhizobium_etli_GCF_000092045.1_ASM9204v1	100.00	3e-116	0.0458212969419265	-	MULTISPECIES: porin family protein
REMIM1_RS07730	Rhizobium_etli_GCF_000442435.1_ASM44243v1	100.00	3e-116	0.042283721267711	-	MULTISPECIES: porin family protein
RL_RS08235	Rhizobium_leguminosarum_GCF_000009265.1_ASM926v1	96.68	3e-112	0.058194919620584	-	porin family protein
NGR_c09220	Sinorhizobium_fredii_GCF_000018545.1_ASM1854v1	51.35	4e-50	0.0576009469807063	-	outer membrane protein
SMc00604	Sinorhizobium_meliloti_GCF_000006965.1_ASM696v1	51.63	1e-42	0.0369826392924693	ropB1	outer membrane protein
AZC_RS19205	Azorhizobium_caulinodans_GCF_000010525.1_ASM1052v1	34.98	3e-20	0.119412283889725	-	porin family protein
/home/htaboada/sp27/red_etli/bin/footprint_discovery_enero_2018/etli_23_Feb_2018/Rhizobiales/Rhizobium_etli_GCF_000092045.1_ASM9204v1/RHE_RS21445/RHE_RS21445_Rhizobium_etli_GCF_000092045.1_ASM9204v1_Rhizobiales_taxfreq_ortho_bbh.tab
RHE_RS21445	Rhizobium_etli_GCF_000092045.1_ASM9204v1	100.00	0.0	0.0455366926130946	-	IS4-like element ISRel1 family transposase
NGR_b15530	Sinorhizobium_fredii_GCF_000018545.1_ASM1854v1	37.47	1e-78	0.0206095131398858	-	transposase Y4zB-like protein (plasmid)
SM_b20766	Sinorhizobium_meliloti_GCF_000006965.1_ASM696v1	38.36	3e-79
/home/htaboada/sp27/red_etli/bin/footprint_discovery_enero_2018/etli_23_Feb_2018/Rhizobiales/Rhizobium_etli_GCF_000092045.1_ASM9204v1/RHE_RS17915/RHE_RS17915_Rhizobium_etli_GCF_000092045.1_ASM9204v1_Rhizobiales_taxfreq_ortho_bbh.tab
AAV28_RS04455	Bradyrhizobium_diazoefficiens_GCF_001642675.1_ASM164267v1	47.88	5e-41	0.0363453758849309	-	MULTISPECIES: DUF1465 domain-containing protein
BBTA_RS32525	Bradyrhizobium_sp._BTAi1_GCF_000015165.1_ASM1516v1	52.86	2e-40
MAFF_RS16370	Mesorhizobium_loti_GCF_000009625.1_ASM962v1	57.14	7e-59	0.0273709308549462	-	DUF1465 domain-containing protein
RHE_RS17915	Rhizobium_etli_GCF_000092045.1_ASM9204v1	100.00	8e-125	0.0455366926130946	-	MULTISPECIES: DUF1465 domain-containing protein
REMIM1_RS17680	Rhizobium_etli_GCF_000442435.1_ASM44243v1	100.00	9e-125	0.0407825240629402	-	MULTISPECIES: DUF1465 domain-containing protein
RL_RS20725	Rhizobium_leguminosarum_GCF_000009265.1_ASM926v1	99.42	2e-124	0.051893558897336	-	MULTISPECIES: DUF1465 domain-containing protein
NGR_c28160	Sinorhizobium_fredii_GCF_000018545.1_ASM1854v1	81.98	3e-103	0.0319711678195664	-	hypothetical protein NGR_c28160
SMc03989	Sinorhizobium_meliloti_GCF_000006965.1_ASM696v1	83.53	3e-102	0.0406809032217162	-	hypothetical protein SMc03989
AZC_RS02500	Azorhizobium_caulinodans_GCF_000010525.1_ASM1052v1	40.57	2e-08
/home/htaboada/sp27/red_etli/bin/footprint_discovery_enero_2018/etli_23_Feb_2018/Rhizobiales/Rhizobium_etli_GCF_000092045.1_ASM9204v1/RHE_RS15360/RHE_RS15360_Rhizobium_etli_GCF_000092045.1_ASM9204v1_Rhizobiales_taxfreq_ortho_bbh.tab
RHE_RS15360	Rhizobium_etli_GCF_000092045.1_ASM9204v1	100.00	0.0	0.0455366926130946	-	PQQ-dependent sugar dehydrogenase
REMIM1_RS15130	Rhizobium_etli_GCF_000442435.1_ASM44243v1	100.00	0.0	0.0397817259264263	-	PQQ-dependent sugar dehydrogenase
RL_RS17750	Rhizobium_leguminosarum_GCF_000009265.1_ASM926v1	87.11	0.0	0.0214987601146106	-	PQQ-dependent sugar dehydrogenase
NGR_c22790	Sinorhizobium_fredii_GCF_000018545.1_ASM1854v1	66.09	4e-172	0.0232517584142301	-	glucose dehydrogenase
SMc01583	Sinorhizobium_meliloti_GCF_000006965.1_ASM696v1	63.59	5e-169	0.0187554813554666	-	hypothetical protein SMc01583
/home/htaboada/sp27/red_etli/bin/footprint_discovery_enero_2018/etli_23_Feb_2018/Rhizobiales/Rhizobium_etli_GCF_000092045.1_ASM9204v1/RHE_RS06075/RHE_RS06075_Rhizobium_etli_GCF_000092045.1_ASM9204v1_Rhizobiales_taxfreq_ortho_bbh.tab
BBTA_RS37250	Bradyrhizobium_sp._BTAi1_GCF_000015165.1_ASM1516v1	49.41	2e-162
RHE_RS06075	Rhizobium_etli_GCF_000092045.1_ASM9204v1	100.00	0.0	0.0455366926130946	-	glucose-6-phosphate dehydrogenase
REMIM1_RS06315	Rhizobium_etli_GCF_000442435.1_ASM44243v1	99.41	0.0	0.0405323245288117	-	glucose-6-phosphate dehydrogenase
RL_RS06860	Rhizobium_leguminosarum_GCF_000009265.1_ASM926v1	91.04	0.0	0.0370668277838114	-	glucose-6-phosphate dehydrogenase
/home/htaboada/sp27/red_etli/bin/footprint_discovery_enero_2018/etli_23_Feb_2018/Rhizobiales/Rhizobium_etli_GCF_000092045.1_ASM9204v1/RHE_RS00420/RHE_RS00420_Rhizobium_etli_GCF_000092045.1_ASM9204v1_Rhizobiales_taxfreq_ortho_bbh.tab
RHE_RS00420	Rhizobium_etli_GCF_000092045.1_ASM9204v1	100.00	0.0	0.0455366926130946	-	carbohydrate ABC transporter substrate-binding protein
REMIM1_RS00860	Rhizobium_etli_GCF_000442435.1_ASM44243v1	100.00	0.0	0.0367793315168847	-	carbohydrate ABC transporter substrate-binding protein
RL_RS00490	Rhizobium_leguminosarum_GCF_000009265.1_ASM926v1	95.09	0.0	0.0352134863946209	-	carbohydrate ABC transporter substrate-binding protein
NGR_b17990	Sinorhizobium_fredii_GCF_000018545.1_ASM1854v1	68.93	0.0	0.0303858206549598	-	oligogalacturonate binding protein (plasmid)
SMc04135	Sinorhizobium_meliloti_GCF_000006965.1_ASM696v1	67.52	0.0	0.0462282991155866	-	periplasmic binding ABC transporter protein
/home/htaboada/sp27/red_etli/bin/footprint_discovery_enero_2018/etli_23_Feb_2018/Rhizobiales/Rhizobium_etli_GCF_000092045.1_ASM9204v1/RHE_RS29390/RHE_RS29390_Rhizobium_etli_GCF_000092045.1_ASM9204v1_Rhizobiales_taxfreq_ortho_bbh.tab
RHE_RS29390	Rhizobium_etli_GCF_000092045.1_ASM9204v1	100.00	0.0	0.0452520882842628	-	sugar ABC transporter permease
REMIM1_RS34425	Rhizobium_etli_GCF_000442435.1_ASM44243v1	100.00	0.0	0.0407825240629402	-	sugar ABC transporter permease
RL_RS34690	Rhizobium_leguminosarum_GCF_000009265.1_ASM926v1	97.73	0.0	0.0303947987827254	-	MULTISPECIES: sugar ABC transporter permease
/home/htaboada/sp27/red_etli/bin/footprint_discovery_enero_2018/etli_23_Feb_2018/Rhizobiales/Rhizobium_etli_GCF_000092045.1_ASM9204v1/RHE_RS11590/RHE_RS11590_Rhizobium_etli_GCF_000092045.1_ASM9204v1_Rhizobiales_taxfreq_ortho_bbh.tab
AAV28_RS13140	Bradyrhizobium_diazoefficiens_GCF_001642675.1_ASM164267v1	40.49	2e-37
BBTA_RS08715	Bradyrhizobium_sp._BTAi1_GCF_000015165.1_ASM1516v1	35.33	4e-19
MAFF_RS01410	Mesorhizobium_loti_GCF_000009625.1_ASM962v1	48.17	9e-55	0.0314258835741975	-	4-hydroxyphenylacetate 3-monooxygenase
RHE_RS11590	Rhizobium_etli_GCF_000092045.1_ASM9204v1	100.00	3e-122	0.0452520882842628	-	4-hydroxyphenylacetate 3-monooxygenase
REMIM1_RS11425	Rhizobium_etli_GCF_000442435.1_ASM44243v1	100.00	3e-122	0.0430343198700964	-	4-hydroxyphenylacetate 3-monooxygenase
RL_RS13385	Rhizobium_leguminosarum_GCF_000009265.1_ASM926v1	91.46	4e-112	0.0252054428929918	-	4-hydroxyphenylacetate 3-monooxygenase
NGR_c15230	Sinorhizobium_fredii_GCF_000018545.1_ASM1854v1	54.27	1e-62	0.0272151263257466	-	flavoprotein oxidoreductase
SMc00514	Sinorhizobium_meliloti_GCF_000006965.1_ASM696v1	54.88	2e-63	0.0464924608248185	-	monooxygenase
/home/htaboada/sp27/red_etli/bin/footprint_discovery_enero_2018/etli_23_Feb_2018/Rhizobiales/Rhizobium_etli_GCF_000092045.1_ASM9204v1/RHE_RS01585/RHE_RS01585_Rhizobium_etli_GCF_000092045.1_ASM9204v1_Rhizobiales_taxfreq_ortho_bbh.tab
AAV28_RS00255	Bradyrhizobium_diazoefficiens_GCF_001642675.1_ASM164267v1	53.19	8e-34	0.0303756040004495	-	MULTISPECIES: DUF1330 domain-containing protein
BBTA_RS00940	Bradyrhizobium_sp._BTAi1_GCF_000015165.1_ASM1516v1	52.13	3e-32	0.0338216008745611	-	DUF1330 domain-containing protein
MAFF_RS19550	Mesorhizobium_loti_GCF_000009625.1_ASM962v1	67.02	4e-41	0.0379138079249996	-	DUF1330 domain-containing protein
RHE_RS01585	Rhizobium_etli_GCF_000092045.1_ASM9204v1	100.00	4e-67	0.0452520882842628	-	MULTISPECIES: DUF1330 domain-containing protein
REMIM1_RS02005	Rhizobium_etli_GCF_000442435.1_ASM44243v1	100.00	4e-67	0.0415331226653256	-	MULTISPECIES: DUF1330 domain-containing protein
RL_RS01725	Rhizobium_leguminosarum_GCF_000009265.1_ASM926v1	96.84	7e-65	0.0674616265665368	-	MULTISPECIES: DUF1330 domain-containing protein
NGR_c36690	Sinorhizobium_fredii_GCF_000018545.1_ASM1854v1	85.26	4e-56	0.0229875338867956	-	hypothetical protein NGR_c36690
SMc00411	Sinorhizobium_meliloti_GCF_000006965.1_ASM696v1	85.26	2e-56	0.0272086560508881	-	hypothetical protein SMc00411
AZC_RS24625	Azorhizobium_caulinodans_GCF_000010525.1_ASM1052v1	45.16	1e-24
/home/htaboada/sp27/red_etli/bin/footprint_discovery_enero_2018/etli_23_Feb_2018/Rhizobiales/Rhizobium_etli_GCF_000092045.1_ASM9204v1/RHE_RS22815/RHE_RS22815_Rhizobium_etli_GCF_000092045.1_ASM9204v1_Rhizobiales_taxfreq_ortho_bbh.tab
AAV28_RS31485	Bradyrhizobium_diazoefficiens_GCF_001642675.1_ASM164267v1	46.64	8e-73	0.0370477019889875	-	MetQ
BBTA_RS22765	Bradyrhizobium_sp._BTAi1_GCF_000015165.1_ASM1516v1	57.78	1e-84	0.0353490280108316	-	MetQ
MAFF_RS19725	Mesorhizobium_loti_GCF_000009625.1_ASM962v1	85.29	1e-153	0.0358863315653739	-	MetQ
RHE_RS22815	Rhizobium_etli_GCF_000092045.1_ASM9204v1	100.00	0.0	0.044967483955431	-	MetQ/NlpA family lipoprotein
REMIM1_RS21790	Rhizobium_etli_GCF_000442435.1_ASM44243v1	98.92	0.0	0.0407825240629402	-	MetQ/NlpA family lipoprotein
RL_RS27350	Rhizobium_leguminosarum_GCF_000009265.1_ASM926v1	92.83	6e-176	0.0470748712854405	-	MetQ
NGR_c29410	Sinorhizobium_fredii_GCF_000018545.1_ASM1854v1	48.76	7e-78	0.0277435753806154	-	lipoprotein
SMc03157	Sinorhizobium_meliloti_GCF_000006965.1_ASM696v1	48.32	3e-74	0.0232462304124093	-	outer membrane lipoprotein transmembrane
AZC_RS04820	Azorhizobium_caulinodans_GCF_000010525.1_ASM1052v1	45.80	1e-77	0.17846944603084	-	MetQ
/home/htaboada/sp27/red_etli/bin/footprint_discovery_enero_2018/etli_23_Feb_2018/Rhizobiales/Rhizobium_etli_GCF_000092045.1_ASM9204v1/RHE_RS14620/RHE_RS14620_Rhizobium_etli_GCF_000092045.1_ASM9204v1_Rhizobiales_taxfreq_ortho_bbh.tab
MAFF_RS07385	Mesorhizobium_loti_GCF_000009625.1_ASM962v1	75.44	8e-62	0.0296011548505344	-	lytic transglycosylase
RHE_RS14620	Rhizobium_etli_GCF_000092045.1_ASM9204v1	100.00	2e-155	0.044967483955431	-	lytic transglycosylase domain-containing protein
REMIM1_RS14460	Rhizobium_etli_GCF_000442435.1_ASM44243v1	100.00	3e-155	0.0490391086891796	-	lytic transglycosylase domain-containing protein
RL_RS17090	Rhizobium_leguminosarum_GCF_000009265.1_ASM926v1	95.15	9e-147	0.0426268519513831	-	lytic transglycosylase domain-containing protein
NGR_c21190	Sinorhizobium_fredii_GCF_000018545.1_ASM1854v1	51.69	2e-65	0.0539018035966243	-	transglycosylase protein
SMc01855	Sinorhizobium_meliloti_GCF_000006965.1_ASM696v1	61.59	6e-63	0.0546814738110082	-	hypothetical protein SMc01855
AZC_RS19685	Azorhizobium_caulinodans_GCF_000010525.1_ASM1052v1	32.14	8e-15
/home/htaboada/sp27/red_etli/bin/footprint_discovery_enero_2018/etli_23_Feb_2018/Rhizobiales/Rhizobium_etli_GCF_000092045.1_ASM9204v1/RHE_RS07420/RHE_RS07420_Rhizobium_etli_GCF_000092045.1_ASM9204v1_Rhizobiales_taxfreq_ortho_bbh.tab
AAV28_RS17045	Bradyrhizobium_diazoefficiens_GCF_001642675.1_ASM164267v1	32.03	1e-52	0.0359942128329026	-	MULTISPECIES: LPS export ABC transporter permease LptF
BBTA_RS17955	Bradyrhizobium_sp._BTAi1_GCF_000015165.1_ASM1516v1	31.76	1e-47	0.0687342211321726	lptF	LPS export ABC transporter permease LptF
MAFF_RS32010	Mesorhizobium_loti_GCF_000009625.1_ASM962v1	50.27	2e-123	0.048456684995053	-	LPS export ABC transporter permease LptF
RHE_RS07420	Rhizobium_etli_GCF_000092045.1_ASM9204v1	100.00	0.0	0.044967483955431	-	MULTISPECIES: LptF/LptG family permease
REMIM1_RS07595	Rhizobium_etli_GCF_000442435.1_ASM44243v1	99.75	0.0	0.0442853175407387	-	LptF/LptG family permease
RL_RS08135	Rhizobium_leguminosarum_GCF_000009265.1_ASM926v1	94.66	0.0	0.0337308132832684	-	LPS export ABC transporter permease LptF
NGR_c09030	Sinorhizobium_fredii_GCF_000018545.1_ASM1854v1	54.42	3e-146	0.0369914338408206	-	permease
SMc00584	Sinorhizobium_meliloti_GCF_000006965.1_ASM696v1	55.25	1e-147	0.0401525798032524	-	hypothetical protein SMc00584
AZC_RS22180	Azorhizobium_caulinodans_GCF_000010525.1_ASM1052v1	30.92	5e-48	0.0979959503660246	-	LPS export ABC transporter permease LptF
/home/htaboada/sp27/red_etli/bin/footprint_discovery_enero_2018/etli_23_Feb_2018/Rhizobiales/Rhizobium_etli_GCF_000092045.1_ASM9204v1/RHE_RS04135/RHE_RS04135_Rhizobium_etli_GCF_000092045.1_ASM9204v1_Rhizobiales_taxfreq_ortho_bbh.tab
AAV28_RS34340	Bradyrhizobium_diazoefficiens_GCF_001642675.1_ASM164267v1	66.00	0.0	0.0159779188672885	-	histidine--tRNA ligase
BBTA_RS08085	Bradyrhizobium_sp._BTAi1_GCF_000015165.1_ASM1516v1	61.18	0.0	0.0530235420162475	-	histidine--tRNA ligase
MAFF_RS28265	Mesorhizobium_loti_GCF_000009625.1_ASM962v1	69.70	0.0	0.0233159781356949	-	histidine--tRNA ligase
RHE_RS04135	Rhizobium_etli_GCF_000092045.1_ASM9204v1	100.00	0.0	0.044967483955431	-	histidine--tRNA ligase
REMIM1_RS04555	Rhizobium_etli_GCF_000442435.1_ASM44243v1	99.01	0.0	0.0407825240629402	-	histidine--tRNA ligase
RL_RS04590	Rhizobium_leguminosarum_GCF_000009265.1_ASM926v1	95.63	0.0	0.0211280918367725	-	histidine--tRNA ligase
NGR_c04010	Sinorhizobium_fredii_GCF_000018545.1_ASM1854v1	86.31	0.0	0.0240444319965334	hisS	histidyl-tRNA synthetase
SMc00919	Sinorhizobium_meliloti_GCF_000006965.1_ASM696v1	84.72	0.0	0.0245670389585689	hisS	histidyl-tRNA synthetase
AZC_RS21735	Azorhizobium_caulinodans_GCF_000010525.1_ASM1052v1	63.93	0.0
/home/htaboada/sp27/red_etli/bin/footprint_discovery_enero_2018/etli_23_Feb_2018/Rhizobiales/Rhizobium_etli_GCF_000092045.1_ASM9204v1/RHE_RS29385/RHE_RS29385_Rhizobium_etli_GCF_000092045.1_ASM9204v1_Rhizobiales_taxfreq_ortho_bbh.tab
RHE_RS29385	Rhizobium_etli_GCF_000092045.1_ASM9204v1	100.00	0.0	0.0446828796265991	-	ABC transporter substrate-binding protein
REMIM1_RS34420	Rhizobium_etli_GCF_000442435.1_ASM44243v1	99.54	0.0	0.0425339208018395	-	sugar ABC transporter substrate-binding protein
RL_RS34685	Rhizobium_leguminosarum_GCF_000009265.1_ASM926v1	94.44	0.0	0.0322481401719159	-	MULTISPECIES: ABC transporter substrate-binding protein
/home/htaboada/sp27/red_etli/bin/footprint_discovery_enero_2018/etli_23_Feb_2018/Rhizobiales/Rhizobium_etli_GCF_000092045.1_ASM9204v1/RHE_RS18505/RHE_RS18505_Rhizobium_etli_GCF_000092045.1_ASM9204v1_Rhizobiales_taxfreq_ortho_bbh.tab
AAV28_RS15175	Bradyrhizobium_diazoefficiens_GCF_001642675.1_ASM164267v1	63.20	3e-160	0.0194895493875716	-	MULTISPECIES: ABC transporter substrate-binding protein
BBTA_RS16195	Bradyrhizobium_sp._BTAi1_GCF_000015165.1_ASM1516v1	63.50	1e-160	0.0248752419335482	-	ABC transporter substrate-binding protein
MAFF_RS21165	Mesorhizobium_loti_GCF_000009625.1_ASM962v1	63.96	4e-164	0.0247352115874329	-	ABC transporter substrate-binding protein
RHE_RS18505	Rhizobium_etli_GCF_000092045.1_ASM9204v1	100.00	0.0	0.0446828796265991	-	ABC transporter substrate-binding protein
REMIM1_RS18275	Rhizobium_etli_GCF_000442435.1_ASM44243v1	100.00	0.0	0.0397817259264263	-	ABC transporter substrate-binding protein
RL_RS21360	Rhizobium_leguminosarum_GCF_000009265.1_ASM926v1	97.01	0.0	0.0303947987827254	-	ABC transporter substrate-binding protein
NGR_c17750	Sinorhizobium_fredii_GCF_000018545.1_ASM1854v1	65.49	1e-165	0.0235159829416645	dctP	TRAP dicarboxylate transporter subunit DctP
SMc04251	Sinorhizobium_meliloti_GCF_000006965.1_ASM696v1	65.49	2e-162	0.0401525798032524	-	mannitol-binding periplasmic signal peptide protein
AZC_RS17305	Azorhizobium_caulinodans_GCF_000010525.1_ASM1052v1	62.31	2e-145	0.0629510409636052	-	ABC transporter substrate-binding protein
/home/htaboada/sp27/red_etli/bin/footprint_discovery_enero_2018/etli_23_Feb_2018/Rhizobiales/Rhizobium_etli_GCF_000092045.1_ASM9204v1/RHE_RS14245/RHE_RS14245_Rhizobium_etli_GCF_000092045.1_ASM9204v1_Rhizobiales_taxfreq_ortho_bbh.tab
MAFF_RS01225	Mesorhizobium_loti_GCF_000009625.1_ASM962v1	42.50	5e-14
RHE_RS14245	Rhizobium_etli_GCF_000092045.1_ASM9204v1	100.00	0.0	0.0446828796265991	-	oxidoreductase
RL_RS16690	Rhizobium_leguminosarum_GCF_000009265.1_ASM926v1	87.03	0.0	0.0337308132832684	-	oxidoreductase
/home/htaboada/sp27/red_etli/bin/footprint_discovery_enero_2018/etli_23_Feb_2018/Rhizobiales/Rhizobium_etli_GCF_000092045.1_ASM9204v1/RHE_RS12140/RHE_RS12140_Rhizobium_etli_GCF_000092045.1_ASM9204v1_Rhizobiales_taxfreq_ortho_bbh.tab
AAV28_RS15245	Bradyrhizobium_diazoefficiens_GCF_001642675.1_ASM164267v1	52.97	8e-157	0.0207186200696708	-	MULTISPECIES: glutathione-disulfide reductase
BBTA_RS16290	Bradyrhizobium_sp._BTAi1_GCF_000015165.1_ASM1516v1	53.63	5e-156	0.0388402900365928	gor	glutathione-disulfide reductase
MAFF_RS03185	Mesorhizobium_loti_GCF_000009625.1_ASM962v1	69.70	0.0	0.0340616028417109	-	glutathione-disulfide reductase
RHE_RS12140	Rhizobium_etli_GCF_000092045.1_ASM9204v1	100.00	0.0	0.0446828796265991	gor	glutathione-disulfide reductase
REMIM1_RS11975	Rhizobium_etli_GCF_000442435.1_ASM44243v1	100.00	0.0	0.0420335217335825	-	glutathione-disulfide reductase
RL_RS13915	Rhizobium_leguminosarum_GCF_000009265.1_ASM926v1	94.58	0.0	0.0318774718940778	-	glutathione-disulfide reductase
NGR_c17000	Sinorhizobium_fredii_GCF_000018545.1_ASM1854v1	76.41	0.0	0.0491457621028045	-	glutathione reductase
SMc00154	Sinorhizobium_meliloti_GCF_000006965.1_ASM696v1	76.41	0.0	0.0422658734771077	gor	glutathione reductase
AZC_RS12080	Azorhizobium_caulinodans_GCF_000010525.1_ASM1052v1	54.10	7e-156	0.0700898188048388	-	glutathione-disulfide reductase
/home/htaboada/sp27/red_etli/bin/footprint_discovery_enero_2018/etli_23_Feb_2018/Rhizobiales/Rhizobium_etli_GCF_000092045.1_ASM9204v1/RHE_RS05865/RHE_RS05865_Rhizobium_etli_GCF_000092045.1_ASM9204v1_Rhizobiales_taxfreq_ortho_bbh.tab
AAV28_RS08950	Bradyrhizobium_diazoefficiens_GCF_001642675.1_ASM164267v1	58.21	8e-91	0.0396814248791999	-	MULTISPECIES: glutathione S-transferase family protein
BBTA_RS10845	Bradyrhizobium_sp._BTAi1_GCF_000015165.1_ASM1516v1	60.40	5e-91	0.048659464484046	-	glutathione S-transferase
RHE_RS05865	Rhizobium_etli_GCF_000092045.1_ASM9204v1	100.00	3e-156	0.0443982752977673	-	glutathione S-transferase family protein
REMIM1_RS06105	Rhizobium_etli_GCF_000442435.1_ASM44243v1	99.51	1e-155	0.0485387096209227	-	glutathione S-transferase family protein
RL_RS06695	Rhizobium_leguminosarum_GCF_000009265.1_ASM926v1	85.92	4e-134	0.0537469002865266	-	glutathione S-transferase family protein
NGR_c07090	Sinorhizobium_fredii_GCF_000018545.1_ASM1854v1	64.88	8e-99	0.0610358658373539	-	glutathione S-transferase
SMc00036	Sinorhizobium_meliloti_GCF_000006965.1_ASM696v1	68.32	4e-93	0.0372468010017012	gst1	glutathione S-transferase
AZC_RS17630	Azorhizobium_caulinodans_GCF_000010525.1_ASM1052v1	32.51	4e-23	0.0746326774310783	-	glutathione S-transferase family protein
/home/htaboada/sp27/red_etli/bin/footprint_discovery_enero_2018/etli_23_Feb_2018/Rhizobiales/Rhizobium_etli_GCF_000092045.1_ASM9204v1/RHE_RS23995/RHE_RS23995_Rhizobium_etli_GCF_000092045.1_ASM9204v1_Rhizobiales_taxfreq_ortho_bbh.tab
RHE_RS23995	Rhizobium_etli_GCF_000092045.1_ASM9204v1	100.00	0.0	0.0441136709689354	-	ABC transporter substrate-binding protein
REMIM1_RS22955	Rhizobium_etli_GCF_000442435.1_ASM44243v1	99.15	0.0	0.0390311273240409	-	ABC transporter substrate-binding protein
RL_RS29730	Rhizobium_leguminosarum_GCF_000009265.1_ASM926v1	95.48	0.0	0.035584154672459	-	ABC transporter substrate-binding protein
/home/htaboada/sp27/red_etli/bin/footprint_discovery_enero_2018/etli_23_Feb_2018/Rhizobiales/Rhizobium_etli_GCF_000092045.1_ASM9204v1/RHE_RS18485/RHE_RS18485_Rhizobium_etli_GCF_000092045.1_ASM9204v1_Rhizobiales_taxfreq_ortho_bbh.tab
AAV28_RS32765	Bradyrhizobium_diazoefficiens_GCF_001642675.1_ASM164267v1	39.44	4e-44	0.0270395550061805	-	MULTISPECIES: hypothetical protein
BBTA_RS32200	Bradyrhizobium_sp._BTAi1_GCF_000015165.1_ASM1516v1	40.09	3e-46
MAFF_RS21215	Mesorhizobium_loti_GCF_000009625.1_ASM962v1	38.96	4e-48	0.0364945744732616	-	hypothetical protein
RHE_RS18485	Rhizobium_etli_GCF_000092045.1_ASM9204v1	100.00	0.0	0.0441136709689354	-	hypothetical protein
REMIM1_RS18255	Rhizobium_etli_GCF_000442435.1_ASM44243v1	99.60	0.0	0.0405323245288117	-	hypothetical protein
RL_RS21340	Rhizobium_leguminosarum_GCF_000009265.1_ASM926v1	89.60	7e-170	0.0578242513427458	-	MULTISPECIES: hypothetical protein
NGR_c29140	Sinorhizobium_fredii_GCF_000018545.1_ASM1854v1	49.79	6e-73	0.0462392923010257	-	hypothetical protein NGR_c29140
/home/htaboada/sp27/red_etli/bin/footprint_discovery_enero_2018/etli_23_Feb_2018/Rhizobiales/Rhizobium_etli_GCF_000092045.1_ASM9204v1/RHE_RS14315/RHE_RS14315_Rhizobium_etli_GCF_000092045.1_ASM9204v1_Rhizobiales_taxfreq_ortho_bbh.tab
AAV28_RS29505	Bradyrhizobium_diazoefficiens_GCF_001642675.1_ASM164267v1	76.14	4e-146	0.0228255983818407	-	MULTISPECIES: thymidylate synthase
BBTA_RS28535	Bradyrhizobium_sp._BTAi1_GCF_000015165.1_ASM1516v1	71.59	9e-139
MAFF_RS07010	Mesorhizobium_loti_GCF_000009625.1_ASM962v1	78.03	1e-146	0.0133813439735293	-	thymidylate synthase
RHE_RS14315	Rhizobium_etli_GCF_000092045.1_ASM9204v1	100.00	0.0	0.0441136709689354	-	thymidylate synthase
REMIM1_RS14160	Rhizobium_etli_GCF_000442435.1_ASM44243v1	100.00	0.0	0.038530728255784	-	thymidylate synthase
RL_RS16780	Rhizobium_leguminosarum_GCF_000009265.1_ASM926v1	95.45	0.0	0.0252054428929918	-	thymidylate synthase
NGR_c20540	Sinorhizobium_fredii_GCF_000018545.1_ASM1854v1	45.97	9e-80	0.0163819207009348	thyA	thymidylate synthase
SMc01444	Sinorhizobium_meliloti_GCF_000006965.1_ASM696v1	83.71	1e-161	0.0316994051078308	thyA	thymidylate synthase
/home/htaboada/sp27/red_etli/bin/footprint_discovery_enero_2018/etli_23_Feb_2018/Rhizobiales/Rhizobium_etli_GCF_000092045.1_ASM9204v1/RHE_RS13980/RHE_RS13980_Rhizobium_etli_GCF_000092045.1_ASM9204v1_Rhizobiales_taxfreq_ortho_bbh.tab
AAV28_RS34350	Bradyrhizobium_diazoefficiens_GCF_001642675.1_ASM164267v1	60.17	2e-159	0.0377500280930442	-	MULTISPECIES: branched-chain amino acid aminotransferase
BBTA_RS08080	Bradyrhizobium_sp._BTAi1_GCF_000015165.1_ASM1516v1	60.77	5e-151	0.0338216008745611	-	branched-chain amino acid aminotransferase
RHE_RS13980	Rhizobium_etli_GCF_000092045.1_ASM9204v1	100.00	0.0	0.0441136709689354	-	branched-chain amino acid aminotransferase
REMIM1_RS13825	Rhizobium_etli_GCF_000442435.1_ASM44243v1	99.73	0.0	0.0322757399025723	-	branched-chain amino acid aminotransferase
RL_RS16495	Rhizobium_leguminosarum_GCF_000009265.1_ASM926v1	93.99	0.0	0.0541175685643647	-	branched-chain amino acid aminotransferase
NGR_c35490	Sinorhizobium_fredii_GCF_000018545.1_ASM1854v1	61.43	2e-156	0.0480888639930667	ilvE	branched-chain amino acid aminotransferase
SMc02896	Sinorhizobium_meliloti_GCF_000006965.1_ASM696v1	59.71	2e-149	0.0359259924555416	ilvE1	branched-chain amino acid aminotransferase
/home/htaboada/sp27/red_etli/bin/footprint_discovery_enero_2018/etli_23_Feb_2018/Rhizobiales/Rhizobium_etli_GCF_000092045.1_ASM9204v1/RHE_RS20020/RHE_RS20020_Rhizobium_etli_GCF_000092045.1_ASM9204v1_Rhizobiales_taxfreq_ortho_bbh.tab
AAV28_RS41245	Bradyrhizobium_diazoefficiens_GCF_001642675.1_ASM164267v1	47.02	1e-45	0.0307267670524778	-	MULTISPECIES: N-acetyltransferase
BBTA_RS01285	Bradyrhizobium_sp._BTAi1_GCF_000015165.1_ASM1516v1	45.83	6e-44	0.0360036396406619	-	MULTISPECIES: N-acetyltransferase
MAFF_RS17155	Mesorhizobium_loti_GCF_000009625.1_ASM962v1	59.28	2e-71	0.0293984072145719	-	MULTISPECIES: N-acetyltransferase
RHE_RS20020	Rhizobium_etli_GCF_000092045.1_ASM9204v1	100.00	3e-126	0.0438290666401036	-	MULTISPECIES: N-acetyltransferase
REMIM1_RS19790	Rhizobium_etli_GCF_000442435.1_ASM44243v1	100.00	4e-126	0.0392813268581694	-	MULTISPECIES: N-acetyltransferase
RL_RS23215	Rhizobium_leguminosarum_GCF_000009265.1_ASM926v1	93.45	3e-118	0.0244641063373155	-	MULTISPECIES: N-acetyltransferase
NGR_c32010	Sinorhizobium_fredii_GCF_000018545.1_ASM1854v1	68.45	2e-88	0.0330280659293041	-	N-acetyltransferase
SMc03241	Sinorhizobium_meliloti_GCF_000006965.1_ASM696v1	69.64	3e-89	0.0293219497247435	-	hypothetical protein SMc03241
AZC_RS03465	Azorhizobium_caulinodans_GCF_000010525.1_ASM1052v1	47.62	2e-49	0.0512694044961321	-	N-acetyltransferase
/home/htaboada/sp27/red_etli/bin/footprint_discovery_enero_2018/etli_23_Feb_2018/Rhizobiales/Rhizobium_etli_GCF_000092045.1_ASM9204v1/RHE_RS15255/RHE_RS15255_Rhizobium_etli_GCF_000092045.1_ASM9204v1_Rhizobiales_taxfreq_ortho_bbh.tab
AAV28_RS14335	Bradyrhizobium_diazoefficiens_GCF_001642675.1_ASM164267v1	69.39	0.0	0.0263372289021238	-	MULTISPECIES: ABC transporter substrate-binding protein
MAFF_RS21725	Mesorhizobium_loti_GCF_000009625.1_ASM962v1	74.36	0.0	0.0403467795565504	-	carbohydrate ABC transporter substrate-binding protein
RHE_RS15255	Rhizobium_etli_GCF_000092045.1_ASM9204v1	100.00	0.0	0.0438290666401036	-	carbohydrate ABC transporter substrate-binding protein
REMIM1_RS15025	Rhizobium_etli_GCF_000442435.1_ASM44243v1	99.77	0.0	0.0382805287216555	-	carbohydrate ABC transporter substrate-binding protein
RL_RS14975	Rhizobium_leguminosarum_GCF_000009265.1_ASM926v1	72.20	0.0	0.042256183673545	-	carbohydrate ABC transporter substrate-binding protein
NGR_b04010	Sinorhizobium_fredii_GCF_000018545.1_ASM1854v1	65.82	0.0	0.0591862941453129	-	UgpB, ABC-type sugar transport system, periplasmic component UgpB (plasmid)
/home/htaboada/sp27/red_etli/bin/footprint_discovery_enero_2018/etli_23_Feb_2018/Rhizobiales/Rhizobium_etli_GCF_000092045.1_ASM9204v1/RHE_RS03645/RHE_RS03645_Rhizobium_etli_GCF_000092045.1_ASM9204v1_Rhizobiales_taxfreq_ortho_bbh.tab
AAV28_RS34035	Bradyrhizobium_diazoefficiens_GCF_001642675.1_ASM164267v1	41.33	7e-108	0.0256349027980672	-	MULTISPECIES: histidine kinase
BBTA_RS31915	Bradyrhizobium_sp._BTAi1_GCF_000015165.1_ASM1516v1	39.96	8e-106
MAFF_RS26705	Mesorhizobium_loti_GCF_000009625.1_ASM962v1	57.32	1e-179	0.0356835839294114	-	PAS domain S-box protein
RHE_RS03645	Rhizobium_etli_GCF_000092045.1_ASM9204v1	100.00	0.0	0.0438290666401036	-	PAS domain-containing sensor histidine kinase
REMIM1_RS04045	Rhizobium_etli_GCF_000442435.1_ASM44243v1	98.42	0.0	0.0397817259264263	-	PAS domain S-box protein
RL_RS04030	Rhizobium_leguminosarum_GCF_000009265.1_ASM926v1	78.66	0.0	0.055229573397879	-	PAS domain-containing sensor histidine kinase
NGR_c03350	Sinorhizobium_fredii_GCF_000018545.1_ASM1854v1	58.58	0.0	0.0359345357310828	-	sensor histidine kinase protein with ATP-binding domain
SMc00776	Sinorhizobium_meliloti_GCF_000006965.1_ASM696v1	59.56	0.0	0.0369826392924693	-	sensor histidine kinase
/home/htaboada/sp27/red_etli/bin/footprint_discovery_enero_2018/etli_23_Feb_2018/Rhizobiales/Rhizobium_etli_GCF_000092045.1_ASM9204v1/RHE_RS01930/RHE_RS01930_Rhizobium_etli_GCF_000092045.1_ASM9204v1_Rhizobiales_taxfreq_ortho_bbh.tab
AAV28_RS00855	Bradyrhizobium_diazoefficiens_GCF_001642675.1_ASM164267v1	48.47	1e-38	0.0198407124396	-	MULTISPECIES: universal stress protein A
BBTA_RS00185	Bradyrhizobium_sp._BTAi1_GCF_000015165.1_ASM1516v1	48.78	5e-41	0.0327305814915108	-	universal stress protein
MAFF_RS21785	Mesorhizobium_loti_GCF_000009625.1_ASM962v1	63.80	5e-70	0.0180445396006683	-	MULTISPECIES: universal stress protein
RHE_RS01930	Rhizobium_etli_GCF_000092045.1_ASM9204v1	100.00	7e-109	0.0438290666401036	-	MULTISPECIES: universal stress protein
REMIM1_RS02345	Rhizobium_etli_GCF_000442435.1_ASM44243v1	100.00	8e-109	0.0405323245288117	-	MULTISPECIES: universal stress protein
RL_RS02085	Rhizobium_leguminosarum_GCF_000009265.1_ASM926v1	98.16	9e-105	0.0337308132832684	-	MULTISPECIES: universal stress protein
NGR_c00360	Sinorhizobium_fredii_GCF_000018545.1_ASM1854v1	86.42	8e-92	0.0161176961735004	-	universal stress protein UspA
SMc01120	Sinorhizobium_meliloti_GCF_000006965.1_ASM696v1	85.89	3e-93	0.0280011411785839	-	hypothetical protein SMc01120
AZC_RS23985	Azorhizobium_caulinodans_GCF_000010525.1_ASM1052v1	54.55	1e-40	0.0292040911686828	-	universal stress protein UspA
/home/htaboada/sp27/red_etli/bin/footprint_discovery_enero_2018/etli_23_Feb_2018/Rhizobiales/Rhizobium_etli_GCF_000092045.1_ASM9204v1/RHE_RS28380/RHE_RS28380_Rhizobium_etli_GCF_000092045.1_ASM9204v1_Rhizobiales_taxfreq_ortho_bbh.tab
RHE_RS28380	Rhizobium_etli_GCF_000092045.1_ASM9204v1	100.00	0.0	0.0435444623112718	-	sugar ABC transporter permease
REMIM1_RS32090	Rhizobium_etli_GCF_000442435.1_ASM44243v1	100.00	0.0	0.0447857166089957	-	sugar ABC transporter permease
RL_RS35875	Rhizobium_leguminosarum_GCF_000009265.1_ASM926v1	98.01	0.0	0.0329894767275922	-	sugar ABC transporter permease
SMa1339	Sinorhizobium_meliloti_GCF_000006965.1_ASM696v1	93.69	0.0	0.0375109627109331	-	ABC transporter permease (plasmid)
/home/htaboada/sp27/red_etli/bin/footprint_discovery_enero_2018/etli_23_Feb_2018/Rhizobiales/Rhizobium_etli_GCF_000092045.1_ASM9204v1/RHE_RS02485/RHE_RS02485_Rhizobium_etli_GCF_000092045.1_ASM9204v1_Rhizobiales_taxfreq_ortho_bbh.tab
MAFF_RS14095	Mesorhizobium_loti_GCF_000009625.1_ASM962v1	69.74	0.0	0.0223022399558821	-	sugar ABC transporter ATP-binding protein
RHE_RS02485	Rhizobium_etli_GCF_000092045.1_ASM9204v1	100.00	0.0	0.0435444623112718	-	sugar ABC transporter ATP-binding protein
REMIM1_RS02905	Rhizobium_etli_GCF_000442435.1_ASM44243v1	99.81	0.0	0.0405323245288117	-	sugar ABC transporter ATP-binding protein
RL_RS02700	Rhizobium_leguminosarum_GCF_000009265.1_ASM926v1	94.97	0.0	0.0426268519513831	-	sugar ABC transporter ATP-binding protein
NGR_c33690	Sinorhizobium_fredii_GCF_000018545.1_ASM1854v1	81.94	0.0	0.0343491885664762	-	sugar ABC transporter ATP-binding protein
SMc02773	Sinorhizobium_meliloti_GCF_000006965.1_ASM696v1	80.58	0.0	0.0385676095478608	-	ABC transporter ATP-binding protein
/home/htaboada/sp27/red_etli/bin/footprint_discovery_enero_2018/etli_23_Feb_2018/Rhizobiales/Rhizobium_etli_GCF_000092045.1_ASM9204v1/RHE_RS02075/RHE_RS02075_Rhizobium_etli_GCF_000092045.1_ASM9204v1_Rhizobiales_taxfreq_ortho_bbh.tab
AAV28_RS37580	Bradyrhizobium_diazoefficiens_GCF_001642675.1_ASM164267v1	52.34	4e-117	0.0261616473761097	-	MULTISPECIES: DNA recombination protein RmuC
BBTA_RS34335	Bradyrhizobium_sp._BTAi1_GCF_000015165.1_ASM1516v1	51.38	8e-116
MAFF_RS19975	Mesorhizobium_loti_GCF_000009625.1_ASM962v1	70.59	4e-179	0.0261544450391708	-	DNA recombination protein RmuC
RHE_RS02075	Rhizobium_etli_GCF_000092045.1_ASM9204v1	100.00	0.0	0.0435444623112718	-	DNA recombination protein RmuC
REMIM1_RS02490	Rhizobium_etli_GCF_000442435.1_ASM44243v1	100.00	0.0	0.0387809277899125	-	DNA recombination protein RmuC
RL_RS02230	Rhizobium_leguminosarum_GCF_000009265.1_ASM926v1	93.13	0.0	0.0285414573935348	-	DNA recombination protein RmuC
NGR_c00550	Sinorhizobium_fredii_GCF_000018545.1_ASM1854v1	71.88	0.0	0.0243086565239678	-	DNA recombination protein RmuC
SMc01102	Sinorhizobium_meliloti_GCF_000006965.1_ASM696v1	72.07	0.0	0.0301144348524393	-	hypothetical protein SMc01102
AZC_RS04070	Azorhizobium_caulinodans_GCF_000010525.1_ASM1052v1	49.85	2e-116	0.0590571621411142	-	DNA recombination protein RmuC
/home/htaboada/sp27/red_etli/bin/footprint_discovery_enero_2018/etli_23_Feb_2018/Rhizobiales/Rhizobium_etli_GCF_000092045.1_ASM9204v1/RHE_RS19965/RHE_RS19965_Rhizobium_etli_GCF_000092045.1_ASM9204v1_Rhizobiales_taxfreq_ortho_bbh.tab
AAV28_RS41355	Bradyrhizobium_diazoefficiens_GCF_001642675.1_ASM164267v1	57.02	3e-119	0.0270395550061805	-	tRNA (adenosine(37)-N6)-threonylcarbamoyltransferase complex transferase subunit TsaD
BBTA_RS01395	Bradyrhizobium_sp._BTAi1_GCF_000015165.1_ASM1516v1	58.91	8e-124	0.0357854357640518	tsaD	tRNA (adenosine(37)-N6)-threonylcarbamoyltransferase complex transferase subunit TsaD
MAFF_RS17525	Mesorhizobium_loti_GCF_000009625.1_ASM962v1	68.32	1e-152	0.0450099751836894	-	tRNA (adenosine(37)-N6)-threonylcarbamoyltransferase complex transferase subunit TsaD
RHE_RS19965	Rhizobium_etli_GCF_000092045.1_ASM9204v1	100.00	0.0	0.0432598579824399	tsaD	tRNA (adenosine(37)-N6)-threonylcarbamoyltransferase complex transferase subunit TsaD
REMIM1_RS19735	Rhizobium_etli_GCF_000442435.1_ASM44243v1	99.45	0.0	0.038530728255784	-	tRNA (adenosine(37)-N6)-threonylcarbamoyltransferase complex transferase subunit TsaD
RL_RS23160	Rhizobium_leguminosarum_GCF_000009265.1_ASM926v1	95.62	0.0	0.0263174477265061	-	tRNA (adenosine(37)-N6)-threonylcarbamoyltransferase complex transferase subunit TsaD
NGR_c32120	Sinorhizobium_fredii_GCF_000018545.1_ASM1854v1	80.55	0.0	0.035406086676214	-	DNA-binding
SMc03230	Sinorhizobium_meliloti_GCF_000006965.1_ASM696v1	80.33	0.0	0.0340768604909181	gcp	DNA-binding
AZC_RS01330	Azorhizobium_caulinodans_GCF_000010525.1_ASM1052v1	61.22	3e-126	0.044779606458647	-	tRNA (adenosine(37)-N6)-threonylcarbamoyltransferase complex transferase subunit TsaD
/home/htaboada/sp27/red_etli/bin/footprint_discovery_enero_2018/etli_23_Feb_2018/Rhizobiales/Rhizobium_etli_GCF_000092045.1_ASM9204v1/RHE_RS12540/RHE_RS12540_Rhizobium_etli_GCF_000092045.1_ASM9204v1_Rhizobiales_taxfreq_ortho_bbh.tab
RHE_RS12540	Rhizobium_etli_GCF_000092045.1_ASM9204v1	100.00	0.0	0.0432598579824399	-	glycoside hydrolase family 43 protein
REMIM1_RS12375	Rhizobium_etli_GCF_000442435.1_ASM44243v1	99.44	0.0	0.0400319254605548	-	glycoside hydrolase family 43 protein
RL_RS14400	Rhizobium_leguminosarum_GCF_000009265.1_ASM926v1	94.04	0.0	0.0474455395632786	-	glycoside hydrolase family 43 protein
NGR_c17670	Sinorhizobium_fredii_GCF_000018545.1_ASM1854v1	78.96	0.0	0.0478246394656323	xynA	beta-xylosidase
SMc04247	Sinorhizobium_meliloti_GCF_000006965.1_ASM696v1	78.73	0.0	0.0509832098817612	-	beta-xylosidase
/home/htaboada/sp27/red_etli/bin/footprint_discovery_enero_2018/etli_23_Feb_2018/Rhizobiales/Rhizobium_etli_GCF_000092045.1_ASM9204v1/RHE_RS08810/RHE_RS08810_Rhizobium_etli_GCF_000092045.1_ASM9204v1_Rhizobiales_taxfreq_ortho_bbh.tab
AAV28_RS20955	Bradyrhizobium_diazoefficiens_GCF_001642675.1_ASM164267v1	45.39	8e-75	0.0191383863355433	-	MULTISPECIES: sugar ABC transporter permease
MAFF_RS13025	Mesorhizobium_loti_GCF_000009625.1_ASM962v1	87.70	0.0	0.0472401991792776	-	sugar ABC transporter permease
RHE_RS18960	Rhizobium_etli_GCF_000092045.1_ASM9204v1	100.00	0.0
REMIM1_RS08970	Rhizobium_etli_GCF_000442435.1_ASM44243v1	100.00	0.0	0.0407825240629402	-	sugar ABC transporter permease
RL_RS21910	Rhizobium_leguminosarum_GCF_000009265.1_ASM926v1	96.53	0.0
NGR_c33070	Sinorhizobium_fredii_GCF_000018545.1_ASM1854v1	65.20	5e-136	0.0523164564320177	-	binding-protein-dependent transport system inner membrane protein
SMc04395	Sinorhizobium_meliloti_GCF_000006965.1_ASM696v1	63.51	9e-135	0.0594363845771828	-	ABC transporter permease
/home/htaboada/sp27/red_etli/bin/footprint_discovery_enero_2018/etli_23_Feb_2018/Rhizobiales/Rhizobium_etli_GCF_000092045.1_ASM9204v1/RHE_RS04685/RHE_RS04685_Rhizobium_etli_GCF_000092045.1_ASM9204v1_Rhizobiales_taxfreq_ortho_bbh.tab
RHE_RS04685	Rhizobium_etli_GCF_000092045.1_ASM9204v1	100.00	7e-147	0.0432598579824399	-	biotin transport ATP-binding protein BioM
REMIM1_RS05110	Rhizobium_etli_GCF_000442435.1_ASM44243v1	100.00	8e-147	0.0410327235970687	-	biotin transport ATP-binding protein BioM
RL_RS05220	Rhizobium_leguminosarum_GCF_000009265.1_ASM926v1	91.26	4e-135	0.0404028422843545	-	ABC transporter ATP-binding protein
NGR_c05060	Sinorhizobium_fredii_GCF_000018545.1_ASM1854v1	65.22	2e-92	0.0179672678655414	bioM	biotin transporter, ATP binding protein BioM
SMc00962	Sinorhizobium_meliloti_GCF_000006965.1_ASM696v1	67.15	2e-94	0.0322277285262947	-	ABC transporter ATP-binding protein
AZC_RS19345	Azorhizobium_caulinodans_GCF_000010525.1_ASM1052v1	42.70	2e-39
/home/htaboada/sp27/red_etli/bin/footprint_discovery_enero_2018/etli_23_Feb_2018/Rhizobiales/Rhizobium_etli_GCF_000092045.1_ASM9204v1/RHE_RS00190/RHE_RS00190_Rhizobium_etli_GCF_000092045.1_ASM9204v1_Rhizobiales_taxfreq_ortho_bbh.tab
AAV28_RS37740	Bradyrhizobium_diazoefficiens_GCF_001642675.1_ASM164267v1	65.06	0.0	0.0370477019889875	-	MULTISPECIES: phosphoenolpyruvate carboxykinase (ATP)
BBTA_RS34470	Bradyrhizobium_sp._BTAi1_GCF_000015165.1_ASM1516v1	65.24	0.0
MAFF_RS20885	Mesorhizobium_loti_GCF_000009625.1_ASM962v1	77.43	0.0	0.0340616028417109	-	phosphoenolpyruvate carboxykinase (ATP)
RHE_RS00190	Rhizobium_etli_GCF_000092045.1_ASM9204v1	100.00	0.0	0.0432598579824399	-	phosphoenolpyruvate carboxykinase (ATP)
REMIM1_RS00630	Rhizobium_etli_GCF_000442435.1_ASM44243v1	100.00	0.0	0.0412829231311971	-	phosphoenolpyruvate carboxykinase (ATP)
RL_RS00185	Rhizobium_leguminosarum_GCF_000009265.1_ASM926v1	94.59	0.0	0.0396615057286782	-	phosphoenolpyruvate carboxykinase (ATP)
NGR_c33940	Sinorhizobium_fredii_GCF_000018545.1_ASM1854v1	78.73	0.0	0.0515237828497144	pckA	phosphoenolpyruvate carboxykinase
SMc02562	Sinorhizobium_meliloti_GCF_000006965.1_ASM696v1	79.85	0.0	0.0388317712570927	pckA	phosphoenolpyruvate carboxykinase
AZC_RS20835	Azorhizobium_caulinodans_GCF_000010525.1_ASM1052v1	70.76	0.0	0.140828617413426	-	phosphoenolpyruvate carboxykinase (ATP)
/home/htaboada/sp27/red_etli/bin/footprint_discovery_enero_2018/etli_23_Feb_2018/Rhizobiales/Rhizobium_etli_GCF_000092045.1_ASM9204v1/RHE_RS20550/RHE_RS20550_Rhizobium_etli_GCF_000092045.1_ASM9204v1_Rhizobiales_taxfreq_ortho_bbh.tab
AAV28_RS15090	Bradyrhizobium_diazoefficiens_GCF_001642675.1_ASM164267v1	70.95	7e-130	0.0259860658500955	-	MULTISPECIES: beta-ketoacyl-ACP reductase
BBTA_RS35625	Bradyrhizobium_sp._BTAi1_GCF_000015165.1_ASM1516v1	71.25	2e-123
MAFF_RS16145	Mesorhizobium_loti_GCF_000009625.1_ASM962v1	74.69	6e-138	0.0324396217540103	-	beta-ketoacyl-ACP reductase
RHE_RS20550	Rhizobium_etli_GCF_000092045.1_ASM9204v1	100.00	0.0	0.0429752536536081	-	beta-ketoacyl-ACP reductase
REMIM1_RS20320	Rhizobium_etli_GCF_000442435.1_ASM44243v1	100.00	0.0	0.0365291319827563	-	beta-ketoacyl-ACP reductase
RL_RS23795	Rhizobium_leguminosarum_GCF_000009265.1_ASM926v1	95.00	3e-172	0.0274294525600205	-	beta-ketoacyl-ACP reductase
NGR_c32710	Sinorhizobium_fredii_GCF_000018545.1_ASM1854v1	84.58	2e-155	0.0420116998620748	-	acetoacetyl-CoA reductase
SMc03878	Sinorhizobium_meliloti_GCF_000006965.1_ASM696v1	82.50	5e-151	0.0348693456186139	phbB	acetoacetyl-CoA reductase
AZC_RS01550	Azorhizobium_caulinodans_GCF_000010525.1_ASM1052v1	73.33	1e-126
/home/htaboada/sp27/red_etli/bin/footprint_discovery_enero_2018/etli_23_Feb_2018/Rhizobiales/Rhizobium_etli_GCF_000092045.1_ASM9204v1/RHE_RS17535/RHE_RS17535_Rhizobium_etli_GCF_000092045.1_ASM9204v1_Rhizobiales_taxfreq_ortho_bbh.tab
AAV28_RS13785	Bradyrhizobium_diazoefficiens_GCF_001642675.1_ASM164267v1	32.41	5e-15
BBTA_RS28545	Bradyrhizobium_sp._BTAi1_GCF_000015165.1_ASM1516v1	31.48	1e-08
RHE_RS17535	Rhizobium_etli_GCF_000092045.1_ASM9204v1	100.00	3e-106	0.0429752536536081	-	tripartite tricarboxylate transporter TctB family protein
REMIM1_RS17300	Rhizobium_etli_GCF_000442435.1_ASM44243v1	98.69	2e-105	0.0392813268581694	-	tripartite tricarboxylate transporter TctB family protein
RL_RS20080	Rhizobium_leguminosarum_GCF_000009265.1_ASM926v1	88.89	8e-89	0.0504108857859836	-	tripartite tricarboxylate transporter TctB family protein
NGR_b00360	Sinorhizobium_fredii_GCF_000018545.1_ASM1854v1	68.63	6e-66	0.0602431922550507	-	hypothetical protein NGR_b00360 (plasmid)
SM_b20026	Sinorhizobium_meliloti_GCF_000006965.1_ASM696v1	69.93	3e-68	0.0623421633787339	-	hypothetical protein SM_b20026 (plasmid)
AZC_RS18250	Azorhizobium_caulinodans_GCF_000010525.1_ASM1052v1	40.77	8e-25	0.092155132132288	-	tripartite tricarboxylate transporter TctB family protein
/home/htaboada/sp27/red_etli/bin/footprint_discovery_enero_2018/etli_23_Feb_2018/Rhizobiales/Rhizobium_etli_GCF_000092045.1_ASM9204v1/RHE_RS13605/RHE_RS13605_Rhizobium_etli_GCF_000092045.1_ASM9204v1_Rhizobiales_taxfreq_ortho_bbh.tab
RHE_RS13605	Rhizobium_etli_GCF_000092045.1_ASM9204v1	100.00	0.0	0.0429752536536081	-	sugar ABC transporter permease
REMIM1_RS13435	Rhizobium_etli_GCF_000442435.1_ASM44243v1	96.94	0.0	0.0425339208018395	-	sugar ABC transporter permease
RL_RS16035	Rhizobium_leguminosarum_GCF_000009265.1_ASM926v1	91.50	0.0	0.038920169173002	-	sugar ABC transporter permease
SMa2307	Sinorhizobium_meliloti_GCF_000006965.1_ASM696v1	83.33	6e-164	0.0515115333002251	-	ABC transporter permease (plasmid)
/home/htaboada/sp27/red_etli/bin/footprint_discovery_enero_2018/etli_23_Feb_2018/Rhizobiales/Rhizobium_etli_GCF_000092045.1_ASM9204v1/RHE_RS10775/RHE_RS10775_Rhizobium_etli_GCF_000092045.1_ASM9204v1_Rhizobiales_taxfreq_ortho_bbh.tab
AAV28_RS21515	Bradyrhizobium_diazoefficiens_GCF_001642675.1_ASM164267v1	49.20	2e-90	0.023176761433869	-	MULTISPECIES: bifunctional ADP-dependent NAD(P)H-hydrate dehydratase
BBTA_RS21415	Bradyrhizobium_sp._BTAi1_GCF_000015165.1_ASM1516v1	49.43	2e-93
MAFF_RS02410	Mesorhizobium_loti_GCF_000009625.1_ASM962v1	49.90	9e-111	0.0220994923199196	-	bifunctional ADP-dependent NAD(P)H-hydrate dehydratase
RHE_RS10775	Rhizobium_etli_GCF_000092045.1_ASM9204v1	100.00	0.0	0.0429752536536081	-	bifunctional ADP-dependent NAD(P)H-hydrate dehydratase/NAD(P)H-hydrate epimerase
REMIM1_RS10620	Rhizobium_etli_GCF_000442435.1_ASM44243v1	99.80	0.0	0.0365291319827563	-	bifunctional ADP-dependent NAD(P)H-hydrate dehydratase/NAD(P)H-hydrate epimerase
RL_RS12350	Rhizobium_leguminosarum_GCF_000009265.1_ASM926v1	87.55	0.0	0.0341014815611065	-	bifunctional ADP-dependent NAD(P)H-hydrate dehydratase
NGR_c14760	Sinorhizobium_fredii_GCF_000018545.1_ASM1854v1	57.84	5e-149	0.0187599414478447	-	carbohydrate kinase protein
SMc00946	Sinorhizobium_meliloti_GCF_000006965.1_ASM696v1	60.08	3e-144	0.0245670389585689	-	hypothetical protein SMc00946
AZC_RS08310	Azorhizobium_caulinodans_GCF_000010525.1_ASM1052v1	50.92	2e-93	0.0623020611598567	-	bifunctional ADP-dependent NAD(P)H-hydrate dehydratase
/home/htaboada/sp27/red_etli/bin/footprint_discovery_enero_2018/etli_23_Feb_2018/Rhizobiales/Rhizobium_etli_GCF_000092045.1_ASM9204v1/RHE_RS03540/RHE_RS03540_Rhizobium_etli_GCF_000092045.1_ASM9204v1_Rhizobiales_taxfreq_ortho_bbh.tab
MAFF_RS20925	Mesorhizobium_loti_GCF_000009625.1_ASM962v1	70.83	0.0	0.0332506122978606	-	ABC transporter ATP-binding protein
RHE_RS03540	Rhizobium_etli_GCF_000092045.1_ASM9204v1	100.00	0.0	0.0429752536536081	-	ABC transporter ATP-binding protein
REMIM1_RS03940	Rhizobium_etli_GCF_000442435.1_ASM44243v1	99.45	0.0	0.0415331226653256	-	sn-glycerol-3-phosphate ABC transporter ATP-binding protein UgpC
RL_RS03925	Rhizobium_leguminosarum_GCF_000009265.1_ASM926v1	96.41	0.0	0.0352134863946209	-	ABC transporter ATP-binding protein
NGR_c03140	Sinorhizobium_fredii_GCF_000018545.1_ASM1854v1	82.27	0.0	0.0385767810054272	-	alpha-glucoside ABC transporter, ATP-binding protein
SMc03065	Sinorhizobium_meliloti_GCF_000006965.1_ASM696v1	82.55	0.0	0.031171081689367	aglK	alpha-glucoside ABC transporter ATP-binding protein
/home/htaboada/sp27/red_etli/bin/footprint_discovery_enero_2018/etli_23_Feb_2018/Rhizobiales/Rhizobium_etli_GCF_000092045.1_ASM9204v1/RHE_RS00270/RHE_RS00270_Rhizobium_etli_GCF_000092045.1_ASM9204v1_Rhizobiales_taxfreq_ortho_bbh.tab
AAV28_RS04300	Bradyrhizobium_diazoefficiens_GCF_001642675.1_ASM164267v1	61.36	0.0	0.0560105067985167	-	MULTISPECIES: malate synthase G
BBTA_RS32745	Bradyrhizobium_sp._BTAi1_GCF_000015165.1_ASM1516v1	62.33	0.0
MAFF_RS19185	Mesorhizobium_loti_GCF_000009625.1_ASM962v1	75.38	0.0	0.0362918268372991	-	malate synthase G
RHE_RS00270	Rhizobium_etli_GCF_000092045.1_ASM9204v1	100.00	0.0	0.0429752536536081	-	malate synthase G
REMIM1_RS00710	Rhizobium_etli_GCF_000442435.1_ASM44243v1	99.86	0.0	0.0410327235970687	-	malate synthase G
RL_RS00270	Rhizobium_leguminosarum_GCF_000009265.1_ASM926v1	91.70	0.0	0.0322481401719159	-	malate synthase G
NGR_c34110	Sinorhizobium_fredii_GCF_000018545.1_ASM1854v1	77.46	0.0	0.0467677413558946	glcB	malate synthase G
SMc02581	Sinorhizobium_meliloti_GCF_000006965.1_ASM696v1	79.39	0.0	0.0221895835754816	glcB	malate synthase G
/home/htaboada/sp27/red_etli/bin/footprint_discovery_enero_2018/etli_23_Feb_2018/Rhizobiales/Rhizobium_etli_GCF_000092045.1_ASM9204v1/RHE_RS16420/RHE_RS16420_Rhizobium_etli_GCF_000092045.1_ASM9204v1_Rhizobiales_taxfreq_ortho_bbh.tab
RHE_RS16420	Rhizobium_etli_GCF_000092045.1_ASM9204v1	100.00	2e-162	0.0426906493247762	-	class I SAM-dependent methyltransferase
REMIM1_RS16175	Rhizobium_etli_GCF_000442435.1_ASM44243v1	99.57	1e-160	0.0312749417660584	-	class I SAM-dependent methyltransferase
/home/htaboada/sp27/red_etli/bin/footprint_discovery_enero_2018/etli_23_Feb_2018/Rhizobiales/Rhizobium_etli_GCF_000092045.1_ASM9204v1/RHE_RS05615/RHE_RS05615_Rhizobium_etli_GCF_000092045.1_ASM9204v1_Rhizobiales_taxfreq_ortho_bbh.tab
MAFF_RS02870	Mesorhizobium_loti_GCF_000009625.1_ASM962v1	28.15	2e-23
RHE_RS05615	Rhizobium_etli_GCF_000092045.1_ASM9204v1	100.00	5e-176	0.0426906493247762	-	hypothetical protein
RL_RS20280	Rhizobium_leguminosarum_GCF_000009265.1_ASM926v1	71.98	2e-127	0.0118613848908197	-	hypothetical protein
NGR_c18930	Sinorhizobium_fredii_GCF_000018545.1_ASM1854v1	28.24	6e-18
/home/htaboada/sp27/red_etli/bin/footprint_discovery_enero_2018/etli_23_Feb_2018/Rhizobiales/Rhizobium_etli_GCF_000092045.1_ASM9204v1/RHE_RS04345/RHE_RS04345_Rhizobium_etli_GCF_000092045.1_ASM9204v1_Rhizobiales_taxfreq_ortho_bbh.tab
AAV28_RS41795	Bradyrhizobium_diazoefficiens_GCF_001642675.1_ASM164267v1	54.55	3e-15	0.0163290819193168	-	MULTISPECIES: hypothetical protein
BBTA_RS03980	Bradyrhizobium_sp._BTAi1_GCF_000015165.1_ASM1516v1	43.43	3e-20	0.0253116496867683	-	ATP synthase F0 subunit A\'
MAFF_RS30205	Mesorhizobium_loti_GCF_000009625.1_ASM962v1	60.47	1e-27	0.017233549056818	-	MULTISPECIES: FoF1 ATP synthase subunit I
RHE_RS04345	Rhizobium_etli_GCF_000092045.1_ASM9204v1	100.00	1e-78	0.0426906493247762	-	F0F1 ATP synthase assembly protein
REMIM1_RS04770	Rhizobium_etli_GCF_000442435.1_ASM44243v1	100.00	1e-78	0.0367793315168847	-	F0F1 ATP synthase assembly protein
RL_RS04825	Rhizobium_leguminosarum_GCF_000009265.1_ASM926v1	84.82	7e-63	0.0203867552810963	-	F0F1 ATP synthase assembly protein
NGR_c04460	Sinorhizobium_fredii_GCF_000018545.1_ASM1854v1	64.65	3e-39	0.0319711678195664	-	ATP synthase protein I
SMc00872	Sinorhizobium_meliloti_GCF_000006965.1_ASM696v1	64.95	2e-38	0.0280011411785839	atpI	FOF1 ATP synthase, subunit I transmembrane protein
AZC_RS21860	Azorhizobium_caulinodans_GCF_000010525.1_ASM1052v1	41.49	4e-21	0.0538653237111261	-	ATP synthase subunit I
/home/htaboada/sp27/red_etli/bin/footprint_discovery_enero_2018/etli_23_Feb_2018/Rhizobiales/Rhizobium_etli_GCF_000092045.1_ASM9204v1/RHE_RS05945/RHE_RS05945_Rhizobium_etli_GCF_000092045.1_ASM9204v1_Rhizobiales_taxfreq_ortho_bbh.tab
RHE_RS05945	Rhizobium_etli_GCF_000092045.1_ASM9204v1	100.00	0.0	0.0424060449959444	-	LuxR family transcriptional regulator
REMIM1_RS06185	Rhizobium_etli_GCF_000442435.1_ASM44243v1	100.00	0.0	0.0417833221994541	-	LuxR family transcriptional regulator
/home/htaboada/sp27/red_etli/bin/footprint_discovery_enero_2018/etli_23_Feb_2018/Rhizobiales/Rhizobium_etli_GCF_000092045.1_ASM9204v1/RHE_RS03725/RHE_RS03725_Rhizobium_etli_GCF_000092045.1_ASM9204v1_Rhizobiales_taxfreq_ortho_bbh.tab
AAV28_RS10900	Bradyrhizobium_diazoefficiens_GCF_001642675.1_ASM164267v1	28.46	5e-40	0.0129930329250478	-	MULTISPECIES: ABC transporter substrate-binding protein
BBTA_RS09570	Bradyrhizobium_sp._BTAi1_GCF_000015165.1_ASM1516v1	55.60	0.0
MAFF_RS22180	Mesorhizobium_loti_GCF_000009625.1_ASM962v1	61.73	0.0	0.0385220508328873	-	ABC transporter substrate-binding protein
RHE_RS03725	Rhizobium_etli_GCF_000092045.1_ASM9204v1	100.00	0.0	0.0424060449959444	-	MULTISPECIES: ABC transporter substrate-binding protein
REMIM1_RS04120	Rhizobium_etli_GCF_000442435.1_ASM44243v1	96.61	0.0	0.038530728255784	-	ABC transporter substrate-binding protein
RL_RS04080	Rhizobium_leguminosarum_GCF_000009265.1_ASM926v1	93.22	0.0	0.0315068036162397	-	ABC transporter substrate-binding protein
NGR_c03460	Sinorhizobium_fredii_GCF_000018545.1_ASM1854v1	75.33	0.0	0.0430685979718125	dppA	periplasmic dipeptide ABC transport protein precursor DppA
SMc00786	Sinorhizobium_meliloti_GCF_000006965.1_ASM696v1	74.39	0.0	0.0443791671509631	dppA1	periplasmic dipeptide-binding protein
/home/htaboada/sp27/red_etli/bin/footprint_discovery_enero_2018/etli_23_Feb_2018/Rhizobiales/Rhizobium_etli_GCF_000092045.1_ASM9204v1/RHE_RS26330/RHE_RS26330_Rhizobium_etli_GCF_000092045.1_ASM9204v1_Rhizobiales_taxfreq_ortho_bbh.tab
AAV28_RS09205	Bradyrhizobium_diazoefficiens_GCF_001642675.1_ASM164267v1	48.04	8e-79
BBTA_RS22295	Bradyrhizobium_sp._BTAi1_GCF_000015165.1_ASM1516v1	65.33	8e-124
MAFF_RS35270	Mesorhizobium_loti_GCF_000009625.1_ASM962v1	61.26	4e-115	0.0308176406663098	-	membrane protein
RHE_RS26330	Rhizobium_etli_GCF_000092045.1_ASM9204v1	100.00	0.0	0.0421214406671125	-	nicotinic acid mononucleotide biosynthesis protein
REMIM1_RS26580	Rhizobium_etli_GCF_000442435.1_ASM44243v1	100.00	0.0	0.0427841203359679	-	nicotinic acid mononucleotide biosynthesis protein
RL_RS32875	Rhizobium_leguminosarum_GCF_000009265.1_ASM926v1	96.98	0.0	0.0240934380594774	-	membrane protein
NGR_c08530	Sinorhizobium_fredii_GCF_000018545.1_ASM1854v1	50.00	4e-78
SMc02565	Sinorhizobium_meliloti_GCF_000006965.1_ASM696v1	48.04	3e-76
/home/htaboada/sp27/red_etli/bin/footprint_discovery_enero_2018/etli_23_Feb_2018/Rhizobiales/Rhizobium_etli_GCF_000092045.1_ASM9204v1/RHE_RS25305/RHE_RS25305_Rhizobium_etli_GCF_000092045.1_ASM9204v1_Rhizobiales_taxfreq_ortho_bbh.tab
MAFF_RS04530	Mesorhizobium_loti_GCF_000009625.1_ASM962v1	66.67	6e-104	0.0310203883022724	-	sugar ABC transporter permease
RHE_RS25305	Rhizobium_etli_GCF_000092045.1_ASM9204v1	100.00	0.0	0.0421214406671125	-	sugar ABC transporter permease
REMIM1_RS25550	Rhizobium_etli_GCF_000442435.1_ASM44243v1	100.00	0.0	0.0372797305851417	-	sugar ABC transporter permease
RL_RS31600	Rhizobium_leguminosarum_GCF_000009265.1_ASM926v1	95.50	0.0	0.0303947987827254	-	MULTISPECIES: sugar ABC transporter permease
NGR_c25480	Sinorhizobium_fredii_GCF_000018545.1_ASM1854v1	85.86	3e-162	0.043332822499247	-	ABC transporter permease
SMc01978	Sinorhizobium_meliloti_GCF_000006965.1_ASM696v1	86.21	6e-162	0.0319635668170627	-	sugar transport system permease ABC transporter protein
/home/htaboada/sp27/red_etli/bin/footprint_discovery_enero_2018/etli_23_Feb_2018/Rhizobiales/Rhizobium_etli_GCF_000092045.1_ASM9204v1/RHE_RS24090/RHE_RS24090_Rhizobium_etli_GCF_000092045.1_ASM9204v1_Rhizobiales_taxfreq_ortho_bbh.tab
RHE_RS24090	Rhizobium_etli_GCF_000092045.1_ASM9204v1	100.00	3e-89	0.0421214406671125	-	response regulator
REMIM1_RS24305	Rhizobium_etli_GCF_000442435.1_ASM44243v1	98.63	5e-87	0.0397817259264263	-	response regulator
RL_RS29840	Rhizobium_leguminosarum_GCF_000009265.1_ASM926v1	97.26	4e-86	0.0381788326173258	-	response regulator
/home/htaboada/sp27/red_etli/bin/footprint_discovery_enero_2018/etli_23_Feb_2018/Rhizobiales/Rhizobium_etli_GCF_000092045.1_ASM9204v1/RHE_RS22155/RHE_RS22155_Rhizobium_etli_GCF_000092045.1_ASM9204v1_Rhizobiales_taxfreq_ortho_bbh.tab
AAV28_RS15915	Bradyrhizobium_diazoefficiens_GCF_001642675.1_ASM164267v1	57.54	1e-108	0.0222988538037982	-	MULTISPECIES: dihydrodipicolinate synthase family protein
RHE_RS22155	Rhizobium_etli_GCF_000092045.1_ASM9204v1	100.00	0.0	0.0421214406671125	-	dihydrodipicolinate synthase family protein
REMIM1_RS21140	Rhizobium_etli_GCF_000442435.1_ASM44243v1	99.67	0.0	0.0360287329144993	-	dihydrodipicolinate synthase family protein
RL_RS26375	Rhizobium_leguminosarum_GCF_000009265.1_ASM926v1	94.30	0.0	0.0285414573935348	-	dihydrodipicolinate synthase family protein
NGR_b17190	Sinorhizobium_fredii_GCF_000018545.1_ASM1854v1	75.42	2e-158	0.0406905772249026	-	dihydrodipicolinate synthase (plasmid)
/home/htaboada/sp27/red_etli/bin/footprint_discovery_enero_2018/etli_23_Feb_2018/Rhizobiales/Rhizobium_etli_GCF_000092045.1_ASM9204v1/RHE_RS20405/RHE_RS20405_Rhizobium_etli_GCF_000092045.1_ASM9204v1_Rhizobiales_taxfreq_ortho_bbh.tab
MAFF_RS22595	Mesorhizobium_loti_GCF_000009625.1_ASM962v1	78.43	0.0	0.0519033948064166	-	ABC transporter substrate-binding protein
RHE_RS20405	Rhizobium_etli_GCF_000092045.1_ASM9204v1	100.00	0.0	0.0421214406671125	-	ABC transporter substrate-binding protein
REMIM1_RS20175	Rhizobium_etli_GCF_000442435.1_ASM44243v1	99.82	0.0	0.0415331226653256	-	ABC transporter substrate-binding protein
RL_RS23945	Rhizobium_leguminosarum_GCF_000009265.1_ASM926v1	93.78	0.0	0.0392908374508401	-	ABC transporter substrate-binding protein
NGR_c24450	Sinorhizobium_fredii_GCF_000018545.1_ASM1854v1	82.42	0.0	0.0605074167824851	-	peptide ABC transporter substrate-binding protein
SMc01525	Sinorhizobium_meliloti_GCF_000006965.1_ASM696v1	82.60	0.0	0.0306427582709031	dppA2	dipeptide binding periplasmic protein
AZC_RS10155	Azorhizobium_caulinodans_GCF_000010525.1_ASM1052v1	30.59	1e-40	0.0636000207673537	-	ABC transporter substrate-binding protein
/home/htaboada/sp27/red_etli/bin/footprint_discovery_enero_2018/etli_23_Feb_2018/Rhizobiales/Rhizobium_etli_GCF_000092045.1_ASM9204v1/RHE_RS07975/RHE_RS07975_Rhizobium_etli_GCF_000092045.1_ASM9204v1_Rhizobiales_taxfreq_ortho_bbh.tab
AAV28_RS21645	Bradyrhizobium_diazoefficiens_GCF_001642675.1_ASM164267v1	37.68	2e-82	0.0328337453646477	-	MULTISPECIES: LPS biosynthesis protein
BBTA_RS21550	Bradyrhizobium_sp._BTAi1_GCF_000015165.1_ASM1516v1	39.86	2e-83	0.0499686877437065	-	LPS biosynthesis protein
MAFF_RS34280	Mesorhizobium_loti_GCF_000009625.1_ASM962v1	46.22	1e-113	0.0350753410215237	-	chain-length determining protein
RHE_RS07975	Rhizobium_etli_GCF_000092045.1_ASM9204v1	100.00	0.0	0.0421214406671125	-	chain-length determining protein
REMIM1_RS08135	Rhizobium_etli_GCF_000442435.1_ASM44243v1	99.59	0.0	0.0375299301192701	-	LPS biosynthesis protein
RL_RS08635	Rhizobium_leguminosarum_GCF_000009265.1_ASM926v1	88.84	0.0	0.0441095250627356	-	chain-length determining protein
NGR_c10130	Sinorhizobium_fredii_GCF_000018545.1_ASM1854v1	53.07	0.0	0.0388410055328616	-	transmembrane succinoglycan biosynthesis transport protein
SMc01795	Sinorhizobium_meliloti_GCF_000006965.1_ASM696v1	53.48	0.0	0.034605183909382	-	polysaccharide transporter
/home/htaboada/sp27/red_etli/bin/footprint_discovery_enero_2018/etli_23_Feb_2018/Rhizobiales/Rhizobium_etli_GCF_000092045.1_ASM9204v1/RHE_RS07485/RHE_RS07485_Rhizobium_etli_GCF_000092045.1_ASM9204v1_Rhizobiales_taxfreq_ortho_bbh.tab
AAV28_RS41325	Bradyrhizobium_diazoefficiens_GCF_001642675.1_ASM164267v1	41.75	4e-40	0.0151000112372177	-	MULTISPECIES: oligosaccharide deacetylase
BBTA_RS01355	Bradyrhizobium_sp._BTAi1_GCF_000015165.1_ASM1516v1	42.49	2e-41	0.0392766977898129	-	polysaccharide deacetylase family protein
RHE_RS07485	Rhizobium_etli_GCF_000092045.1_ASM9204v1	100.00	0.0	0.0421214406671125	-	polysaccharide deacetylase family protein
REMIM1_RS07660	Rhizobium_etli_GCF_000442435.1_ASM44243v1	99.64	0.0	0.0380303291875271	-	polysaccharide deacetylase family protein
AZC_RS24475	Azorhizobium_caulinodans_GCF_000010525.1_ASM1052v1	38.42	2e-35	0.0233632729349463	-	polysaccharide deacetylase family protein
/home/htaboada/sp27/red_etli/bin/footprint_discovery_enero_2018/etli_23_Feb_2018/Rhizobiales/Rhizobium_etli_GCF_000092045.1_ASM9204v1/RHE_RS18790/RHE_RS18790_Rhizobium_etli_GCF_000092045.1_ASM9204v1_Rhizobiales_taxfreq_ortho_bbh.tab
AAV28_RS00295	Bradyrhizobium_diazoefficiens_GCF_001642675.1_ASM164267v1	48.18	9e-29	0.0222988538037982	-	MULTISPECIES: cysteine biosynthesis protein
BBTA_RS00985	Bradyrhizobium_sp._BTAi1_GCF_000015165.1_ASM1516v1	54.01	2e-33	0.0336033969979511	-	cysteine biosynthesis protein
MAFF_RS21865	Mesorhizobium_loti_GCF_000009625.1_ASM962v1	57.26	5e-65	0.0257489497672457	-	cysteine biosynthesis protein
RHE_RS18790	Rhizobium_etli_GCF_000092045.1_ASM9204v1	100.00	1e-122	0.0418368363382807	-	cysteine biosynthesis protein
REMIM1_RS18560	Rhizobium_etli_GCF_000442435.1_ASM44243v1	98.73	2e-120	0.0420335217335825	-	hypothetical protein
RL_RS21705	Rhizobium_leguminosarum_GCF_000009265.1_ASM926v1	92.41	3e-110	0.0274294525600205	-	cysteine biosynthesis protein
NGR_c35380	Sinorhizobium_fredii_GCF_000018545.1_ASM1854v1	71.06	1e-83	0.0261582282160088	-	CysZ-like protein
SMc02882	Sinorhizobium_meliloti_GCF_000006965.1_ASM696v1	73.71	1e-85	0.0335485370724543	-	CysZ-like protein
AZC_RS18980	Azorhizobium_caulinodans_GCF_000010525.1_ASM1052v1	53.73	3e-36	0.0506204246923836	-	sulfate transporter family protein
/home/htaboada/sp27/red_etli/bin/footprint_discovery_enero_2018/etli_23_Feb_2018/Rhizobiales/Rhizobium_etli_GCF_000092045.1_ASM9204v1/RHE_RS16110/RHE_RS16110_Rhizobium_etli_GCF_000092045.1_ASM9204v1_Rhizobiales_taxfreq_ortho_bbh.tab
AAV28_RS24320	Bradyrhizobium_diazoefficiens_GCF_001642675.1_ASM164267v1	30.13	2e-51	0.0270395550061805	-	MULTISPECIES: MFS transporter
BBTA_RS12545	Bradyrhizobium_sp._BTAi1_GCF_000015165.1_ASM1516v1	28.32	1e-24	0.0512779110033669	-	MFS transporter
MAFF_RS13060	Mesorhizobium_loti_GCF_000009625.1_ASM962v1	31.69	2e-08	0.0320341264820852	-	MFS transporter
RHE_RS16110	Rhizobium_etli_GCF_000092045.1_ASM9204v1	100.00	0.0	0.0418368363382807	-	MFS transporter
REMIM1_RS15865	Rhizobium_etli_GCF_000442435.1_ASM44243v1	100.00	0.0	0.0377801296533986	-	MFS transporter
RL_RS18510	Rhizobium_leguminosarum_GCF_000009265.1_ASM926v1	93.06	0.0	0.0392908374508401	-	MFS transporter
SMc04362	Sinorhizobium_meliloti_GCF_000006965.1_ASM696v1	27.48	1e-36	0.0472849459525143	-	transporter
AZC_RS14780	Azorhizobium_caulinodans_GCF_000010525.1_ASM1052v1	77.85	0.0	0.0376408286174134	-	MFS transporter
/home/htaboada/sp27/red_etli/bin/footprint_discovery_enero_2018/etli_23_Feb_2018/Rhizobiales/Rhizobium_etli_GCF_000092045.1_ASM9204v1/RHE_RS12480/RHE_RS12480_Rhizobium_etli_GCF_000092045.1_ASM9204v1_Rhizobiales_taxfreq_ortho_bbh.tab
RHE_RS12480	Rhizobium_etli_GCF_000092045.1_ASM9204v1	100.00	8e-74	0.0418368363382807	-	diacylglycerol kinase
REMIM1_RS12315	Rhizobium_etli_GCF_000442435.1_ASM44243v1	99.21	4e-73	0.0392813268581694	-	diacylglycerol kinase
RL_RS14350	Rhizobium_leguminosarum_GCF_000009265.1_ASM926v1	93.70	7e-70	0.0341014815611065	-	diacylglycerol kinase
NGR_c17320	Sinorhizobium_fredii_GCF_000018545.1_ASM1854v1	53.91	5e-30
SMc04213	Sinorhizobium_meliloti_GCF_000006965.1_ASM696v1	49.58	3e-28	0.0250953623770327	dgkA	diacylglycerol kinase
/home/htaboada/sp27/red_etli/bin/footprint_discovery_enero_2018/etli_23_Feb_2018/Rhizobiales/Rhizobium_etli_GCF_000092045.1_ASM9204v1/RHE_RS11300/RHE_RS11300_Rhizobium_etli_GCF_000092045.1_ASM9204v1_Rhizobiales_taxfreq_ortho_bbh.tab
AAV28_RS24785	Bradyrhizobium_diazoefficiens_GCF_001642675.1_ASM164267v1	34.43	6e-20	0.0344139790987751	-	MULTISPECIES: hypothetical protein
BBTA_RS24460	Bradyrhizobium_sp._BTAi1_GCF_000015165.1_ASM1516v1	31.11	1e-17	0.0560783962887885	-	hypothetical protein
MAFF_RS01760	Mesorhizobium_loti_GCF_000009625.1_ASM962v1	41.33	2e-47	0.0320341264820852	-	hypothetical protein
RHE_RS11300	Rhizobium_etli_GCF_000092045.1_ASM9204v1	100.00	0.0	0.0418368363382807	-	hypothetical protein
REMIM1_RS11140	Rhizobium_etli_GCF_000442435.1_ASM44243v1	100.00	0.0	0.0375299301192701	-	hypothetical protein
RL_RS13090	Rhizobium_leguminosarum_GCF_000009265.1_ASM926v1	87.26	4e-157	0.0404028422843545	-	hypothetical protein
NGR_c12480	Sinorhizobium_fredii_GCF_000018545.1_ASM1854v1	48.13	9e-73	0.0406905772249026	-	transmembrane anchored protein
SMc00997	Sinorhizobium_meliloti_GCF_000006965.1_ASM696v1	47.64	1e-70	0.0427941968955716	-	hypothetical protein SMc00997
/home/htaboada/sp27/red_etli/bin/footprint_discovery_enero_2018/etli_23_Feb_2018/Rhizobiales/Rhizobium_etli_GCF_000092045.1_ASM9204v1/RHE_RS07970/RHE_RS07970_Rhizobium_etli_GCF_000092045.1_ASM9204v1_Rhizobiales_taxfreq_ortho_bbh.tab
AAV28_RS01005	Bradyrhizobium_diazoefficiens_GCF_001642675.1_ASM164267v1	49.33	3e-52	0.0445977076075964	-	MULTISPECIES: polysaccharide export protein
BBTA_RS36815	Bradyrhizobium_sp._BTAi1_GCF_000015165.1_ASM1516v1	50.67	4e-50
MAFF_RS34275	Mesorhizobium_loti_GCF_000009625.1_ASM962v1	64.12	7e-87	0.0328451170259355	-	sugar ABC transporter substrate-binding protein
RHE_RS07970	Rhizobium_etli_GCF_000092045.1_ASM9204v1	100.00	1e-128	0.0418368363382807	-	MULTISPECIES: polysaccharide export protein
REMIM1_RS08130	Rhizobium_etli_GCF_000442435.1_ASM44243v1	100.00	2e-128	0.0380303291875271	-	MULTISPECIES: polysaccharide export protein
RL_RS08630	Rhizobium_leguminosarum_GCF_000009265.1_ASM926v1	96.86	1e-124	0.0470748712854405	-	MULTISPECIES: polysaccharide export protein
NGR_c10120	Sinorhizobium_fredii_GCF_000018545.1_ASM1854v1	69.63	2e-97	0.0364629847859517	-	polysaccharide export-related protein
SMc01794	Sinorhizobium_meliloti_GCF_000006965.1_ASM696v1	69.11	2e-97	0.0327560519447585	-	polysaccharide export system periplasmic transmembrane protein
AZC_RS22655	Azorhizobium_caulinodans_GCF_000010525.1_ASM1052v1	28.74	1e-09	0.0545143035148746	-	polysaccharide export protein
/home/htaboada/sp27/red_etli/bin/footprint_discovery_enero_2018/etli_23_Feb_2018/Rhizobiales/Rhizobium_etli_GCF_000092045.1_ASM9204v1/RHE_RS06955/RHE_RS06955_Rhizobium_etli_GCF_000092045.1_ASM9204v1_Rhizobiales_taxfreq_ortho_bbh.tab
RHE_RS06955	Rhizobium_etli_GCF_000092045.1_ASM9204v1	100.00	0.0	0.0418368363382807	-	DNA-binding response regulator
REMIM1_RS07130	Rhizobium_etli_GCF_000442435.1_ASM44243v1	99.61	0.0	0.0380303291875271	-	DNA-binding response regulator
RL_RS26595	Rhizobium_leguminosarum_GCF_000009265.1_ASM926v1	92.34	3e-168	0.0233521015038012	-	DNA-binding response regulator
NGR_b18490	Sinorhizobium_fredii_GCF_000018545.1_ASM1854v1	57.01	7e-94	0.0348776376213451	-	two-component response regulator protein (plasmid)
SM_b21080	Sinorhizobium_meliloti_GCF_000006965.1_ASM696v1	54.50	7e-87	0.027736979469352	-	response regulator protein (plasmid)
/home/htaboada/sp27/red_etli/bin/footprint_discovery_enero_2018/etli_23_Feb_2018/Rhizobiales/Rhizobium_etli_GCF_000092045.1_ASM9204v1/RHE_RS02170/RHE_RS02170_Rhizobium_etli_GCF_000092045.1_ASM9204v1_Rhizobiales_taxfreq_ortho_bbh.tab
AAV28_RS37535	Bradyrhizobium_diazoefficiens_GCF_001642675.1_ASM164267v1	64.21	3e-126	0.0240546690639398	-	MULTISPECIES: acetylglutamate kinase
BBTA_RS34290	Bradyrhizobium_sp._BTAi1_GCF_000015165.1_ASM1516v1	66.32	2e-131
MAFF_RS19850	Mesorhizobium_loti_GCF_000009625.1_ASM962v1	86.64	0.0	0.0553501046177802	-	acetylglutamate kinase
RHE_RS02170	Rhizobium_etli_GCF_000092045.1_ASM9204v1	100.00	0.0	0.0418368363382807	argB	MULTISPECIES: acetylglutamate kinase
REMIM1_RS02590	Rhizobium_etli_GCF_000442435.1_ASM44243v1	100.00	0.0	0.0440351180066103	-	MULTISPECIES: acetylglutamate kinase
RL_RS02315	Rhizobium_leguminosarum_GCF_000009265.1_ASM926v1	97.63	0.0	0.0370668277838114	-	acetylglutamate kinase
NGR_c00740	Sinorhizobium_fredii_GCF_000018545.1_ASM1854v1	94.92	0.0	0.0324996168744352	argB	acetylglutamate kinase
SMc01726	Sinorhizobium_meliloti_GCF_000006965.1_ASM696v1	93.56	0.0	0.0433225203140354	argB	acetylglutamate kinase
AZC_RS03585	Azorhizobium_caulinodans_GCF_000010525.1_ASM1052v1	68.49	4e-137	0.15640413270339	-	acetylglutamate kinase
/home/htaboada/sp27/red_etli/bin/footprint_discovery_enero_2018/etli_23_Feb_2018/Rhizobiales/Rhizobium_etli_GCF_000092045.1_ASM9204v1/RHE_RS01645/RHE_RS01645_Rhizobium_etli_GCF_000092045.1_ASM9204v1_Rhizobiales_taxfreq_ortho_bbh.tab
AAV28_RS20130	Bradyrhizobium_diazoefficiens_GCF_001642675.1_ASM164267v1	64.35	2e-114	0.0349407236768176	-	MULTISPECIES: cysteine synthase A
BBTA_RS20380	Bradyrhizobium_sp._BTAi1_GCF_000015165.1_ASM1516v1	65.40	2e-113	0.0397131055430331	cysK	cysteine synthase A
MAFF_RS18990	Mesorhizobium_loti_GCF_000009625.1_ASM962v1	81.96	1e-158	0.029803902486497	-	cysteine synthase A
RHE_RS01645	Rhizobium_etli_GCF_000092045.1_ASM9204v1	100.00	0.0	0.0418368363382807	cysK	cysteine synthase A
REMIM1_RS02060	Rhizobium_etli_GCF_000442435.1_ASM44243v1	100.00	0.0	0.0387809277899125	-	cysteine synthase A
RL_RS01775	Rhizobium_leguminosarum_GCF_000009265.1_ASM926v1	95.62	0.0	0.0252054428929918	-	cysteine synthase A
NGR_c36850	Sinorhizobium_fredii_GCF_000018545.1_ASM1854v1	83.39	4e-163	0.0338207395116074	cysK1	cysteine synthase A
SMc00421	Sinorhizobium_meliloti_GCF_000006965.1_ASM696v1	84.33	9e-165	0.0272086560508881	cysK1	O-acetylserine sulfhydrylase A
AZC_RS03625	Azorhizobium_caulinodans_GCF_000010525.1_ASM1052v1	69.21	6e-133	0.0350449094024194	-	cysteine synthase A
/home/htaboada/sp27/red_etli/bin/footprint_discovery_enero_2018/etli_23_Feb_2018/Rhizobiales/Rhizobium_etli_GCF_000092045.1_ASM9204v1/RHE_RS00415/RHE_RS00415_Rhizobium_etli_GCF_000092045.1_ASM9204v1_Rhizobiales_taxfreq_ortho_bbh.tab
AAV28_RS10685	Bradyrhizobium_diazoefficiens_GCF_001642675.1_ASM164267v1	49.25	3e-63	0.0170314080233734	-	MULTISPECIES: TetR
RHE_RS00415	Rhizobium_etli_GCF_000092045.1_ASM9204v1	100.00	2e-168	0.0418368363382807	-	TetR/AcrR family transcriptional regulator
REMIM1_RS00855	Rhizobium_etli_GCF_000442435.1_ASM44243v1	99.56	1e-167	0.0357785333803708	-	TetR/AcrR family transcriptional regulator
RL_RS00485	Rhizobium_leguminosarum_GCF_000009265.1_ASM926v1	95.11	4e-161	0.0270587842821823	-	TetR
NGR_b17980	Sinorhizobium_fredii_GCF_000018545.1_ASM1854v1	72.48	2e-120	0.0348776376213451	-	TetR family transcriptional regulator (plasmid)
SMc04134	Sinorhizobium_meliloti_GCF_000006965.1_ASM696v1	73.33	1e-120	0.038039286129397	-	transcriptional regulator
AZC_RS12135	Azorhizobium_caulinodans_GCF_000010525.1_ASM1052v1	44.30	4e-65
/home/htaboada/sp27/red_etli/bin/footprint_discovery_enero_2018/etli_23_Feb_2018/Rhizobiales/Rhizobium_etli_GCF_000092045.1_ASM9204v1/RHE_RS26165/RHE_RS26165_Rhizobium_etli_GCF_000092045.1_ASM9204v1_Rhizobiales_taxfreq_ortho_bbh.tab
AAV28_RS17580	Bradyrhizobium_diazoefficiens_GCF_001642675.1_ASM164267v1	49.33	1e-67	0.0314290931565344	-	MULTISPECIES: septum site-determining protein MinC
BBTA_RS04555	Bradyrhizobium_sp._BTAi1_GCF_000015165.1_ASM1516v1	50.68	3e-68	0.0416769404325237	-	septum formation inhibitor MinC
MAFF_RS08850	Mesorhizobium_loti_GCF_000009625.1_ASM962v1	37.78	1e-49	0.0296011548505344	-	septum site-determining protein MinC
RHE_RS26165	Rhizobium_etli_GCF_000092045.1_ASM9204v1	100.00	1e-160	0.0415522320094489	minC	septum formation inhibitor MinC
REMIM1_RS26415	Rhizobium_etli_GCF_000442435.1_ASM44243v1	99.59	2e-160	0.0337769371073431	minC	septum formation inhibitor MinC
RL_RS32515	Rhizobium_leguminosarum_GCF_000009265.1_ASM926v1	93.78	1e-147	0.0478162078411168	minC	septum formation inhibitor MinC
NGR_b19170	Sinorhizobium_fredii_GCF_000018545.1_ASM1854v1	71.03	3e-113	0.0367272093133861	minC	septum formation inhibitor (plasmid)
SM_b21524	Sinorhizobium_meliloti_GCF_000006965.1_ASM696v1	73.39	8e-118	0.0338126987816862	minC	septum formation inhibitor (plasmid)
/home/htaboada/sp27/red_etli/bin/footprint_discovery_enero_2018/etli_23_Feb_2018/Rhizobiales/Rhizobium_etli_GCF_000092045.1_ASM9204v1/RHE_RS24120/RHE_RS24120_Rhizobium_etli_GCF_000092045.1_ASM9204v1_Rhizobiales_taxfreq_ortho_bbh.tab
MAFF_RS29050	Mesorhizobium_loti_GCF_000009625.1_ASM962v1	74.24	0.0
RHE_RS24120	Rhizobium_etli_GCF_000092045.1_ASM9204v1	100.00	0.0	0.0415522320094489	-	ABC transporter ATP-binding protein
REMIM1_RS24335	Rhizobium_etli_GCF_000442435.1_ASM44243v1	99.84	0.0	0.0442853175407387	-	ABC transporter ATP-binding protein
RL_RS29925	Rhizobium_leguminosarum_GCF_000009265.1_ASM926v1	94.78	0.0	0.0448508616184118	-	ABC transporter ATP-binding protein
/home/htaboada/sp27/red_etli/bin/footprint_discovery_enero_2018/etli_23_Feb_2018/Rhizobiales/Rhizobium_etli_GCF_000092045.1_ASM9204v1/RHE_RS07695/RHE_RS07695_Rhizobium_etli_GCF_000092045.1_ASM9204v1_Rhizobiales_taxfreq_ortho_bbh.tab
AAV28_RS21950	Bradyrhizobium_diazoefficiens_GCF_001642675.1_ASM164267v1	73.44	0.0	0.0210697831216991	glyA	MULTISPECIES: serine hydroxymethyltransferase
BBTA_RS21765	Bradyrhizobium_sp._BTAi1_GCF_000015165.1_ASM1516v1	75.35	0.0	0.0246570380569381	glyA	serine hydroxymethyltransferase
MAFF_RS34130	Mesorhizobium_loti_GCF_000009625.1_ASM962v1	85.21	0.0	0.0277764261268714	glyA	serine hydroxymethyltransferase
RHE_RS07695	Rhizobium_etli_GCF_000092045.1_ASM9204v1	100.00	0.0	0.0415522320094489	glyA	serine hydroxymethyltransferase
REMIM1_RS07870	Rhizobium_etli_GCF_000442435.1_ASM44243v1	99.77	0.0	0.0360287329144993	glyA	serine hydroxymethyltransferase
RL_RS08395	Rhizobium_leguminosarum_GCF_000009265.1_ASM926v1	96.99	0.0	0.0274294525600205	glyA	serine hydroxymethyltransferase
NGR_c09570	Sinorhizobium_fredii_GCF_000018545.1_ASM1854v1	90.72	0.0	0.0338207395116074	glyA	serine hydroxymethyltransferase
SMc01770	Sinorhizobium_meliloti_GCF_000006965.1_ASM696v1	89.79	0.0	0.031171081689367	glyA	serine hydroxymethyltransferase
AZC_RS06490	Azorhizobium_caulinodans_GCF_000010525.1_ASM1052v1	74.35	0.0	0.0292040911686828	glyA	serine hydroxymethyltransferase
/home/htaboada/sp27/red_etli/bin/footprint_discovery_enero_2018/etli_23_Feb_2018/Rhizobiales/Rhizobium_etli_GCF_000092045.1_ASM9204v1/RHE_RS07070/RHE_RS07070_Rhizobium_etli_GCF_000092045.1_ASM9204v1_Rhizobiales_taxfreq_ortho_bbh.tab
AAV28_RS22125	Bradyrhizobium_diazoefficiens_GCF_001642675.1_ASM164267v1	65.60	2e-51	0.0372232835150017	-	MULTISPECIES: DNA-directed RNA polymerase subunit omega
BBTA_RS21965	Bradyrhizobium_sp._BTAi1_GCF_000015165.1_ASM1516v1	68.00	1e-52	0.0744075219240345	-	MULTISPECIES: DNA-directed RNA polymerase subunit omega
MAFF_RS31580	Mesorhizobium_loti_GCF_000009625.1_ASM962v1	79.10	9e-69	0.0458209657275396	-	DNA-directed RNA polymerase subunit omega
RHE_RS07070	Rhizobium_etli_GCF_000092045.1_ASM9204v1	100.00	8e-87	0.0415522320094489	-	MULTISPECIES: DNA-directed RNA polymerase subunit omega
REMIM1_RS07245	Rhizobium_etli_GCF_000442435.1_ASM44243v1	100.00	8e-87	0.0392813268581694	-	MULTISPECIES: DNA-directed RNA polymerase subunit omega
RL_RS07820	Rhizobium_leguminosarum_GCF_000009265.1_ASM926v1	97.76	2e-84	0.0300241305048873	-	DNA-directed RNA polymerase subunit omega
SMc02408	Sinorhizobium_meliloti_GCF_000006965.1_ASM696v1	83.70	2e-71	0.0425300351863397	rpoZ	DNA-directed RNA polymerase subunit omega
AZC_RS06450	Azorhizobium_caulinodans_GCF_000010525.1_ASM1052v1	69.17	6e-61	0.142775556824672	-	DNA-directed RNA polymerase subunit omega
/home/htaboada/sp27/red_etli/bin/footprint_discovery_enero_2018/etli_23_Feb_2018/Rhizobiales/Rhizobium_etli_GCF_000092045.1_ASM9204v1/RHE_RS06285/RHE_RS06285_Rhizobium_etli_GCF_000092045.1_ASM9204v1_Rhizobiales_taxfreq_ortho_bbh.tab
AAV28_RS40370	Bradyrhizobium_diazoefficiens_GCF_001642675.1_ASM164267v1	58.38	0.0
BBTA_RS02590	Bradyrhizobium_sp._BTAi1_GCF_000015165.1_ASM1516v1	59.71	0.0
MAFF_RS31160	Mesorhizobium_loti_GCF_000009625.1_ASM962v1	67.16	0.0	0.0342643504776734	-	S9 family peptidase
RHE_RS06285	Rhizobium_etli_GCF_000092045.1_ASM9204v1	100.00	0.0	0.0415522320094489	-	S9 family peptidase
REMIM1_RS06495	Rhizobium_etli_GCF_000442435.1_ASM44243v1	99.72	0.0	0.038530728255784	-	S9 family peptidase
RL_RS07090	Rhizobium_leguminosarum_GCF_000009265.1_ASM926v1	94.87	0.0	0.0289121256713729	-	S9 family peptidase
NGR_c07420	Sinorhizobium_fredii_GCF_000018545.1_ASM1854v1	86.59	0.0	0.0240444319965334	ptrB	peptidase S9A family
SMc00114	Sinorhizobium_meliloti_GCF_000006965.1_ASM696v1	85.04	0.0	0.0280011411785839	ptrB	protease II oligopeptidase B hydrolase serine protease
AZC_RS05555	Azorhizobium_caulinodans_GCF_000010525.1_ASM1052v1	58.37	0.0
/home/htaboada/sp27/red_etli/bin/footprint_discovery_enero_2018/etli_23_Feb_2018/Rhizobiales/Rhizobium_etli_GCF_000092045.1_ASM9204v1/RHE_RS00920/RHE_RS00920_Rhizobium_etli_GCF_000092045.1_ASM9204v1_Rhizobiales_taxfreq_ortho_bbh.tab
AAV28_RS08040	Bradyrhizobium_diazoefficiens_GCF_001642675.1_ASM164267v1	70.97	0.0	0.0224744353298123	-	MULTISPECIES: nicotinate phosphoribosyltransferase
BBTA_RS01495	Bradyrhizobium_sp._BTAi1_GCF_000015165.1_ASM1516v1	71.43	0.0	0.0259662613165986	pncB	nicotinate phosphoribosyltransferase
MAFF_RS20105	Mesorhizobium_loti_GCF_000009625.1_ASM962v1	78.57	0.0	0.0198692683243313	-	nicotinate phosphoribosyltransferase
RHE_RS00920	Rhizobium_etli_GCF_000092045.1_ASM9204v1	100.00	0.0	0.0415522320094489	pncB	nicotinate phosphoribosyltransferase
REMIM1_RS01360	Rhizobium_etli_GCF_000442435.1_ASM44243v1	99.08	0.0	0.042283721267711	-	nicotinate phosphoribosyltransferase
RL_RS01005	Rhizobium_leguminosarum_GCF_000009265.1_ASM926v1	97.70	0.0	0.0281707891156967	-	MULTISPECIES: nicotinate phosphoribosyltransferase
NGR_c02120	Sinorhizobium_fredii_GCF_000018545.1_ASM1854v1	84.10	0.0	0.0200810640850169	pncB	nicotinate phosphoribosyltransferase
SMc02276	Sinorhizobium_meliloti_GCF_000006965.1_ASM696v1	84.79	0.0	0.0306427582709031	pncB	nicotinate phosphoribosyltransferase
AZC_RS17380	Azorhizobium_caulinodans_GCF_000010525.1_ASM1052v1	59.86	0.0
/home/htaboada/sp27/red_etli/bin/footprint_discovery_enero_2018/etli_23_Feb_2018/Rhizobiales/Rhizobium_etli_GCF_000092045.1_ASM9204v1/RHE_RS26705/RHE_RS26705_Rhizobium_etli_GCF_000092045.1_ASM9204v1_Rhizobiales_taxfreq_ortho_bbh.tab
RHE_RS26705	Rhizobium_etli_GCF_000092045.1_ASM9204v1	100.00	3e-124	0.041267627680617	-	ferritin-like domain-containing protein
REMIM1_RS29720	Rhizobium_etli_GCF_000442435.1_ASM44243v1	99.41	1e-123	0.0340271366414716	-	ferritin-like domain-containing protein
SM_b20091	Sinorhizobium_meliloti_GCF_000006965.1_ASM696v1	37.20	1e-35	0.0282653028878158	-	hypothetical protein SM_b20091 (plasmid)
AZC_RS08395	Azorhizobium_caulinodans_GCF_000010525.1_ASM1052v1	59.17	3e-68	0.0343959295986709	-	ferritin-like domain-containing protein
/home/htaboada/sp27/red_etli/bin/footprint_discovery_enero_2018/etli_23_Feb_2018/Rhizobiales/Rhizobium_etli_GCF_000092045.1_ASM9204v1/RHE_RS26675/RHE_RS26675_Rhizobium_etli_GCF_000092045.1_ASM9204v1_Rhizobiales_taxfreq_ortho_bbh.tab
AAV28_RS27780	Bradyrhizobium_diazoefficiens_GCF_001642675.1_ASM164267v1	63.64	2e-52	0.0219476907517699	-	MULTISPECIES: ferritin-like domain-containing protein
BBTA_RS23040	Bradyrhizobium_sp._BTAi1_GCF_000015165.1_ASM1516v1	64.78	2e-57	0.0270572806996489	-	ferritin-like domain-containing protein
MAFF_RS00690	Mesorhizobium_loti_GCF_000009625.1_ASM962v1	60.76	1e-59
RHE_RS26675	Rhizobium_etli_GCF_000092045.1_ASM9204v1	100.00	6e-109	0.041267627680617	-	ferritin-like domain-containing protein
REMIM1_RS29690	Rhizobium_etli_GCF_000442435.1_ASM44243v1	100.00	6e-109	0.0417833221994541	-	ferritin-like domain-containing protein
AZC_RS11820	Azorhizobium_caulinodans_GCF_000010525.1_ASM1052v1	67.70	1e-70	0.040885727636156	-	ferritin-like domain-containing protein
/home/htaboada/sp27/red_etli/bin/footprint_discovery_enero_2018/etli_23_Feb_2018/Rhizobiales/Rhizobium_etli_GCF_000092045.1_ASM9204v1/RHE_RS20540/RHE_RS20540_Rhizobium_etli_GCF_000092045.1_ASM9204v1_Rhizobiales_taxfreq_ortho_bbh.tab
AAV28_RS39625	Bradyrhizobium_diazoefficiens_GCF_001642675.1_ASM164267v1	53.50	3e-69	0.0224744353298123	-	polyhydroxyalkanoate synthesis repressor PhaR
BBTA_RS35635	Bradyrhizobium_sp._BTAi1_GCF_000015165.1_ASM1516v1	55.61	2e-70
MAFF_RS16135	Mesorhizobium_loti_GCF_000009625.1_ASM962v1	56.93	6e-76	0.0310203883022724	-	polyhydroxyalkanoate synthesis repressor PhaR
RHE_RS20540	Rhizobium_etli_GCF_000092045.1_ASM9204v1	100.00	2e-143	0.041267627680617	phaR	polyhydroxyalkanoate synthesis repressor PhaR
REMIM1_RS20310	Rhizobium_etli_GCF_000442435.1_ASM44243v1	100.00	2e-143	0.0377801296533986	-	polyhydroxyalkanoate synthesis repressor PhaR
RL_RS23805	Rhizobium_leguminosarum_GCF_000009265.1_ASM926v1	95.81	3e-136	0.0315068036162397	-	MULTISPECIES: polyhydroxyalkanoate synthesis repressor PhaR
NGR_c32730	Sinorhizobium_fredii_GCF_000018545.1_ASM1854v1	87.43	3e-128	0.0282720244354843	-	polyhydroxyalkanoate synthesis repressor PhaR
SMc03880	Sinorhizobium_meliloti_GCF_000006965.1_ASM696v1	86.91	3e-127	0.024302877249337	-	hypothetical protein SMc03880
AZC_RS01560	Azorhizobium_caulinodans_GCF_000010525.1_ASM1052v1	55.00	2e-70	0.0519183842998806	-	polyhydroxyalkanoate synthesis repressor PhaR
/home/htaboada/sp27/red_etli/bin/footprint_discovery_enero_2018/etli_23_Feb_2018/Rhizobiales/Rhizobium_etli_GCF_000092045.1_ASM9204v1/RHE_RS18170/RHE_RS18170_Rhizobium_etli_GCF_000092045.1_ASM9204v1_Rhizobiales_taxfreq_ortho_bbh.tab
AAV28_RS09775	Bradyrhizobium_diazoefficiens_GCF_001642675.1_ASM164267v1	26.40	6e-32	0.0293221148443645	-	multifunctional 2\',3\'-cyclic-nucleotide 2\'-phosphodiesterase
BBTA_RS11575	Bradyrhizobium_sp._BTAi1_GCF_000015165.1_ASM1516v1	25.00	7e-32	0.0370946590237122	-	multifunctional 2\',3\'-cyclic-nucleotide 2\'-phosphodiesterase
MAFF_RS12875	Mesorhizobium_loti_GCF_000009625.1_ASM962v1	66.36	0.0	0.0259516974032083	-	LysM peptidoglycan-binding domain-containing protein
RHE_RS18170	Rhizobium_etli_GCF_000092045.1_ASM9204v1	100.00	0.0	0.041267627680617	-	LysM peptidoglycan-binding domain-containing protein
REMIM1_RS17935	Rhizobium_etli_GCF_000442435.1_ASM44243v1	99.44	0.0	0.0390311273240409	-	LysM peptidoglycan-binding domain-containing protein
RL_RS21030	Rhizobium_leguminosarum_GCF_000009265.1_ASM926v1	93.81	0.0	0.0240934380594774	-	LysM peptidoglycan-binding domain-containing protein
NGR_c28490	Sinorhizobium_fredii_GCF_000018545.1_ASM1854v1	78.53	0.0	0.0237802074690989	-	5\'-nucleotidase
SMc04018	Sinorhizobium_meliloti_GCF_000006965.1_ASM696v1	78.09	0.0	0.0322277285262947	-	5\'-nucleotidase
/home/htaboada/sp27/red_etli/bin/footprint_discovery_enero_2018/etli_23_Feb_2018/Rhizobiales/Rhizobium_etli_GCF_000092045.1_ASM9204v1/RHE_RS17660/RHE_RS17660_Rhizobium_etli_GCF_000092045.1_ASM9204v1_Rhizobiales_taxfreq_ortho_bbh.tab
AAV28_RS34080	Bradyrhizobium_diazoefficiens_GCF_001642675.1_ASM164267v1	29.18	2e-22	0.0345895606247893	-	MULTISPECIES: porin family protein
BBTA_RS08460	Bradyrhizobium_sp._BTAi1_GCF_000015165.1_ASM1516v1	29.48	7e-23	0.0434225714454043	-	porin family protein
MAFF_RS16270	Mesorhizobium_loti_GCF_000009625.1_ASM962v1	45.38	3e-50	0.0393330413767375	-	porin family protein
RHE_RS17660	Rhizobium_etli_GCF_000092045.1_ASM9204v1	100.00	0.0	0.041267627680617	-	porin family protein
REMIM1_RS17425	Rhizobium_etli_GCF_000442435.1_ASM44243v1	99.28	0.0	0.0380303291875271	-	porin family protein
RL_RS20440	Rhizobium_leguminosarum_GCF_000009265.1_ASM926v1	93.91	1e-177	0.0441095250627356	-	porin family protein
NGR_c27730	Sinorhizobium_fredii_GCF_000018545.1_ASM1854v1	39.01	8e-35	0.027479350853181	-	hypothetical protein NGR_c27730
SMc00638	Sinorhizobium_meliloti_GCF_000006965.1_ASM696v1	61.03	3e-102	0.0348693456186139	-	HEAT resistant agglutinin 1 protein
AZC_RS04985	Azorhizobium_caulinodans_GCF_000010525.1_ASM1052v1	26.44	3e-06	0.047375525673641	-	porin family protein
/home/htaboada/sp27/red_etli/bin/footprint_discovery_enero_2018/etli_23_Feb_2018/Rhizobiales/Rhizobium_etli_GCF_000092045.1_ASM9204v1/RHE_RS16230/RHE_RS16230_Rhizobium_etli_GCF_000092045.1_ASM9204v1_Rhizobiales_taxfreq_ortho_bbh.tab
AAV28_RS07735	Bradyrhizobium_diazoefficiens_GCF_001642675.1_ASM164267v1	25.42	7e-20	0.022123272277784	-	MULTISPECIES: ROK family protein
MAFF_RS15630	Mesorhizobium_loti_GCF_000009625.1_ASM962v1	34.50	5e-46	0.0364945744732616	-	ROK family protein
RHE_RS16230	Rhizobium_etli_GCF_000092045.1_ASM9204v1	100.00	0.0	0.041267627680617	-	ROK family transcriptional regulator
REMIM1_RS15985	Rhizobium_etli_GCF_000442435.1_ASM44243v1	100.00	0.0	0.03102474223193	-	ROK family transcriptional regulator
RL_RS18665	Rhizobium_leguminosarum_GCF_000009265.1_ASM926v1	92.10	0.0	0.0352134863946209	-	ROK family transcriptional regulator
NGR_c24210	Sinorhizobium_fredii_GCF_000018545.1_ASM1854v1	64.52	1e-161
SM_b20901	Sinorhizobium_meliloti_GCF_000006965.1_ASM696v1	64.93	5e-165	0.0385676095478608	-	transcriptional regulator (plasmid)
/home/htaboada/sp27/red_etli/bin/footprint_discovery_enero_2018/etli_23_Feb_2018/Rhizobiales/Rhizobium_etli_GCF_000092045.1_ASM9204v1/RHE_RS10645/RHE_RS10645_Rhizobium_etli_GCF_000092045.1_ASM9204v1_Rhizobiales_taxfreq_ortho_bbh.tab
AAV28_RS38995	Bradyrhizobium_diazoefficiens_GCF_001642675.1_ASM164267v1	58.27	5e-104	0.0286197887403079	-	MULTISPECIES: ferredoxin--NADP reductase
BBTA_RS35055	Bradyrhizobium_sp._BTAi1_GCF_000015165.1_ASM1516v1	57.09	9e-90
MAFF_RS19690	Mesorhizobium_loti_GCF_000009625.1_ASM962v1	65.76	4e-122	0.0405495271925129	-	ferredoxin--NADP reductase
RHE_RS10645	Rhizobium_etli_GCF_000092045.1_ASM9204v1	100.00	0.0	0.041267627680617	-	ferredoxin--NADP reductase
REMIM1_RS10490	Rhizobium_etli_GCF_000442435.1_ASM44243v1	100.00	0.0	0.0377801296533986	-	ferredoxin--NADP reductase
RL_RS12225	Rhizobium_leguminosarum_GCF_000009265.1_ASM926v1	97.41	0.0	0.035584154672459	-	ferredoxin--NADP reductase
NGR_c13090	Sinorhizobium_fredii_GCF_000018545.1_ASM1854v1	84.81	3e-174	0.0398979036425993	-	NADPH:ferredoxin reductase
SMc02122	Sinorhizobium_meliloti_GCF_000006965.1_ASM696v1	84.44	9e-173	0.0338126987816862	fpr	ferredoxin--NADP reductase
AZC_RS09480	Azorhizobium_caulinodans_GCF_000010525.1_ASM1052v1	60.24	3e-109	0.146669435647163	-	ferredoxin--NADP reductase
/home/htaboada/sp27/red_etli/bin/footprint_discovery_enero_2018/etli_23_Feb_2018/Rhizobiales/Rhizobium_etli_GCF_000092045.1_ASM9204v1/RHE_RS09865/RHE_RS09865_Rhizobium_etli_GCF_000092045.1_ASM9204v1_Rhizobiales_taxfreq_ortho_bbh.tab
AAV28_RS20655	Bradyrhizobium_diazoefficiens_GCF_001642675.1_ASM164267v1	36.36	5e-17	0.0326581638386336	-	MULTISPECIES: septum formation initiator family protein
BBTA_RS20860	Bradyrhizobium_sp._BTAi1_GCF_000015165.1_ASM1516v1	32.04	1e-14	0.0416769404325237	-	septum formation initiator family protein
MAFF_RS02555	Mesorhizobium_loti_GCF_000009625.1_ASM962v1	50.50	3e-36	0.0362918268372991	-	MULTISPECIES: cell division protein
RHE_RS09865	Rhizobium_etli_GCF_000092045.1_ASM9204v1	100.00	2e-78	0.041267627680617	-	MULTISPECIES: septum formation initiator family protein
REMIM1_RS10030	Rhizobium_etli_GCF_000442435.1_ASM44243v1	100.00	2e-78	0.0332765380390862	-	MULTISPECIES: septum formation initiator family protein
RL_RS11600	Rhizobium_leguminosarum_GCF_000009265.1_ASM926v1	96.23	4e-76	0.0329894767275922	-	septum formation initiator family protein
NGR_c12810	Sinorhizobium_fredii_GCF_000018545.1_ASM1854v1	65.09	1e-48	0.0396336791151649	-	hypothetical protein NGR_c12810
SMc01029	Sinorhizobium_meliloti_GCF_000006965.1_ASM696v1	60.22	2e-36	0.0332843753632224	-	hypothetical protein SMc01029
AZC_RS09020	Azorhizobium_caulinodans_GCF_000010525.1_ASM1052v1	43.59	7e-18	0.0512694044961321	-	septum formation initiator family protein
/home/htaboada/sp27/red_etli/bin/footprint_discovery_enero_2018/etli_23_Feb_2018/Rhizobiales/Rhizobium_etli_GCF_000092045.1_ASM9204v1/RHE_RS09565/RHE_RS09565_Rhizobium_etli_GCF_000092045.1_ASM9204v1_Rhizobiales_taxfreq_ortho_bbh.tab
AAV28_RS18000	Bradyrhizobium_diazoefficiens_GCF_001642675.1_ASM164267v1	41.85	9e-55	0.0338872345207327	-	MULTISPECIES: DsbA family protein
BBTA_RS19695	Bradyrhizobium_sp._BTAi1_GCF_000015165.1_ASM1516v1	44.89	3e-62	0.0462592218413352	-	DsbA family protein
MAFF_RS01875	Mesorhizobium_loti_GCF_000009625.1_ASM962v1	48.79	6e-66	0.0202747635962565	-	DSBA oxidoreductase
RHE_RS09565	Rhizobium_etli_GCF_000092045.1_ASM9204v1	100.00	1e-174	0.041267627680617	-	DsbA family protein
REMIM1_RS09730	Rhizobium_etli_GCF_000442435.1_ASM44243v1	98.81	1e-173	0.0237689557422044	-	DsbA family protein
RL_RS10850	Rhizobium_leguminosarum_GCF_000009265.1_ASM926v1	91.27	8e-161	0.0344721498389446	-	DsbA family protein
NGR_c11100	Sinorhizobium_fredii_GCF_000018545.1_ASM1854v1	64.16	3e-103	0.0216664112496235	-	outer membrane protein
SMc01342	Sinorhizobium_meliloti_GCF_000006965.1_ASM696v1	62.83	4e-102	0.0192838047739304	-	hypothetical protein SMc01342
AZC_RS15850	Azorhizobium_caulinodans_GCF_000010525.1_ASM1052v1	42.53	3e-53
/home/htaboada/sp27/red_etli/bin/footprint_discovery_enero_2018/etli_23_Feb_2018/Rhizobiales/Rhizobium_etli_GCF_000092045.1_ASM9204v1/RHE_RS23910/RHE_RS23910_Rhizobium_etli_GCF_000092045.1_ASM9204v1_Rhizobiales_taxfreq_ortho_bbh.tab
RHE_RS23910	Rhizobium_etli_GCF_000092045.1_ASM9204v1	100.00	9e-164	0.0409830233517852	-	autoaggregation protein
REMIM1_RS22865	Rhizobium_etli_GCF_000442435.1_ASM44243v1	98.74	4e-160	0.0407825240629402	-	VCBS repeat-containing protein
/home/htaboada/sp27/red_etli/bin/footprint_discovery_enero_2018/etli_23_Feb_2018/Rhizobiales/Rhizobium_etli_GCF_000092045.1_ASM9204v1/RHE_RS22765/RHE_RS22765_Rhizobium_etli_GCF_000092045.1_ASM9204v1_Rhizobiales_taxfreq_ortho_bbh.tab
MAFF_RS26295	Mesorhizobium_loti_GCF_000009625.1_ASM962v1	73.00	0.0	0.0369000697451868	-	carbohydrate ABC transporter substrate-binding protein
RHE_RS22765	Rhizobium_etli_GCF_000092045.1_ASM9204v1	100.00	0.0	0.0409830233517852	-	ABC transporter substrate-binding protein
REMIM1_RS21740	Rhizobium_etli_GCF_000442435.1_ASM44243v1	100.00	0.0	0.0380303291875271	-	ABC transporter substrate-binding protein
RL_RS27265	Rhizobium_leguminosarum_GCF_000009265.1_ASM926v1	94.34	0.0	0.0285414573935348	-	ABC transporter substrate-binding protein
NGR_b02700	Sinorhizobium_fredii_GCF_000018545.1_ASM1854v1	35.36	4e-49	0.0327638414018697	lacE	Lactose-binding protein (plasmid)
SM_b21652	Sinorhizobium_meliloti_GCF_000006965.1_ASM696v1	32.60	1e-43	0.0316994051078308	lacE	lactose ABC transporter substrate-binding protein (plasmid)
/home/htaboada/sp27/red_etli/bin/footprint_discovery_enero_2018/etli_23_Feb_2018/Rhizobiales/Rhizobium_etli_GCF_000092045.1_ASM9204v1/RHE_RS12375/RHE_RS12375_Rhizobium_etli_GCF_000092045.1_ASM9204v1_Rhizobiales_taxfreq_ortho_bbh.tab
RHE_RS12375	Rhizobium_etli_GCF_000092045.1_ASM9204v1	100.00	3e-173	0.0409830233517852	-	S-adenosylmethionine-dependent methyltransferase
REMIM1_RS12210	Rhizobium_etli_GCF_000442435.1_ASM44243v1	100.00	3e-173	0.0397817259264263	-	S-adenosylmethionine-dependent methyltransferase
RL_RS14235	Rhizobium_leguminosarum_GCF_000009265.1_ASM926v1	93.75	2e-154	0.0315068036162397	-	S-adenosylmethionine-dependent methyltransferase
NGR_c17230	Sinorhizobium_fredii_GCF_000018545.1_ASM1854v1	76.95	5e-132	0.0335565149841729	-	methyltransferase protein
SMc00134	Sinorhizobium_meliloti_GCF_000006965.1_ASM696v1	75.66	7e-127	0.0229820687031773	-	hypothetical protein SMc00134
/home/htaboada/sp27/red_etli/bin/footprint_discovery_enero_2018/etli_23_Feb_2018/Rhizobiales/Rhizobium_etli_GCF_000092045.1_ASM9204v1/RHE_RS06165/RHE_RS06165_Rhizobium_etli_GCF_000092045.1_ASM9204v1_Rhizobiales_taxfreq_ortho_bbh.tab
AAV28_RS35915	Bradyrhizobium_diazoefficiens_GCF_001642675.1_ASM164267v1	69.19	8e-90	0.045300033711653	-	MULTISPECIES: superoxide dismutase
BBTA_RS06305	Bradyrhizobium_sp._BTAi1_GCF_000015165.1_ASM1516v1	70.35	1e-91	0.0495322799904863	-	superoxide dismutase
MAFF_RS31135	Mesorhizobium_loti_GCF_000009625.1_ASM962v1	87.88	6e-117	0.0498759184467909	-	superoxide dismutase
RHE_RS06165	Rhizobium_etli_GCF_000092045.1_ASM9204v1	100.00	3e-132	0.0409830233517852	-	superoxide dismutase
REMIM1_RS06405	Rhizobium_etli_GCF_000442435.1_ASM44243v1	100.00	3e-132	0.0410327235970687	-	superoxide dismutase
RL_RS06985	Rhizobium_leguminosarum_GCF_000009265.1_ASM926v1	97.00	4e-129	0.0370668277838114	-	MULTISPECIES: superoxide dismutase
NGR_c07300	Sinorhizobium_fredii_GCF_000018545.1_ASM1854v1	82.50	1e-111	0.0277435753806154	sodB	superoxide dismutase contains Mn
SMc00043	Sinorhizobium_meliloti_GCF_000006965.1_ASM696v1	84.50	8e-114	0.0293219497247435	sodB	superoxide dismutase Fe protein
AZC_RS15755	Azorhizobium_caulinodans_GCF_000010525.1_ASM1052v1	65.33	2e-86	0.0590571621411142	-	superoxide dismutase
/home/htaboada/sp27/red_etli/bin/footprint_discovery_enero_2018/etli_23_Feb_2018/Rhizobiales/Rhizobium_etli_GCF_000092045.1_ASM9204v1/RHE_RS04475/RHE_RS04475_Rhizobium_etli_GCF_000092045.1_ASM9204v1_Rhizobiales_taxfreq_ortho_bbh.tab
MAFF_RS01480	Mesorhizobium_loti_GCF_000009625.1_ASM962v1	58.82	3e-60	0.0220994923199196	-	DUF523 domain-containing protein
RHE_RS04475	Rhizobium_etli_GCF_000092045.1_ASM9204v1	100.00	5e-117	0.0409830233517852	-	DUF523 domain-containing protein
REMIM1_RS04900	Rhizobium_etli_GCF_000442435.1_ASM44243v1	100.00	5e-117	0.0400319254605548	-	DUF523 domain-containing protein
RL_RS04950	Rhizobium_leguminosarum_GCF_000009265.1_ASM926v1	86.96	7e-98	0.0255761111708299	-	DUF523 domain-containing protein
NGR_c04720	Sinorhizobium_fredii_GCF_000018545.1_ASM1854v1	68.32	4e-79	0.0340849640390418	-	hypothetical protein NGR_c04720
SMc00850	Sinorhizobium_meliloti_GCF_000006965.1_ASM696v1	73.12	9e-85	0.048341592789442	-	hypothetical protein SMc00850
/home/htaboada/sp27/red_etli/bin/footprint_discovery_enero_2018/etli_23_Feb_2018/Rhizobiales/Rhizobium_etli_GCF_000092045.1_ASM9204v1/RHE_RS04320/RHE_RS04320_Rhizobium_etli_GCF_000092045.1_ASM9204v1_Rhizobiales_taxfreq_ortho_bbh.tab
AAV28_RS15170	Bradyrhizobium_diazoefficiens_GCF_001642675.1_ASM164267v1	71.37	1e-107
BBTA_RS16190	Bradyrhizobium_sp._BTAi1_GCF_000015165.1_ASM1516v1	70.82	1e-108	0.0261844651932086	-	iron-sulfur cluster carrier protein ApbC
MAFF_RS22120	Mesorhizobium_loti_GCF_000009625.1_ASM962v1	80.24	4e-133	0.0405495271925129	-	Fe-S-binding ATPase
RHE_RS04320	Rhizobium_etli_GCF_000092045.1_ASM9204v1	100.00	0.0	0.0409830233517852	-	Fe-S-binding ATPase
REMIM1_RS04745	Rhizobium_etli_GCF_000442435.1_ASM44243v1	99.49	0.0	0.0342773361756	-	Fe-S-binding ATPase
RL_RS04805	Rhizobium_leguminosarum_GCF_000009265.1_ASM926v1	97.96	1e-164	0.0211280918367725	-	Fe-S-binding ATPase
NGR_c04410	Sinorhizobium_fredii_GCF_000018545.1_ASM1854v1	85.48	3e-144	0.0258940036885744	-	ATP-binding Mrp family protein
SMc00876	Sinorhizobium_meliloti_GCF_000006965.1_ASM696v1	84.68	2e-142	0.0203404516108581	-	ATP-binding MRP protein
AZC_RS17310	Azorhizobium_caulinodans_GCF_000010525.1_ASM1052v1	67.21	2e-109	0.0499714448886351	-	iron-sulfur cluster carrier protein ApbC
/home/htaboada/sp27/red_etli/bin/footprint_discovery_enero_2018/etli_23_Feb_2018/Rhizobiales/Rhizobium_etli_GCF_000092045.1_ASM9204v1/RHE_RS03390/RHE_RS03390_Rhizobium_etli_GCF_000092045.1_ASM9204v1_Rhizobiales_taxfreq_ortho_bbh.tab
RHE_RS03390	Rhizobium_etli_GCF_000092045.1_ASM9204v1	100.00	0.0	0.0409830233517852	-	flagellin
REMIM1_RS03790	Rhizobium_etli_GCF_000442435.1_ASM44243v1	100.00	0.0	0.0440351180066103	-	flagellin
RL_RS03775	Rhizobium_leguminosarum_GCF_000009265.1_ASM926v1	94.37	0.0	0.0229814332259631	-	flagellin
/home/htaboada/sp27/red_etli/bin/footprint_discovery_enero_2018/etli_23_Feb_2018/Rhizobiales/Rhizobium_etli_GCF_000092045.1_ASM9204v1/RHE_RS01305/RHE_RS01305_Rhizobium_etli_GCF_000092045.1_ASM9204v1_Rhizobiales_taxfreq_ortho_bbh.tab
MAFF_RS01535	Mesorhizobium_loti_GCF_000009625.1_ASM962v1	54.60	4e-64	0.0261544450391708	-	transglutaminase
RHE_RS01305	Rhizobium_etli_GCF_000092045.1_ASM9204v1	100.00	6e-134	0.0409830233517852	-	transglutaminase
REMIM1_RS01725	Rhizobium_etli_GCF_000442435.1_ASM44243v1	99.50	2e-133	0.0375299301192701	-	MULTISPECIES: transglutaminase
RL_RS01385	Rhizobium_leguminosarum_GCF_000009265.1_ASM926v1	90.95	3e-121	0.0381788326173258	-	transglutaminase
NGR_c36180	Sinorhizobium_fredii_GCF_000018545.1_ASM1854v1	60.59	4e-76	0.0348776376213451	-	transglutaminase family protein cysteine peptidase, BTLCP
SMc00360	Sinorhizobium_meliloti_GCF_000006965.1_ASM696v1	59.41	3e-72	0.034605183909382	-	hypothetical protein SMc00360
/home/htaboada/sp27/red_etli/bin/footprint_discovery_enero_2018/etli_23_Feb_2018/Rhizobiales/Rhizobium_etli_GCF_000092045.1_ASM9204v1/RHE_RS31740/RHE_RS31740_Rhizobium_etli_GCF_000092045.1_ASM9204v1_Rhizobiales_taxfreq_ortho_bbh.tab
RHE_RS31740	Rhizobium_etli_GCF_000092045.1_ASM9204v1	100.00	5e-52	0.0406984190229533	-	BA14K family protein
REMIM1_RS35540	Rhizobium_etli_GCF_000442435.1_ASM44243v1	98.29	1e-50	0.0390311273240409	-	BA14K family protein
/home/htaboada/sp27/red_etli/bin/footprint_discovery_enero_2018/etli_23_Feb_2018/Rhizobiales/Rhizobium_etli_GCF_000092045.1_ASM9204v1/RHE_RS26415/RHE_RS26415_Rhizobium_etli_GCF_000092045.1_ASM9204v1_Rhizobiales_taxfreq_ortho_bbh.tab
/home/htaboada/sp27/red_etli/bin/footprint_discovery_enero_2018/etli_23_Feb_2018/Rhizobiales/Rhizobium_etli_GCF_000092045.1_ASM9204v1/RHE_RS22200/RHE_RS22200_Rhizobium_etli_GCF_000092045.1_ASM9204v1_Rhizobiales_taxfreq_ortho_bbh.tab
BBTA_RS11145	Bradyrhizobium_sp._BTAi1_GCF_000015165.1_ASM1516v1	27.54	5e-07	0.0340398047511712	-	DUF4142 domain-containing protein
MAFF_RS10750	Mesorhizobium_loti_GCF_000009625.1_ASM962v1	35.80	1e-23	0.0271681832189837	-	DUF4142 domain-containing protein
RHE_RS22200	Rhizobium_etli_GCF_000092045.1_ASM9204v1	100.00	1e-128	0.0406984190229533	-	DUF4142 domain-containing protein
REMIM1_RS21185	Rhizobium_etli_GCF_000442435.1_ASM44243v1	100.00	1e-128	0.0372797305851417	-	DUF4142 domain-containing protein
AZC_RS11810	Azorhizobium_caulinodans_GCF_000010525.1_ASM1052v1	54.75	3e-65	0.04348164685115	-	DUF4142 domain-containing protein
/home/htaboada/sp27/red_etli/bin/footprint_discovery_enero_2018/etli_23_Feb_2018/Rhizobiales/Rhizobium_etli_GCF_000092045.1_ASM9204v1/RHE_RS22160/RHE_RS22160_Rhizobium_etli_GCF_000092045.1_ASM9204v1_Rhizobiales_taxfreq_ortho_bbh.tab
RHE_RS22160	Rhizobium_etli_GCF_000092045.1_ASM9204v1	100.00	0.0	0.0406984190229533	-	ABC transporter substrate-binding protein
REMIM1_RS21145	Rhizobium_etli_GCF_000442435.1_ASM44243v1	100.00	0.0	0.0380303291875271	-	ABC transporter substrate-binding protein
RL_RS26380	Rhizobium_leguminosarum_GCF_000009265.1_ASM926v1	95.20	0.0	0.0278001208378586	-	ABC transporter substrate-binding protein
NGR_b17200	Sinorhizobium_fredii_GCF_000018545.1_ASM1854v1	82.28	0.0	0.0404263526974682	-	periplasmic oligopeptide-binding protein (plasmid)
/home/htaboada/sp27/red_etli/bin/footprint_discovery_enero_2018/etli_23_Feb_2018/Rhizobiales/Rhizobium_etli_GCF_000092045.1_ASM9204v1/RHE_RS19825/RHE_RS19825_Rhizobium_etli_GCF_000092045.1_ASM9204v1_Rhizobiales_taxfreq_ortho_bbh.tab
AAV28_RS40720	Bradyrhizobium_diazoefficiens_GCF_001642675.1_ASM164267v1	54.08	0.0	0.0180848971794584	-	MULTISPECIES: primosomal protein N\'
BBTA_RS01925	Bradyrhizobium_sp._BTAi1_GCF_000015165.1_ASM1516v1	54.35	0.0	0.0504050954969266	-	primosomal protein N\'
MAFF_RS16970	Mesorhizobium_loti_GCF_000009625.1_ASM962v1	73.73	0.0	0.021896744683957	-	primosomal protein N\'
RHE_RS19825	Rhizobium_etli_GCF_000092045.1_ASM9204v1	100.00	0.0	0.0406984190229533	-	primosomal protein N\'
REMIM1_RS19590	Rhizobium_etli_GCF_000442435.1_ASM44243v1	99.59	0.0	0.034777735243857	-	primosomal protein N\'
RL_RS22755	Rhizobium_leguminosarum_GCF_000009265.1_ASM926v1	96.48	0.0	0.0240934380594774	-	primosomal protein N\'
NGR_c31160	Sinorhizobium_fredii_GCF_000018545.1_ASM1854v1	82.14	0.0	0.0174388188106726	-	primosome assembly protein PriA
SMc02496	Sinorhizobium_meliloti_GCF_000006965.1_ASM696v1	82.00	0.0	0.0285294645970477	priA	primosome assembly protein PriA
AZC_RS21255	Azorhizobium_caulinodans_GCF_000010525.1_ASM1052v1	56.03	0.0
/home/htaboada/sp27/red_etli/bin/footprint_discovery_enero_2018/etli_23_Feb_2018/Rhizobiales/Rhizobium_etli_GCF_000092045.1_ASM9204v1/RHE_RS13140/RHE_RS13140_Rhizobium_etli_GCF_000092045.1_ASM9204v1_Rhizobiales_taxfreq_ortho_bbh.tab
AAV28_RS15130	Bradyrhizobium_diazoefficiens_GCF_001642675.1_ASM164267v1	61.78	5e-135	0.0305511855264636	-	MULTISPECIES: tRNA dihydrouridine(20
BBTA_RS16150	Bradyrhizobium_sp._BTAi1_GCF_000015165.1_ASM1516v1	61.27	7e-134	0.0735347064175942	-	tRNA dihydrouridine(20
MAFF_RS03370	Mesorhizobium_loti_GCF_000009625.1_ASM962v1	70.75	1e-166	0.0318313788461227	-	tRNA dihydrouridine(20
RHE_RS13140	Rhizobium_etli_GCF_000092045.1_ASM9204v1	100.00	0.0	0.0406984190229533	-	tRNA dihydrouridine(20/20a) synthase DusA
REMIM1_RS12970	Rhizobium_etli_GCF_000442435.1_ASM44243v1	99.40	0.0	0.0297737445612876	-	tRNA dihydrouridine(20/20a) synthase DusA
RL_RS15330	Rhizobium_leguminosarum_GCF_000009265.1_ASM926v1	93.99	0.0	0.0174214090583914	-	tRNA dihydrouridine(20
NGR_c17550	Sinorhizobium_fredii_GCF_000018545.1_ASM1854v1	62.46	1e-151	0.0330280659293041	-	tRNA-dihydrouridine synthase A
SMc04235	Sinorhizobium_meliloti_GCF_000006965.1_ASM696v1	59.77	3e-144	0.0438508437324993	-	tRNA-dihydrouridine synthase A
AZC_RS08475	Azorhizobium_caulinodans_GCF_000010525.1_ASM1052v1	58.13	4e-122	0.114869425263486	-	tRNA dihydrouridine(20
/home/htaboada/sp27/red_etli/bin/footprint_discovery_enero_2018/etli_23_Feb_2018/Rhizobiales/Rhizobium_etli_GCF_000092045.1_ASM9204v1/RHE_RS09900/RHE_RS09900_Rhizobium_etli_GCF_000092045.1_ASM9204v1_Rhizobiales_taxfreq_ortho_bbh.tab
AAV28_RS07625	Bradyrhizobium_diazoefficiens_GCF_001642675.1_ASM164267v1	45.83	2e-08	0.044246544555568	-	MULTISPECIES: GlsB
BBTA_RS14090	Bradyrhizobium_sp._BTAi1_GCF_000015165.1_ASM1516v1	47.89	1e-10	0.039494901666423	-	GlsB
MAFF_RS13940	Mesorhizobium_loti_GCF_000009625.1_ASM962v1	45.71	9e-11	0.0271681832189837	-	GlsB
RHE_RS09900	Rhizobium_etli_GCF_000092045.1_ASM9204v1	100.00	2e-41	0.0406984190229533	-	MULTISPECIES: GlsB/YeaQ/YmgE family stress response membrane protein
REMIM1_RS10065	Rhizobium_etli_GCF_000442435.1_ASM44243v1	100.00	2e-41	0.034777735243857	-	MULTISPECIES: GlsB/YeaQ/YmgE family stress response membrane protein
RL_RS11635	Rhizobium_leguminosarum_GCF_000009265.1_ASM926v1	100.00	2e-41	0.025946779448668	-	MULTISPECIES: GlsB
NGR_c02410	Sinorhizobium_fredii_GCF_000018545.1_ASM1854v1	48.57	1e-11	0.0301215961275253	-	hypothetical protein NGR_c02410
SMc02320	Sinorhizobium_meliloti_GCF_000006965.1_ASM696v1	48.57	9e-12	0.0248312006678008	-	hypothetical protein SMc02320
/home/htaboada/sp27/red_etli/bin/footprint_discovery_enero_2018/etli_23_Feb_2018/Rhizobiales/Rhizobium_etli_GCF_000092045.1_ASM9204v1/RHE_RS04270/RHE_RS04270_Rhizobium_etli_GCF_000092045.1_ASM9204v1_Rhizobiales_taxfreq_ortho_bbh.tab
AAV28_RS34520	Bradyrhizobium_diazoefficiens_GCF_001642675.1_ASM164267v1	54.91	0.0	0.033184908416676	-	MULTISPECIES: DNA mismatch repair protein MutL
BBTA_RS07905	Bradyrhizobium_sp._BTAi1_GCF_000015165.1_ASM1516v1	52.73	0.0	0.054769173029128	-	DNA mismatch repair protein MutL
MAFF_RS33645	Mesorhizobium_loti_GCF_000009625.1_ASM962v1	61.84	0.0	0.0328451170259355	-	DNA mismatch repair protein MutL
RHE_RS04270	Rhizobium_etli_GCF_000092045.1_ASM9204v1	100.00	0.0	0.0406984190229533	-	DNA mismatch repair protein MutL
REMIM1_RS04695	Rhizobium_etli_GCF_000442435.1_ASM44243v1	99.18	0.0	0.0342773361756	-	DNA mismatch repair endonuclease MutL
RL_RS04755	Rhizobium_leguminosarum_GCF_000009265.1_ASM926v1	93.11	0.0	0.0374374960616495	-	DNA mismatch repair protein MutL
NGR_c04290	Sinorhizobium_fredii_GCF_000018545.1_ASM1854v1	76.38	0.0	0.0420116998620748	mutL	DNA mismatch repair protein
SMc00932	Sinorhizobium_meliloti_GCF_000006965.1_ASM696v1	74.96	0.0	0.0404167415124843	mutL	DNA mismatch repair protein
AZC_RS12385	Azorhizobium_caulinodans_GCF_000010525.1_ASM1052v1	51.41	0.0	0.0759306370385754	-	DNA mismatch repair protein MutL
/home/htaboada/sp27/red_etli/bin/footprint_discovery_enero_2018/etli_23_Feb_2018/Rhizobiales/Rhizobium_etli_GCF_000092045.1_ASM9204v1/RHE_RS02430/RHE_RS02430_Rhizobium_etli_GCF_000092045.1_ASM9204v1_Rhizobiales_taxfreq_ortho_bbh.tab
AAV28_RS43955	Bradyrhizobium_diazoefficiens_GCF_001642675.1_ASM164267v1	54.95	3e-35	0.0168558264973593	-	MULTISPECIES: PRC-barrel domain containing protein
BBTA_RS18260	Bradyrhizobium_sp._BTAi1_GCF_000015165.1_ASM1516v1	57.80	6e-34	0.0248752419335482	-	PRC-barrel domain containing protein
MAFF_RS02535	Mesorhizobium_loti_GCF_000009625.1_ASM962v1	43.64	4e-20	0.0300066501224596	-	MULTISPECIES: photosystem reaction center subunit H
RHE_RS02430	Rhizobium_etli_GCF_000092045.1_ASM9204v1	100.00	2e-93	0.0406984190229533	-	PRC-barrel domain containing protein
REMIM1_RS02850	Rhizobium_etli_GCF_000442435.1_ASM44243v1	100.00	2e-93	0.0382805287216555	-	PRC-barrel domain containing protein
RL_RS02645	Rhizobium_leguminosarum_GCF_000009265.1_ASM926v1	94.62	2e-88	0.0392908374508401	-	MULTISPECIES: PRC-barrel domain containing protein
SM_b20522	Sinorhizobium_meliloti_GCF_000006965.1_ASM696v1	58.33	1e-47	0.0285294645970477	-	hypothetical protein SM_b20522 (plasmid)
AZC_RS23590	Azorhizobium_caulinodans_GCF_000010525.1_ASM1052v1	51.75	3e-36	0.0577592025336172	-	PRC-barrel domain containing protein
/home/htaboada/sp27/red_etli/bin/footprint_discovery_enero_2018/etli_23_Feb_2018/Rhizobiales/Rhizobium_etli_GCF_000092045.1_ASM9204v1/RHE_RS00955/RHE_RS00955_Rhizobium_etli_GCF_000092045.1_ASM9204v1_Rhizobiales_taxfreq_ortho_bbh.tab
MAFF_RS13395	Mesorhizobium_loti_GCF_000009625.1_ASM962v1	76.45	0.0	0.0259516974032083	-	MULTISPECIES: ABC transporter ATP-binding protein
RHE_RS00955	Rhizobium_etli_GCF_000092045.1_ASM9204v1	100.00	0.0	0.0406984190229533	-	ABC transporter ATP-binding protein
REMIM1_RS01395	Rhizobium_etli_GCF_000442435.1_ASM44243v1	100.00	0.0	0.0372797305851417	-	ABC transporter ATP-binding protein
RL_RS01045	Rhizobium_leguminosarum_GCF_000009265.1_ASM926v1	98.01	0.0	0.025946779448668	-	ABC transporter ATP-binding protein
NGR_c34500	Sinorhizobium_fredii_GCF_000018545.1_ASM1854v1	78.69	0.0	0.0356703112036484	-	sugar ABC transporter ATP-binding protein
SMc04127	Sinorhizobium_meliloti_GCF_000006965.1_ASM696v1	78.96	0.0	0.0264161709231923	-	ABC transporter ATP-binding protein
/home/htaboada/sp27/red_etli/bin/footprint_discovery_enero_2018/etli_23_Feb_2018/Rhizobiales/Rhizobium_etli_GCF_000092045.1_ASM9204v1/RHE_RS26435/RHE_RS26435_Rhizobium_etli_GCF_000092045.1_ASM9204v1_Rhizobiales_taxfreq_ortho_bbh.tab
AAV28_RS00735	Bradyrhizobium_diazoefficiens_GCF_001642675.1_ASM164267v1	66.78	8e-105
BBTA_RS29920	Bradyrhizobium_sp._BTAi1_GCF_000015165.1_ASM1516v1	66.45	2e-105
MAFF_RS28310	Mesorhizobium_loti_GCF_000009625.1_ASM962v1	41.22	2e-49	0.0229104828637698	-	hydrogen peroxide-inducible genes activator
RHE_RS26435	Rhizobium_etli_GCF_000092045.1_ASM9204v1	100.00	0.0	0.0404138146941215	-	hydrogen peroxide-inducible genes activator
REMIM1_RS29450	Rhizobium_etli_GCF_000442435.1_ASM44243v1	98.68	0.0	0.0275219487541314	-	hydrogen peroxide-inducible genes activator
RL_RS34735	Rhizobium_leguminosarum_GCF_000009265.1_ASM926v1	87.79	2e-158	0.0200160870032582	-	hydrogen peroxide-inducible genes activator
NGR_c03810	Sinorhizobium_fredii_GCF_000018545.1_ASM1854v1	42.28	4e-61	0.0174388188106726	-	LysR family transcriptional regulator
SMc00818	Sinorhizobium_meliloti_GCF_000006965.1_ASM696v1	40.48	2e-53	0.0319635668170627	oxyR	hydrogen peroxide-inducible genes activator (morphology and AUTO-aggregation control protein)
AZC_RS21345	Azorhizobium_caulinodans_GCF_000010525.1_ASM1052v1	45.96	5e-61	0.0837183946835574	-	hydrogen peroxide-inducible genes activator
/home/htaboada/sp27/red_etli/bin/footprint_discovery_enero_2018/etli_23_Feb_2018/Rhizobiales/Rhizobium_etli_GCF_000092045.1_ASM9204v1/RHE_RS25145/RHE_RS25145_Rhizobium_etli_GCF_000092045.1_ASM9204v1_Rhizobiales_taxfreq_ortho_bbh.tab
AAV28_RS00340	Bradyrhizobium_diazoefficiens_GCF_001642675.1_ASM164267v1	34.67	2e-10	0.00948140240476458	-	MULTISPECIES: transcriptional regulator
BBTA_RS38910	Bradyrhizobium_sp._BTAi1_GCF_000015165.1_ASM1516v1	58.89	3e-34	0.0222567954142273	-	hypothetical protein
RHE_RS25145	Rhizobium_etli_GCF_000092045.1_ASM9204v1	100.00	2e-65	0.0404138146941215	-	metal resistance protein
REMIM1_RS25390	Rhizobium_etli_GCF_000442435.1_ASM44243v1	98.91	1e-64	0.0332765380390862	-	RcnR/FrmR transcriptional regulator domain-containing protein
RL_RS06125	Rhizobium_leguminosarum_GCF_000009265.1_ASM926v1	93.48	5e-62	0.0307654670605635	-	NreA
SMa1639	Sinorhizobium_meliloti_GCF_000006965.1_ASM696v1	84.09	2e-52	0.0245670389585689	-	hypothetical protein SMa1639 (plasmid)
AZC_RS22025	Azorhizobium_caulinodans_GCF_000010525.1_ASM1052v1	31.46	2e-08	0.0395877680286589	-	transcriptional regulator
/home/htaboada/sp27/red_etli/bin/footprint_discovery_enero_2018/etli_23_Feb_2018/Rhizobiales/Rhizobium_etli_GCF_000092045.1_ASM9204v1/RHE_RS18530/RHE_RS18530_Rhizobium_etli_GCF_000092045.1_ASM9204v1_Rhizobiales_taxfreq_ortho_bbh.tab
AAV28_RS38955	Bradyrhizobium_diazoefficiens_GCF_001642675.1_ASM164267v1	45.23	3e-71	0.0421395662433981	-	MULTISPECIES: creatininase
RHE_RS18530	Rhizobium_etli_GCF_000092045.1_ASM9204v1	100.00	0.0	0.0404138146941215	-	creatininase
REMIM1_RS18300	Rhizobium_etli_GCF_000442435.1_ASM44243v1	99.24	0.0	0.0322757399025723	-	creatininase
RL_RS21385	Rhizobium_leguminosarum_GCF_000009265.1_ASM926v1	89.31	2e-165	0.0359548229502971	-	creatininase
NGR_c29200	Sinorhizobium_fredii_GCF_000018545.1_ASM1854v1	70.61	2e-128	0.0449181696638536	-	creatinine amidohydrolase
SMc02977	Sinorhizobium_meliloti_GCF_000006965.1_ASM696v1	74.05	2e-134	0.0541531503925443	-	hypothetical protein SMc02977
/home/htaboada/sp27/red_etli/bin/footprint_discovery_enero_2018/etli_23_Feb_2018/Rhizobiales/Rhizobium_etli_GCF_000092045.1_ASM9204v1/RHE_RS16005/RHE_RS16005_Rhizobium_etli_GCF_000092045.1_ASM9204v1_Rhizobiales_taxfreq_ortho_bbh.tab
AAV28_RS10055	Bradyrhizobium_diazoefficiens_GCF_001642675.1_ASM164267v1	49.14	3e-130	0.0251081582200247	-	cysteine desulfurase
BBTA_RS09520	Bradyrhizobium_sp._BTAi1_GCF_000015165.1_ASM1516v1	53.42	2e-142
MAFF_RS21060	Mesorhizobium_loti_GCF_000009625.1_ASM962v1	72.17	0.0	0.0334533599338232	-	cysteine desulfurase
RHE_RS16005	Rhizobium_etli_GCF_000092045.1_ASM9204v1	100.00	0.0	0.0404138146941215	-	cysteine desulfurase
REMIM1_RS15760	Rhizobium_etli_GCF_000442435.1_ASM44243v1	99.27	0.0	0.0355283338462424	-	cytochrome-c class 1 protein
RL_RS18425	Rhizobium_leguminosarum_GCF_000009265.1_ASM926v1	95.15	0.0	0.0322481401719159	-	cysteine desulfurase
NGR_c23920	Sinorhizobium_fredii_GCF_000018545.1_ASM1854v1	82.80	0.0	0.0380483319505583	-	hypothetical protein NGR_c23920
SM_b20848	Sinorhizobium_meliloti_GCF_000006965.1_ASM696v1	83.25	0.0
AZC_RS04040	Azorhizobium_caulinodans_GCF_000010525.1_ASM1052v1	47.34	3e-120	0.0551632833186231	-	cysteine desulfurase
/home/htaboada/sp27/red_etli/bin/footprint_discovery_enero_2018/etli_23_Feb_2018/Rhizobiales/Rhizobium_etli_GCF_000092045.1_ASM9204v1/RHE_RS12060/RHE_RS12060_Rhizobium_etli_GCF_000092045.1_ASM9204v1_Rhizobiales_taxfreq_ortho_bbh.tab
MAFF_RS05175	Mesorhizobium_loti_GCF_000009625.1_ASM962v1	89.27	0.0	0.0143950821533421	-	LacI family transcriptional regulator
RHE_RS12060	Rhizobium_etli_GCF_000092045.1_ASM9204v1	100.00	0.0	0.0404138146941215	-	LacI family transcriptional regulator
REMIM1_RS11895	Rhizobium_etli_GCF_000442435.1_ASM44243v1	100.00	0.0	0.0365291319827563	-	LacI family transcriptional regulator
NGR_c26060	Sinorhizobium_fredii_GCF_000018545.1_ASM1854v1	31.65	9e-38	0.0380483319505583	-	sugar ABC transporter substrate-binding protein
SMa0218	Sinorhizobium_meliloti_GCF_000006965.1_ASM696v1	31.32	8e-22	0.0298502731432073	-	ABC transporter substrate-binding protein (plasmid)
/home/htaboada/sp27/red_etli/bin/footprint_discovery_enero_2018/etli_23_Feb_2018/Rhizobiales/Rhizobium_etli_GCF_000092045.1_ASM9204v1/RHE_RS10515/RHE_RS10515_Rhizobium_etli_GCF_000092045.1_ASM9204v1_Rhizobiales_taxfreq_ortho_bbh.tab
AAV28_RS13465	Bradyrhizobium_diazoefficiens_GCF_001642675.1_ASM164267v1	47.87	5e-120	0.029848859422407	-	MULTISPECIES: ABC transporter substrate-binding protein
BBTA_RS18665	Bradyrhizobium_sp._BTAi1_GCF_000015165.1_ASM1516v1	48.36	2e-120	0.0342580086277813	-	ABC transporter substrate-binding protein
RHE_RS10515	Rhizobium_etli_GCF_000092045.1_ASM9204v1	100.00	0.0	0.0404138146941215	-	ABC transporter substrate-binding protein
REMIM1_RS10360	Rhizobium_etli_GCF_000442435.1_ASM44243v1	100.00	0.0	0.0360287329144993	-	ABC transporter substrate-binding protein
RL_RS12005	Rhizobium_leguminosarum_GCF_000009265.1_ASM926v1	92.98	0.0	0.0415148471178688	-	ABC transporter substrate-binding protein
SMc02471	Sinorhizobium_meliloti_GCF_000006965.1_ASM696v1	74.56	0.0	0.0361901541647735	-	periplasmic binding ABC transporter protein
/home/htaboada/sp27/red_etli/bin/footprint_discovery_enero_2018/etli_23_Feb_2018/Rhizobiales/Rhizobium_etli_GCF_000092045.1_ASM9204v1/RHE_RS09690/RHE_RS09690_Rhizobium_etli_GCF_000092045.1_ASM9204v1_Rhizobiales_taxfreq_ortho_bbh.tab
AAV28_RS11080	Bradyrhizobium_diazoefficiens_GCF_001642675.1_ASM164267v1	46.13	1e-93	0.0126418698730194	-	ABC transporter permease
BBTA_RS18355	Bradyrhizobium_sp._BTAi1_GCF_000015165.1_ASM1516v1	47.30	5e-87	0.0222567954142273	-	amino acid ABC transporter permease
MAFF_RS33155	Mesorhizobium_loti_GCF_000009625.1_ASM962v1	64.81	6e-162	0.0245324639514703	-	amino acid ABC transporter permease
RHE_RS09690	Rhizobium_etli_GCF_000092045.1_ASM9204v1	100.00	0.0	0.0404138146941215	-	amino acid ABC transporter permease
REMIM1_RS09855	Rhizobium_etli_GCF_000442435.1_ASM44243v1	99.50	0.0	0.0432845194042249	-	amino acid ABC transporter permease
RL_RS11420	Rhizobium_leguminosarum_GCF_000009265.1_ASM926v1	77.75	0.0	0.0263174477265061	-	amino acid ABC transporter permease
NGR_c13160	Sinorhizobium_fredii_GCF_000018545.1_ASM1854v1	70.20	4e-173	0.0324996168744352	aapQ	amino-acid ABC transporter membrane protein
SMc02119	Sinorhizobium_meliloti_GCF_000006965.1_ASM696v1	66.67	2e-168	0.0369826392924693	aapQ	general L-amino acid transport permease ABC transporter protein
AZC_RS08220	Azorhizobium_caulinodans_GCF_000010525.1_ASM1052v1	49.77	1e-113	0.0499714448886351	-	amino acid ABC transporter permease
/home/htaboada/sp27/red_etli/bin/footprint_discovery_enero_2018/etli_23_Feb_2018/Rhizobiales/Rhizobium_etli_GCF_000092045.1_ASM9204v1/RHE_RS09350/RHE_RS09350_Rhizobium_etli_GCF_000092045.1_ASM9204v1_Rhizobiales_taxfreq_ortho_bbh.tab
AAV28_RS20435	Bradyrhizobium_diazoefficiens_GCF_001642675.1_ASM164267v1	43.98	1e-50	0.0252837397460389	-	MULTISPECIES: lipoprotein
BBTA_RS20600	Bradyrhizobium_sp._BTAi1_GCF_000015165.1_ASM1516v1	44.40	6e-53	0.0370946590237122	-	LysM peptidoglycan-binding domain-containing protein
MAFF_RS05465	Mesorhizobium_loti_GCF_000009625.1_ASM962v1	35.36	4e-77	0.0362918268372991	-	LysM peptidoglycan-binding domain-containing protein
RHE_RS09350	Rhizobium_etli_GCF_000092045.1_ASM9204v1	100.00	0.0	0.0404138146941215	-	LysM peptidoglycan-binding domain-containing protein
REMIM1_RS09515	Rhizobium_etli_GCF_000442435.1_ASM44243v1	100.00	0.0	0.0325259394367008	-	LysM peptidoglycan-binding domain-containing protein
RL_RS10650	Rhizobium_leguminosarum_GCF_000009265.1_ASM926v1	87.64	0.0	0.0266881160043442	-	LysM peptidoglycan-binding domain-containing protein
NGR_c13780	Sinorhizobium_fredii_GCF_000018545.1_ASM1854v1	48.99	8e-140	0.0288004734903532	-	lipoprotein
SMc02060	Sinorhizobium_meliloti_GCF_000006965.1_ASM696v1	48.82	7e-148	0.0327560519447585	lppB	lipoprotein
AZC_RS08975	Azorhizobium_caulinodans_GCF_000010525.1_ASM1052v1	49.59	1e-37	0.0519183842998806	-	M23 family peptidase
/home/htaboada/sp27/red_etli/bin/footprint_discovery_enero_2018/etli_23_Feb_2018/Rhizobiales/Rhizobium_etli_GCF_000092045.1_ASM9204v1/RHE_RS08300/RHE_RS08300_Rhizobium_etli_GCF_000092045.1_ASM9204v1_Rhizobiales_taxfreq_ortho_bbh.tab
AAV28_RS21135	Bradyrhizobium_diazoefficiens_GCF_001642675.1_ASM164267v1	67.05	0.0	0.0284442072142937	-	MULTISPECIES: proline--tRNA ligase
BBTA_RS21170	Bradyrhizobium_sp._BTAi1_GCF_000015165.1_ASM1516v1	66.29	0.0	0.0484412606074359	-	proline--tRNA ligase
MAFF_RS06535	Mesorhizobium_loti_GCF_000009625.1_ASM962v1	74.89	0.0	0.0289929119426467	-	proline--tRNA ligase
RHE_RS08300	Rhizobium_etli_GCF_000092045.1_ASM9204v1	100.00	0.0	0.0404138146941215	-	proline--tRNA ligase
REMIM1_RS08460	Rhizobium_etli_GCF_000442435.1_ASM44243v1	100.00	0.0	0.0352781343121139	-	proline--tRNA ligase
RL_RS08940	Rhizobium_leguminosarum_GCF_000009265.1_ASM926v1	97.27	0.0	0.0266881160043442	-	proline--tRNA ligase
NGR_c10680	Sinorhizobium_fredii_GCF_000018545.1_ASM1854v1	87.95	0.0	0.0367272093133861	proS	prolyl-tRNA synthetase
SMc01934	Sinorhizobium_meliloti_GCF_000006965.1_ASM696v1	87.50	0.0	0.0472849459525143	proS	prolyl-tRNA synthetase
AZC_RS08750	Azorhizobium_caulinodans_GCF_000010525.1_ASM1052v1	69.86	0.0	0.0752816572348269	-	proline--tRNA ligase
/home/htaboada/sp27/red_etli/bin/footprint_discovery_enero_2018/etli_23_Feb_2018/Rhizobiales/Rhizobium_etli_GCF_000092045.1_ASM9204v1/RHE_RS03510/RHE_RS03510_Rhizobium_etli_GCF_000092045.1_ASM9204v1_Rhizobiales_taxfreq_ortho_bbh.tab
AAV28_RS41255	Bradyrhizobium_diazoefficiens_GCF_001642675.1_ASM164267v1	53.38	8e-104
BBTA_RS01295	Bradyrhizobium_sp._BTAi1_GCF_000015165.1_ASM1516v1	56.08	8e-109	0.0250934458101583	-	bifunctional methylenetetrahydrofolate dehydrogenase
MAFF_RS26590	Mesorhizobium_loti_GCF_000009625.1_ASM962v1	67.56	1e-146	0.043793489367914	-	bifunctional methylenetetrahydrofolate dehydrogenase
RHE_RS03510	Rhizobium_etli_GCF_000092045.1_ASM9204v1	100.00	0.0	0.0404138146941215	-	bifunctional methylenetetrahydrofolate dehydrogenase/methenyltetrahydrofolate cyclohydrolase
REMIM1_RS03910	Rhizobium_etli_GCF_000442435.1_ASM44243v1	99.00	0.0	0.0390311273240409	-	bifunctional methylenetetrahydrofolate dehydrogenase/methenyltetrahydrofolate cyclohydrolase FolD
RL_RS03895	Rhizobium_leguminosarum_GCF_000009265.1_ASM926v1	94.31	0.0	0.0181627456140676	-	bifunctional methylenetetrahydrofolate dehydrogenase
NGR_c03080	Sinorhizobium_fredii_GCF_000018545.1_ASM1854v1	84.28	0.0	0.0219306357770579	folD2	bifunctional 5,10-methylene-tetrahydrofolate dehydrogenase
SMc03059	Sinorhizobium_meliloti_GCF_000006965.1_ASM696v1	83.95	0.0	0.0198121281923943	folD2	bifunctional 5,10-methylene-tetrahydrofolate dehydrogenase
AZC_RS11935	Azorhizobium_caulinodans_GCF_000010525.1_ASM1052v1	57.79	7e-110	0.133689839572192	-	bifunctional methylenetetrahydrofolate dehydrogenase
/home/htaboada/sp27/red_etli/bin/footprint_discovery_enero_2018/etli_23_Feb_2018/Rhizobiales/Rhizobium_etli_GCF_000092045.1_ASM9204v1/RHE_RS02440/RHE_RS02440_Rhizobium_etli_GCF_000092045.1_ASM9204v1_Rhizobiales_taxfreq_ortho_bbh.tab
AAV28_RS34500	Bradyrhizobium_diazoefficiens_GCF_001642675.1_ASM164267v1	59.23	2e-51
BBTA_RS07925	Bradyrhizobium_sp._BTAi1_GCF_000015165.1_ASM1516v1	56.92	1e-50
RHE_RS02440	Rhizobium_etli_GCF_000092045.1_ASM9204v1	100.00	3e-94	0.0404138146941215	-	lactoylglutathione lyase
REMIM1_RS02860	Rhizobium_etli_GCF_000442435.1_ASM44243v1	98.47	6e-93	0.0362789324486278	-	lactoylglutathione lyase
RL_RS02655	Rhizobium_leguminosarum_GCF_000009265.1_ASM926v1	90.84	1e-86	0.0177920773362295	-	MULTISPECIES: lactoylglutathione lyase
AZC_RS04925	Azorhizobium_caulinodans_GCF_000010525.1_ASM1052v1	56.49	3e-51
/home/htaboada/sp27/red_etli/bin/footprint_discovery_enero_2018/etli_23_Feb_2018/Rhizobiales/Rhizobium_etli_GCF_000092045.1_ASM9204v1/RHE_RS02360/RHE_RS02360_Rhizobium_etli_GCF_000092045.1_ASM9204v1_Rhizobiales_taxfreq_ortho_bbh.tab
MAFF_RS30900	Mesorhizobium_loti_GCF_000009625.1_ASM962v1	87.26	0.0	0.037711060289037	-	sugar ABC transporter substrate-binding protein
RHE_RS02360	Rhizobium_etli_GCF_000092045.1_ASM9204v1	100.00	0.0	0.0404138146941215	-	MULTISPECIES: sugar ABC transporter substrate-binding protein
REMIM1_RS02780	Rhizobium_etli_GCF_000442435.1_ASM44243v1	100.00	0.0	0.0420335217335825	-	MULTISPECIES: sugar ABC transporter substrate-binding protein
RL_RS02560	Rhizobium_leguminosarum_GCF_000009265.1_ASM926v1	95.62	0.0	0.0500402175081454	-	sugar ABC transporter substrate-binding protein
NGR_c01100	Sinorhizobium_fredii_GCF_000018545.1_ASM1854v1	86.25	0.0	0.0425401489169437	-	periplasmic binding protein
SMc02171	Sinorhizobium_meliloti_GCF_000006965.1_ASM696v1	85.62	0.0	0.0406809032217162	-	periplasmic binding ABC transporter protein
/home/htaboada/sp27/red_etli/bin/footprint_discovery_enero_2018/etli_23_Feb_2018/Rhizobiales/Rhizobium_etli_GCF_000092045.1_ASM9204v1/RHE_RS02355/RHE_RS02355_Rhizobium_etli_GCF_000092045.1_ASM9204v1_Rhizobiales_taxfreq_ortho_bbh.tab
MAFF_RS30895	Mesorhizobium_loti_GCF_000009625.1_ASM962v1	55.18	7e-133	0.048456684995053	-	ROK family transcriptional regulator
RHE_RS02355	Rhizobium_etli_GCF_000092045.1_ASM9204v1	100.00	0.0	0.0404138146941215	-	ROK family transcriptional regulator
REMIM1_RS02775	Rhizobium_etli_GCF_000442435.1_ASM44243v1	100.00	0.0	0.038530728255784	-	ROK family transcriptional regulator
RL_RS02555	Rhizobium_leguminosarum_GCF_000009265.1_ASM926v1	93.98	0.0	0.0459628664519262	-	ROK family transcriptional regulator
NGR_c01090	Sinorhizobium_fredii_GCF_000018545.1_ASM1854v1	72.13	0.0	0.0412190262797715	-	ROK family protein
SMc02172	Sinorhizobium_meliloti_GCF_000006965.1_ASM696v1	72.13	0.0	0.0406809032217162	-	transcriptional regulator
/home/htaboada/sp27/red_etli/bin/footprint_discovery_enero_2018/etli_23_Feb_2018/Rhizobiales/Rhizobium_etli_GCF_000092045.1_ASM9204v1/RHE_RS28515/RHE_RS28515_Rhizobium_etli_GCF_000092045.1_ASM9204v1_Rhizobiales_taxfreq_ortho_bbh.tab
AAV28_RS28010	Bradyrhizobium_diazoefficiens_GCF_001642675.1_ASM164267v1	64.84	1e-89	0.0203674570176424	-	MULTISPECIES: glutathione-dependent formaldehyde-activating enzyme
BBTA_RS27895	Bradyrhizobium_sp._BTAi1_GCF_000015165.1_ASM1516v1	65.38	1e-88
MAFF_RS04620	Mesorhizobium_loti_GCF_000009625.1_ASM962v1	73.51	7e-105	0.0326423693899729	-	glutathione-dependent formaldehyde-activating enzyme
RHE_RS28515	Rhizobium_etli_GCF_000092045.1_ASM9204v1	100.00	7e-143	0.0401292103652897	gfa	S-(hydroxymethyl)glutathione synthase
REMIM1_RS31955	Rhizobium_etli_GCF_000442435.1_ASM44243v1	99.47	3e-142	0.0370295310510132	-	S-(hydroxymethyl)glutathione synthase
RL_RS35530	Rhizobium_leguminosarum_GCF_000009265.1_ASM926v1	92.63	6e-133	0.0359548229502971	-	S-(hydroxymethyl)glutathione synthase
NGR_c20490	Sinorhizobium_fredii_GCF_000018545.1_ASM1854v1	75.79	3e-112	0.0406905772249026	gfa2	glutathione-dependent formaldehyde-activating protein
SM_b20186	Sinorhizobium_meliloti_GCF_000006965.1_ASM696v1	59.04	3e-81	0.0282653028878158	-	glutathione-dependent formaldehyde-activating protein (plasmid)
/home/htaboada/sp27/red_etli/bin/footprint_discovery_enero_2018/etli_23_Feb_2018/Rhizobiales/Rhizobium_etli_GCF_000092045.1_ASM9204v1/RHE_RS27640/RHE_RS27640_Rhizobium_etli_GCF_000092045.1_ASM9204v1_Rhizobiales_taxfreq_ortho_bbh.tab
RHE_RS27640	Rhizobium_etli_GCF_000092045.1_ASM9204v1	100.00	0.0	0.0401292103652897	-	peptide ABC transporter
REMIM1_RS32845	Rhizobium_etli_GCF_000442435.1_ASM44243v1	99.53	0.0	0.0407825240629402	-	peptide ABC transporter substrate-binding protein
RL_RS36810	Rhizobium_leguminosarum_GCF_000009265.1_ASM926v1	94.73	0.0	0.0337308132832684	-	peptide ABC transporter
/home/htaboada/sp27/red_etli/bin/footprint_discovery_enero_2018/etli_23_Feb_2018/Rhizobiales/Rhizobium_etli_GCF_000092045.1_ASM9204v1/RHE_RS26775/RHE_RS26775_Rhizobium_etli_GCF_000092045.1_ASM9204v1_Rhizobiales_taxfreq_ortho_bbh.tab
AAV28_RS31150	Bradyrhizobium_diazoefficiens_GCF_001642675.1_ASM164267v1	57.89	1e-79	0.0316046746825486	-	MULTISPECIES: TRAP transporter small permease
BBTA_RS00610	Bradyrhizobium_sp._BTAi1_GCF_000015165.1_ASM1516v1	28.57	3e-09	0.0508415032501467	-	TRAP transporter small permease
RHE_RS26775	Rhizobium_etli_GCF_000092045.1_ASM9204v1	100.00	4e-141	0.0401292103652897	-	TRAP transporter small permease
REMIM1_RS29790	Rhizobium_etli_GCF_000442435.1_ASM44243v1	99.47	1e-140	0.0325259394367008	-	TRAP transporter small permease
RL_RS34920	Rhizobium_leguminosarum_GCF_000009265.1_ASM926v1	95.26	3e-136	0.0278001208378586	-	TRAP transporter small permease
NGR_b19290	Sinorhizobium_fredii_GCF_000018545.1_ASM1854v1	74.74	8e-108
SM_b20443	Sinorhizobium_meliloti_GCF_000006965.1_ASM696v1	73.68	1e-105	0.0470207842432824	-	permease (plasmid)
AZC_RS12505	Azorhizobium_caulinodans_GCF_000010525.1_ASM1052v1	60.53	6e-84	0.0824204350760604	-	TRAP transporter small permease
/home/htaboada/sp27/red_etli/bin/footprint_discovery_enero_2018/etli_23_Feb_2018/Rhizobiales/Rhizobium_etli_GCF_000092045.1_ASM9204v1/RHE_RS23170/RHE_RS23170_Rhizobium_etli_GCF_000092045.1_ASM9204v1_Rhizobiales_taxfreq_ortho_bbh.tab
RHE_RS23170	Rhizobium_etli_GCF_000092045.1_ASM9204v1	100.00	2e-61	0.0401292103652897	-	prevent-host-death family protein
REMIM1_RS22140	Rhizobium_etli_GCF_000442435.1_ASM44243v1	100.00	2e-61	0.0242693548104613	-	prevent-host-death family protein
RL_RS28885	Rhizobium_leguminosarum_GCF_000009265.1_ASM926v1	90.70	2e-56	0.0274294525600205	-	MULTISPECIES: type II toxin-antitoxin system Phd
NGR_b10460	Sinorhizobium_fredii_GCF_000018545.1_ASM1854v1	74.42	4e-44	0.0441254960815503	-	hypothetical protein NGR_b10460 (plasmid)
/home/htaboada/sp27/red_etli/bin/footprint_discovery_enero_2018/etli_23_Feb_2018/Rhizobiales/Rhizobium_etli_GCF_000092045.1_ASM9204v1/RHE_RS21085/RHE_RS21085_Rhizobium_etli_GCF_000092045.1_ASM9204v1_Rhizobiales_taxfreq_ortho_bbh.tab
AAV28_RS00010	Bradyrhizobium_diazoefficiens_GCF_001642675.1_ASM164267v1	82.42	0.0	0.0263372289021238	-	MULTISPECIES: transcription termination factor Rho
BBTA_RS00775	Bradyrhizobium_sp._BTAi1_GCF_000015165.1_ASM1516v1	83.61	0.0	0.0645883474765813	rho	MULTISPECIES: transcription termination factor Rho
MAFF_RS18515	Mesorhizobium_loti_GCF_000009625.1_ASM962v1	93.30	0.0	0.0448072275477268	-	MULTISPECIES: transcription termination factor Rho
RHE_RS21085	Rhizobium_etli_GCF_000092045.1_ASM9204v1	100.00	0.0	0.0401292103652897	-	MULTISPECIES: transcription termination factor Rho
REMIM1_RS20960	Rhizobium_etli_GCF_000442435.1_ASM44243v1	100.00	0.0	0.0405323245288117	-	MULTISPECIES: transcription termination factor Rho
RL_RS24385	Rhizobium_leguminosarum_GCF_000009265.1_ASM926v1	99.52	0.0	0.0559709099535553	-	MULTISPECIES: transcription termination factor Rho
NGR_c33470	Sinorhizobium_fredii_GCF_000018545.1_ASM1854v1	96.20	0.0	0.0454466187187224	rho	transcription termination factor Rho
SMc02796	Sinorhizobium_meliloti_GCF_000006965.1_ASM696v1	96.67	0.0	0.0298502731432073	rho	transcription termination factor Rho
AZC_RS24160	Azorhizobium_caulinodans_GCF_000010525.1_ASM1052v1	83.92	0.0	0.17846944603084	-	transcription termination factor Rho
/home/htaboada/sp27/red_etli/bin/footprint_discovery_enero_2018/etli_23_Feb_2018/Rhizobiales/Rhizobium_etli_GCF_000092045.1_ASM9204v1/RHE_RS17885/RHE_RS17885_Rhizobium_etli_GCF_000092045.1_ASM9204v1_Rhizobiales_taxfreq_ortho_bbh.tab
AAV28_RS37875	Bradyrhizobium_diazoefficiens_GCF_001642675.1_ASM164267v1	40.85	1e-101	0.0212453646477132	-	potassium
BBTA_RS34535	Bradyrhizobium_sp._BTAi1_GCF_000015165.1_ASM1516v1	39.77	3e-99
MAFF_RS15770	Mesorhizobium_loti_GCF_000009625.1_ASM962v1	63.28	0.0	0.0326423693899729	-	potassium
RHE_RS17885	Rhizobium_etli_GCF_000092045.1_ASM9204v1	100.00	0.0	0.0401292103652897	-	potassium/proton antiporter
REMIM1_RS17650	Rhizobium_etli_GCF_000442435.1_ASM44243v1	100.00	0.0	0.0362789324486278	-	potassium/proton antiporter
RL_RS20695	Rhizobium_leguminosarum_GCF_000009265.1_ASM926v1	96.31	0.0	0.0318774718940778	-	potassium
AZC_RS08150	Azorhizobium_caulinodans_GCF_000010525.1_ASM1052v1	40.61	4e-92	0.040885727636156	-	potassium
/home/htaboada/sp27/red_etli/bin/footprint_discovery_enero_2018/etli_23_Feb_2018/Rhizobiales/Rhizobium_etli_GCF_000092045.1_ASM9204v1/RHE_RS08350/RHE_RS08350_Rhizobium_etli_GCF_000092045.1_ASM9204v1_Rhizobiales_taxfreq_ortho_bbh.tab
AAV28_RS22405	Bradyrhizobium_diazoefficiens_GCF_001642675.1_ASM164267v1	76.03	4e-67	0.026512810428138	-	MULTISPECIES: response regulator
BBTA_RS22240	Bradyrhizobium_sp._BTAi1_GCF_000015165.1_ASM1516v1	73.55	1e-65	0.0432043675687942	-	response regulator
MAFF_RS04560	Mesorhizobium_loti_GCF_000009625.1_ASM962v1	92.68	4e-85	0.026559940311096	-	MULTISPECIES: response regulator
RHE_RS08350	Rhizobium_etli_GCF_000092045.1_ASM9204v1	100.00	4e-90	0.0401292103652897	-	MULTISPECIES: response regulator
REMIM1_RS08510	Rhizobium_etli_GCF_000442435.1_ASM44243v1	100.00	4e-90	0.0400319254605548	-	MULTISPECIES: response regulator
RL_RS08995	Rhizobium_leguminosarum_GCF_000009265.1_ASM926v1	100.00	5e-90	0.0370668277838114	-	MULTISPECIES: response regulator
NGR_c10790	Sinorhizobium_fredii_GCF_000018545.1_ASM1854v1	98.37	4e-88	0.0412190262797715	-	response regulator in two-component regulatory system
SMc01371	Sinorhizobium_meliloti_GCF_000006965.1_ASM696v1	98.37	9e-89	0.0433225203140354	celR1	2-component receiver domain-containing protein
AZC_RS09610	Azorhizobium_caulinodans_GCF_000010525.1_ASM1052v1	79.34	1e-71	0.0681428793935933	-	response regulator
/home/htaboada/sp27/red_etli/bin/footprint_discovery_enero_2018/etli_23_Feb_2018/Rhizobiales/Rhizobium_etli_GCF_000092045.1_ASM9204v1/RHE_RS06800/RHE_RS06800_Rhizobium_etli_GCF_000092045.1_ASM9204v1_Rhizobiales_taxfreq_ortho_bbh.tab
AAV28_RS22210	Bradyrhizobium_diazoefficiens_GCF_001642675.1_ASM164267v1	45.00	3e-14	0.023176761433869	-	MULTISPECIES: hypothetical protein
BBTA_RS22050	Bradyrhizobium_sp._BTAi1_GCF_000015165.1_ASM1516v1	44.83	1e-17	0.0613152893274302	-	hypothetical protein
MAFF_RS31440	Mesorhizobium_loti_GCF_000009625.1_ASM962v1	60.67	3e-27	0.0273709308549462	-	MULTISPECIES: sel1 repeat family protein
RHE_RS06800	Rhizobium_etli_GCF_000092045.1_ASM9204v1	100.00	1e-51	0.0401292103652897	-	MULTISPECIES: sel1 repeat family protein
REMIM1_RS06975	Rhizobium_etli_GCF_000442435.1_ASM44243v1	100.00	2e-51	0.0375299301192701	-	MULTISPECIES: sel1 repeat family protein
RL_RS07685	Rhizobium_leguminosarum_GCF_000009265.1_ASM926v1	95.51	1e-42	0.0255761111708299	-	sel1 repeat family protein
NGR_c08090	Sinorhizobium_fredii_GCF_000018545.1_ASM1854v1	71.91	8e-25	0.0340849640390418	-	hypothetical protein NGR_c08090
SMc02392	Sinorhizobium_meliloti_GCF_000006965.1_ASM696v1	67.42	2e-21	0.0338126987816862	-	hypothetical protein SMc02392
/home/htaboada/sp27/red_etli/bin/footprint_discovery_enero_2018/etli_23_Feb_2018/Rhizobiales/Rhizobium_etli_GCF_000092045.1_ASM9204v1/RHE_RS02425/RHE_RS02425_Rhizobium_etli_GCF_000092045.1_ASM9204v1_Rhizobiales_taxfreq_ortho_bbh.tab
AAV28_RS03465	Bradyrhizobium_diazoefficiens_GCF_001642675.1_ASM164267v1	60.87	0.0	0.0217721092257557	-	MULTISPECIES: long-chain-fatty-acid--CoA ligase
BBTA_RS04490	Bradyrhizobium_sp._BTAi1_GCF_000015165.1_ASM1516v1	58.15	0.0	0.0344762125043914	-	long-chain-fatty-acid--CoA ligase
MAFF_RS22175	Mesorhizobium_loti_GCF_000009625.1_ASM962v1	64.74	0.0	0.0304121453943847	-	long-chain-fatty-acid--CoA ligase
RHE_RS02425	Rhizobium_etli_GCF_000092045.1_ASM9204v1	100.00	0.0	0.0401292103652897	-	long-chain-fatty-acid--CoA ligase
REMIM1_RS02845	Rhizobium_etli_GCF_000442435.1_ASM44243v1	99.65	0.0	0.0380303291875271	-	long-chain fatty acid--CoA ligase
RL_RS02640	Rhizobium_leguminosarum_GCF_000009265.1_ASM926v1	92.40	0.0	0.0400321740065163	-	long-chain-fatty-acid--CoA ligase
NGR_c01180	Sinorhizobium_fredii_GCF_000018545.1_ASM1854v1	68.20	0.0	0.0309142697098286	fadD	long-chain-fatty-acid--CoA ligase
SMc02162	Sinorhizobium_meliloti_GCF_000006965.1_ASM696v1	70.14	0.0	0.0219254218662496	fadD	long-chain-fatty-acid--CoA ligase
AZC_RS15340	Azorhizobium_caulinodans_GCF_000010525.1_ASM1052v1	39.55	3e-108	0.092155132132288	-	long-chain fatty acid--CoA ligase
/home/htaboada/sp27/red_etli/bin/footprint_discovery_enero_2018/etli_23_Feb_2018/Rhizobiales/Rhizobium_etli_GCF_000092045.1_ASM9204v1/RHE_RS26920/RHE_RS26920_Rhizobium_etli_GCF_000092045.1_ASM9204v1_Rhizobiales_taxfreq_ortho_bbh.tab
AAV28_RS10170	Bradyrhizobium_diazoefficiens_GCF_001642675.1_ASM164267v1	59.73	0.0	0.0194895493875716	-	MULTISPECIES: sugar ABC transporter substrate-binding protein
BBTA_RS08165	Bradyrhizobium_sp._BTAi1_GCF_000015165.1_ASM1516v1	57.97	4e-169
MAFF_RS29650	Mesorhizobium_loti_GCF_000009625.1_ASM962v1	25.12	2e-19	0.0293984072145719	-	ABC transporter substrate-binding protein
RHE_RS26920	Rhizobium_etli_GCF_000092045.1_ASM9204v1	100.00	0.0	0.0398446060364578	-	sugar ABC transporter substrate-binding protein
REMIM1_RS29935	Rhizobium_etli_GCF_000442435.1_ASM44243v1	99.77	0.0	0.0312749417660584	-	sugar ABC transporter substrate-binding protein
RL_RS32975	Rhizobium_leguminosarum_GCF_000009265.1_ASM926v1	94.80	0.0	0.0444801933405737	-	sugar ABC transporter substrate-binding protein
NGR_a02200	Sinorhizobium_fredii_GCF_000018545.1_ASM1854v1	27.88	4e-21	0.0303858206549598	-	ABC transporter substrate-binding protein (plasmid)
/home/htaboada/sp27/red_etli/bin/footprint_discovery_enero_2018/etli_23_Feb_2018/Rhizobiales/Rhizobium_etli_GCF_000092045.1_ASM9204v1/RHE_RS19665/RHE_RS19665_Rhizobium_etli_GCF_000092045.1_ASM9204v1_Rhizobiales_taxfreq_ortho_bbh.tab
MAFF_RS09945	Mesorhizobium_loti_GCF_000009625.1_ASM962v1	59.74	3e-158	0.0318313788461227	-	sugar ABC transporter substrate-binding protein
RHE_RS19665	Rhizobium_etli_GCF_000092045.1_ASM9204v1	100.00	0.0	0.0398446060364578	-	sugar ABC transporter substrate-binding protein
REMIM1_RS19430	Rhizobium_etli_GCF_000442435.1_ASM44243v1	99.27	0.0	0.0380303291875271	-	sugar ABC transporter substrate-binding protein
RL_RS22580	Rhizobium_leguminosarum_GCF_000009265.1_ASM926v1	96.84	0.0	0.0507815540638217	-	sugar ABC transporter substrate-binding protein
NGR_b18590	Sinorhizobium_fredii_GCF_000018545.1_ASM1854v1	83.01	0.0	0.0454466187187224	-	ABC transporter substrate-binding protein (plasmid)
SM_b20634	Sinorhizobium_meliloti_GCF_000006965.1_ASM696v1	83.25	0.0	0.0417375500586439	-	sugar uptake ABC transporter substrate-binding protein precursor (plasmid)
/home/htaboada/sp27/red_etli/bin/footprint_discovery_enero_2018/etli_23_Feb_2018/Rhizobiales/Rhizobium_etli_GCF_000092045.1_ASM9204v1/RHE_RS18895/RHE_RS18895_Rhizobium_etli_GCF_000092045.1_ASM9204v1_Rhizobiales_taxfreq_ortho_bbh.tab
MAFF_RS28930	Mesorhizobium_loti_GCF_000009625.1_ASM962v1	33.10	5e-30	0.0200720159602939	-	arabinose ABC transporter substrate-binding protein
RHE_RS18895	Rhizobium_etli_GCF_000092045.1_ASM9204v1	100.00	0.0	0.0398446060364578	-	arabinose ABC transporter substrate-binding protein
REMIM1_RS18665	Rhizobium_etli_GCF_000442435.1_ASM44243v1	99.39	0.0	0.0365291319827563	-	arabinose ABC transporter substrate-binding protein
RL_RS21810	Rhizobium_leguminosarum_GCF_000009265.1_ASM926v1	96.64	0.0	0.0315068036162397	-	arabinose ABC transporter substrate-binding protein
SM_b20508	Sinorhizobium_meliloti_GCF_000006965.1_ASM696v1	83.79	0.0	0.0282653028878158	-	sugar ABC transporter substrate-binding protein (plasmid)
/home/htaboada/sp27/red_etli/bin/footprint_discovery_enero_2018/etli_23_Feb_2018/Rhizobiales/Rhizobium_etli_GCF_000092045.1_ASM9204v1/RHE_RS18145/RHE_RS18145_Rhizobium_etli_GCF_000092045.1_ASM9204v1_Rhizobiales_taxfreq_ortho_bbh.tab
AAV28_RS06845	Bradyrhizobium_diazoefficiens_GCF_001642675.1_ASM164267v1	41.02	2e-47	0.0319558377345769	-	MULTISPECIES: aminodeoxychorismate synthase, component I
MAFF_RS12835	Mesorhizobium_loti_GCF_000009625.1_ASM962v1	61.87	2e-157	0.034467098113636	-	aminodeoxychorismate synthase, component I
RHE_RS18145	Rhizobium_etli_GCF_000092045.1_ASM9204v1	100.00	0.0	0.0398446060364578	pabB	aminodeoxychorismate synthase, component I
REMIM1_RS17910	Rhizobium_etli_GCF_000442435.1_ASM44243v1	100.00	0.0	0.0407825240629402	-	aminodeoxychorismate synthase, component I
RL_RS20995	Rhizobium_leguminosarum_GCF_000009265.1_ASM926v1	91.10	0.0	0.0433681885070594	-	aminodeoxychorismate synthase, component I
NGR_c28430	Sinorhizobium_fredii_GCF_000018545.1_ASM1854v1	74.54	0.0	0.0338207395116074	-	aminodeoxychorismate synthase
SMc04013	Sinorhizobium_meliloti_GCF_000006965.1_ASM696v1	74.80	0.0	0.0327560519447585	pabB	aminodeoxychorismate synthase
AZC_RS08285	Azorhizobium_caulinodans_GCF_000010525.1_ASM1052v1	41.41	1e-49	0.0707387986085873	-	aminodeoxychorismate synthase component I
/home/htaboada/sp27/red_etli/bin/footprint_discovery_enero_2018/etli_23_Feb_2018/Rhizobiales/Rhizobium_etli_GCF_000092045.1_ASM9204v1/RHE_RS16330/RHE_RS16330_Rhizobium_etli_GCF_000092045.1_ASM9204v1_Rhizobiales_taxfreq_ortho_bbh.tab
RHE_RS16330	Rhizobium_etli_GCF_000092045.1_ASM9204v1	100.00	0.0	0.0398446060364578	-	NAD(P)-dependent oxidoreductase
REMIM1_RS16085	Rhizobium_etli_GCF_000442435.1_ASM44243v1	100.00	0.0	0.0387809277899125	-	NAD(P)-dependent oxidoreductase
RL_RS19805	Rhizobium_leguminosarum_GCF_000009265.1_ASM926v1	80.37	0.0	0.0281707891156967	-	NAD(P)-dependent oxidoreductase
NGR_b15670	Sinorhizobium_fredii_GCF_000018545.1_ASM1854v1	82.21	0.0	0.0264224527434433	-	UDP-glucose 4-epimerase (plasmid)
/home/htaboada/sp27/red_etli/bin/footprint_discovery_enero_2018/etli_23_Feb_2018/Rhizobiales/Rhizobium_etli_GCF_000092045.1_ASM9204v1/RHE_RS13850/RHE_RS13850_Rhizobium_etli_GCF_000092045.1_ASM9204v1_Rhizobiales_taxfreq_ortho_bbh.tab
RHE_RS13850	Rhizobium_etli_GCF_000092045.1_ASM9204v1	100.00	8e-143	0.0398446060364578	-	hypothetical protein
REMIM1_RS13690	Rhizobium_etli_GCF_000442435.1_ASM44243v1	100.00	9e-143	0.0340271366414716	-	hypothetical protein
/home/htaboada/sp27/red_etli/bin/footprint_discovery_enero_2018/etli_23_Feb_2018/Rhizobiales/Rhizobium_etli_GCF_000092045.1_ASM9204v1/RHE_RS12355/RHE_RS12355_Rhizobium_etli_GCF_000092045.1_ASM9204v1_Rhizobiales_taxfreq_ortho_bbh.tab
MAFF_RS03300	Mesorhizobium_loti_GCF_000009625.1_ASM962v1	57.45	2e-89	0.0225049875918447	-	ABC transporter permease
RHE_RS12355	Rhizobium_etli_GCF_000092045.1_ASM9204v1	100.00	0.0	0.0398446060364578	-	MULTISPECIES: ABC transporter permease
REMIM1_RS12190	Rhizobium_etli_GCF_000442435.1_ASM44243v1	99.25	0.0	0.0345275357097285	-	amino acid ABC transporter permease
RL_RS14215	Rhizobium_leguminosarum_GCF_000009265.1_ASM926v1	94.78	0.0	0.0329894767275922	-	ABC transporter permease
NGR_c17190	Sinorhizobium_fredii_GCF_000018545.1_ASM1854v1	66.79	6e-130	0.0465035168284601	-	amino acid ABC transporter permease
SMc00139	Sinorhizobium_meliloti_GCF_000006965.1_ASM696v1	69.40	8e-135	0.0359259924555416	-	amino acid ABC transporter permease
/home/htaboada/sp27/red_etli/bin/footprint_discovery_enero_2018/etli_23_Feb_2018/Rhizobiales/Rhizobium_etli_GCF_000092045.1_ASM9204v1/RHE_RS07510/RHE_RS07510_Rhizobium_etli_GCF_000092045.1_ASM9204v1_Rhizobiales_taxfreq_ortho_bbh.tab
AAV28_RS17115	Bradyrhizobium_diazoefficiens_GCF_001642675.1_ASM164267v1	72.14	2e-71	0.0184360602314867	-	MULTISPECIES: nucleoside-diphosphate kinase
BBTA_RS17990	Bradyrhizobium_sp._BTAi1_GCF_000015165.1_ASM1516v1	74.29	2e-68	0.0305485427254101	-	nucleoside-diphosphate kinase
MAFF_RS32185	Mesorhizobium_loti_GCF_000009625.1_ASM962v1	91.43	3e-96	0.0220994923199196	-	MULTISPECIES: nucleoside-diphosphate kinase
RHE_RS07510	Rhizobium_etli_GCF_000092045.1_ASM9204v1	100.00	8e-103	0.0398446060364578	-	MULTISPECIES: nucleoside-diphosphate kinase
REMIM1_RS07685	Rhizobium_etli_GCF_000442435.1_ASM44243v1	99.29	1e-101	0.0362789324486278	-	nucleoside-diphosphate kinase
RL_RS08190	Rhizobium_leguminosarum_GCF_000009265.1_ASM926v1	98.57	2e-101	0.0363254912281352	-	MULTISPECIES: nucleoside-diphosphate kinase
NGR_c09130	Sinorhizobium_fredii_GCF_000018545.1_ASM1854v1	90.71	5e-93	0.0203452886124513	ndk	nucleoside diphosphate kinase
SMc00595	Sinorhizobium_meliloti_GCF_000006965.1_ASM696v1	93.57	2e-95	0.0224537452847135	ndk	nucleoside diphosphate kinase
AZC_RS21310	Azorhizobium_caulinodans_GCF_000010525.1_ASM1052v1	68.57	2e-67	0.0648979803748507	-	nucleoside-diphosphate kinase
/home/htaboada/sp27/red_etli/bin/footprint_discovery_enero_2018/etli_23_Feb_2018/Rhizobiales/Rhizobium_etli_GCF_000092045.1_ASM9204v1/RHE_RS06620/RHE_RS06620_Rhizobium_etli_GCF_000092045.1_ASM9204v1_Rhizobiales_taxfreq_ortho_bbh.tab
AAV28_RS12170	Bradyrhizobium_diazoefficiens_GCF_001642675.1_ASM164267v1	76.23	1e-123	0.0393302618271716	-	MULTISPECIES: DNA-binding response regulator
BBTA_RS14385	Bradyrhizobium_sp._BTAi1_GCF_000015165.1_ASM1516v1	76.23	4e-122	0.0421133481857439	-	MULTISPECIES: DNA-binding response regulator
MAFF_RS31360	Mesorhizobium_loti_GCF_000009625.1_ASM962v1	76.13	7e-121	0.0411577701004006	-	DNA-binding response regulator
RHE_RS06620	Rhizobium_etli_GCF_000092045.1_ASM9204v1	100.00	0.0	0.0398446060364578	-	DNA-binding response regulator
REMIM1_RS06795	Rhizobium_etli_GCF_000442435.1_ASM44243v1	100.00	0.0	0.0352781343121139	-	DNA-binding response regulator
RL_RS07485	Rhizobium_leguminosarum_GCF_000009265.1_ASM926v1	96.77	5e-178	0.0326188084497541	-	MULTISPECIES: DNA-binding response regulator
NGR_c07840	Sinorhizobium_fredii_GCF_000018545.1_ASM1854v1	89.87	6e-153	0.0449181696638536	-	two-component response regulator transcriptional regulatory protein
SMc02366	Sinorhizobium_meliloti_GCF_000006965.1_ASM696v1	90.75	4e-153	0.0385676095478608	-	transcriptional regulator
AZC_RS05835	Azorhizobium_caulinodans_GCF_000010525.1_ASM1052v1	75.23	8e-122	0.0966979907585276	-	DNA-binding response regulator
/home/htaboada/sp27/red_etli/bin/footprint_discovery_enero_2018/etli_23_Feb_2018/Rhizobiales/Rhizobium_etli_GCF_000092045.1_ASM9204v1/RHE_RS24980/RHE_RS24980_Rhizobium_etli_GCF_000092045.1_ASM9204v1_Rhizobiales_taxfreq_ortho_bbh.tab
MAFF_RS20155	Mesorhizobium_loti_GCF_000009625.1_ASM962v1	52.72	4e-110	0.0261544450391708	-	AraC family transcriptional regulator
RHE_RS24980	Rhizobium_etli_GCF_000092045.1_ASM9204v1	100.00	0.0	0.039560001707626	-	AraC family transcriptional regulator
REMIM1_RS25185	Rhizobium_etli_GCF_000442435.1_ASM44243v1	98.70	0.0	0.0250199534128467	-	AraC family transcriptional regulator
RL_RS29735	Rhizobium_leguminosarum_GCF_000009265.1_ASM926v1	35.13	5e-53	0.0285414573935348	-	AraC family transcriptional regulator
/home/htaboada/sp27/red_etli/bin/footprint_discovery_enero_2018/etli_23_Feb_2018/Rhizobiales/Rhizobium_etli_GCF_000092045.1_ASM9204v1/RHE_RS23365/RHE_RS23365_Rhizobium_etli_GCF_000092045.1_ASM9204v1_Rhizobiales_taxfreq_ortho_bbh.tab
BBTA_RS36570	Bradyrhizobium_sp._BTAi1_GCF_000015165.1_ASM1516v1	30.44	9e-52
MAFF_RS34480	Mesorhizobium_loti_GCF_000009625.1_ASM962v1	68.87	0.0	0.0316286312101601	-	sugar ABC transporter substrate-binding protein
RHE_RS23365	Rhizobium_etli_GCF_000092045.1_ASM9204v1	100.00	0.0	0.039560001707626	-	sugar ABC transporter substrate-binding protein
REMIM1_RS22395	Rhizobium_etli_GCF_000442435.1_ASM44243v1	100.00	0.0	0.0337769371073431	-	sugar ABC transporter substrate-binding protein
RL_RS14195	Rhizobium_leguminosarum_GCF_000009265.1_ASM926v1	30.49	1e-51	0.0392908374508401	-	ABC transporter substrate-binding protein
NGR_b12930	Sinorhizobium_fredii_GCF_000018545.1_ASM1854v1	29.24	2e-50	0.0335565149841729	-	sugar ABC transporter substrate-binding protein (plasmid)
/home/htaboada/sp27/red_etli/bin/footprint_discovery_enero_2018/etli_23_Feb_2018/Rhizobiales/Rhizobium_etli_GCF_000092045.1_ASM9204v1/RHE_RS21035/RHE_RS21035_Rhizobium_etli_GCF_000092045.1_ASM9204v1_Rhizobiales_taxfreq_ortho_bbh.tab
AAV28_RS03415	Bradyrhizobium_diazoefficiens_GCF_001642675.1_ASM164267v1	64.29	0.0	0.0454756152376672	prpE	MULTISPECIES: propionyl-CoA synthetase
BBTA_RS04450	Bradyrhizobium_sp._BTAi1_GCF_000015165.1_ASM1516v1	65.39	0.0	0.0229114070440575	prpE	propionyl-CoA synthetase
MAFF_RS21655	Mesorhizobium_loti_GCF_000009625.1_ASM962v1	66.40	0.0	0.0474429468152401	prpE	propionyl-CoA synthetase
RHE_RS21035	Rhizobium_etli_GCF_000092045.1_ASM9204v1	100.00	0.0	0.039560001707626	prpE	propionyl-CoA synthetase
REMIM1_RS20910	Rhizobium_etli_GCF_000442435.1_ASM44243v1	99.69	0.0	0.0360287329144993	prpE	propionyl-CoA synthetase
RL_RS24335	Rhizobium_leguminosarum_GCF_000009265.1_ASM926v1	89.47	0.0	0.0407735105621926	prpE	propionyl-CoA synthetase
NGR_c33370	Sinorhizobium_fredii_GCF_000018545.1_ASM1854v1	69.87	0.0	0.0398979036425993	-	AMP-dependent synthetase and ligase
SMc04095	Sinorhizobium_meliloti_GCF_000006965.1_ASM696v1	68.30	0.0	0.0456999756971228	-	acyl-COA synthetase
AZC_RS07605	Azorhizobium_caulinodans_GCF_000010525.1_ASM1052v1	66.61	0.0
/home/htaboada/sp27/red_etli/bin/footprint_discovery_enero_2018/etli_23_Feb_2018/Rhizobiales/Rhizobium_etli_GCF_000092045.1_ASM9204v1/RHE_RS17050/RHE_RS17050_Rhizobium_etli_GCF_000092045.1_ASM9204v1_Rhizobiales_taxfreq_ortho_bbh.tab
AAV28_RS07385	Bradyrhizobium_diazoefficiens_GCF_001642675.1_ASM164267v1	92.41	5e-136	0.0208942015956849	-	MULTISPECIES: DNA-binding response regulator
BBTA_RS30630	Bradyrhizobium_sp._BTAi1_GCF_000015165.1_ASM1516v1	92.41	5e-137
MAFF_RS12105	Mesorhizobium_loti_GCF_000009625.1_ASM962v1	96.44	3e-142	0.0332506122978606	-	MULTISPECIES: DNA-binding response regulator
RHE_RS17050	Rhizobium_etli_GCF_000092045.1_ASM9204v1	100.00	4e-154	0.039560001707626	-	MULTISPECIES: DNA-binding response regulator
REMIM1_RS16815	Rhizobium_etli_GCF_000442435.1_ASM44243v1	100.00	4e-154	0.0357785333803708	-	MULTISPECIES: DNA-binding response regulator
RL_RS19380	Rhizobium_leguminosarum_GCF_000009265.1_ASM926v1	99.57	2e-153	0.0278001208378586	-	MULTISPECIES: DNA-binding response regulator
NGR_c27580	Sinorhizobium_fredii_GCF_000018545.1_ASM1854v1	97.85	7e-151	0.0322353923470008	-	two component response regulator
SMc00654	Sinorhizobium_meliloti_GCF_000006965.1_ASM696v1	97.85	2e-150	0.0290577880155116	ctrA	response regulator,controls chromosomal replication initiation protein
AZC_RS06180	Azorhizobium_caulinodans_GCF_000010525.1_ASM1052v1	90.75	1e-137	0.0661959399823478	-	DNA-binding response regulator
/home/htaboada/sp27/red_etli/bin/footprint_discovery_enero_2018/etli_23_Feb_2018/Rhizobiales/Rhizobium_etli_GCF_000092045.1_ASM9204v1/RHE_RS11210/RHE_RS11210_Rhizobium_etli_GCF_000092045.1_ASM9204v1_Rhizobiales_taxfreq_ortho_bbh.tab
AAV28_RS24460	Bradyrhizobium_diazoefficiens_GCF_001642675.1_ASM164267v1	41.53	5e-51	0.0340628160467468	-	MULTISPECIES: DUF2336 domain-containing protein
BBTA_RS24245	Bradyrhizobium_sp._BTAi1_GCF_000015165.1_ASM1516v1	40.86	9e-52	0.0464774257179453	-	DUF2336 domain-containing protein
MAFF_RS04735	Mesorhizobium_loti_GCF_000009625.1_ASM962v1	41.56	2e-58	0.0324396217540103	-	DUF2336 domain-containing protein
RHE_RS11210	Rhizobium_etli_GCF_000092045.1_ASM9204v1	100.00	0.0	0.039560001707626	-	DUF2336 domain-containing protein
REMIM1_RS11055	Rhizobium_etli_GCF_000442435.1_ASM44243v1	99.73	0.0	0.0362789324486278	-	DUF2336 domain-containing protein
RL_RS13005	Rhizobium_leguminosarum_GCF_000009265.1_ASM926v1	92.53	0.0	0.0363254912281352	-	DUF2336 domain-containing protein
NGR_c12670	Sinorhizobium_fredii_GCF_000018545.1_ASM1854v1	52.53	6e-115	0.0317069432921319	-	hypothetical protein NGR_c12670
SMc01015	Sinorhizobium_meliloti_GCF_000006965.1_ASM696v1	51.60	6e-90	0.0280011411785839	-	hypothetical protein SMc01015
/home/htaboada/sp27/red_etli/bin/footprint_discovery_enero_2018/etli_23_Feb_2018/Rhizobiales/Rhizobium_etli_GCF_000092045.1_ASM9204v1/RHE_RS07795/RHE_RS07795_Rhizobium_etli_GCF_000092045.1_ASM9204v1_Rhizobiales_taxfreq_ortho_bbh.tab
AAV28_RS21915	Bradyrhizobium_diazoefficiens_GCF_001642675.1_ASM164267v1	73.48	0.0	0.0245814136419822	hppA	MULTISPECIES: K+-insensitive pyrophosphate-energized proton pump
BBTA_RS21730	Bradyrhizobium_sp._BTAi1_GCF_000015165.1_ASM1516v1	73.55	0.0	0.0312031543552403	hppA	sodium-translocating pyrophosphatase
MAFF_RS34195	Mesorhizobium_loti_GCF_000009625.1_ASM962v1	86.31	0.0	0.0220994923199196	hppA	K+-insensitive pyrophosphate-energized proton pump
RHE_RS07795	Rhizobium_etli_GCF_000092045.1_ASM9204v1	100.00	0.0	0.039560001707626	hppA	sodium-translocating pyrophosphatase
REMIM1_RS07970	Rhizobium_etli_GCF_000442435.1_ASM44243v1	99.71	0.0	0.0400319254605548	hppA	sodium-translocating pyrophosphatase
RL_RS08470	Rhizobium_leguminosarum_GCF_000009265.1_ASM926v1	94.86	0.0	0.0270587842821823	hppA	sodium-translocating pyrophosphatase
NGR_c09670	Sinorhizobium_fredii_GCF_000018545.1_ASM1854v1	89.44	0.0	0.0422759243895092	hppA	membrane-bound proton-translocating pyrophosphatase
SMc01780	Sinorhizobium_meliloti_GCF_000006965.1_ASM696v1	89.59	0.0	0.0330202136539904	hppA	membrane-bound proton-translocating pyrophosphatase
AZC_RS15835	Azorhizobium_caulinodans_GCF_000010525.1_ASM1052v1	72.24	0.0
/home/htaboada/sp27/red_etli/bin/footprint_discovery_enero_2018/etli_23_Feb_2018/Rhizobiales/Rhizobium_etli_GCF_000092045.1_ASM9204v1/RHE_RS05960/RHE_RS05960_Rhizobium_etli_GCF_000092045.1_ASM9204v1_Rhizobiales_taxfreq_ortho_bbh.tab
AAV28_RS02590	Bradyrhizobium_diazoefficiens_GCF_001642675.1_ASM164267v1	62.57	5e-149	0.0277418811102371	-	MULTISPECIES: DNA ligase-associated DEXH box helicase
BBTA_RS03740	Bradyrhizobium_sp._BTAi1_GCF_000015165.1_ASM1516v1	62.76	5e-150	0.0294575233423597	-	DNA ligase-associated DEXH box helicase
MAFF_RS22485	Mesorhizobium_loti_GCF_000009625.1_ASM962v1	70.24	1e-178	0.0293984072145719	-	DNA ligase-associated DEXH box helicase
RHE_RS05960	Rhizobium_etli_GCF_000092045.1_ASM9204v1	100.00	0.0	0.039560001707626	-	DNA ligase-associated DEXH box helicase
REMIM1_RS06200	Rhizobium_etli_GCF_000442435.1_ASM44243v1	100.00	0.0	0.0370295310510132	-	DNA ligase-associated DEXH box helicase
RL_RS06740	Rhizobium_leguminosarum_GCF_000009265.1_ASM926v1	94.64	0.0	0.0214987601146106	-	DNA ligase-associated DEXH box helicase
NGR_c29650	Sinorhizobium_fredii_GCF_000018545.1_ASM1854v1	73.51	0.0	0.0393694545877305	-	mRNA processing exonuclease
SMc03176	Sinorhizobium_meliloti_GCF_000006965.1_ASM696v1	72.32	0.0	0.0153213791354516	-	hypothetical protein SMc03176
AZC_RS02015	Azorhizobium_caulinodans_GCF_000010525.1_ASM1052v1	58.91	1e-142	0.0454285862623955	-	DNA ligase-associated DEXH box helicase
/home/htaboada/sp27/red_etli/bin/footprint_discovery_enero_2018/etli_23_Feb_2018/Rhizobiales/Rhizobium_etli_GCF_000092045.1_ASM9204v1/RHE_RS02800/RHE_RS02800_Rhizobium_etli_GCF_000092045.1_ASM9204v1_Rhizobiales_taxfreq_ortho_bbh.tab
AAV28_RS02635	Bradyrhizobium_diazoefficiens_GCF_001642675.1_ASM164267v1	57.20	5e-72	0.0326581638386336	-	MULTISPECIES: sulfite exporter TauE
BBTA_RS03780	Bradyrhizobium_sp._BTAi1_GCF_000015165.1_ASM1516v1	54.82	4e-82	0.0285847078359194	-	sulfite exporter TauE
MAFF_RS23005	Mesorhizobium_loti_GCF_000009625.1_ASM962v1	69.37	1e-116	0.0198692683243313	-	sulfite exporter TauE
RHE_RS02800	Rhizobium_etli_GCF_000092045.1_ASM9204v1	100.00	9e-173	0.039560001707626	-	sulfite exporter TauE/SafE family protein
REMIM1_RS03200	Rhizobium_etli_GCF_000442435.1_ASM44243v1	100.00	1e-172	0.034777735243857	-	sulfite exporter TauE/SafE family protein
RL_RS03080	Rhizobium_leguminosarum_GCF_000009265.1_ASM926v1	96.74	1e-168	0.0233521015038012	-	sulfite exporter TauE
NGR_c01710	Sinorhizobium_fredii_GCF_000018545.1_ASM1854v1	82.78	4e-142	0.0298573716000909	-	transmembrane protein
SMc02232	Sinorhizobium_meliloti_GCF_000006965.1_ASM696v1	81.46	6e-140	0.0232462304124093	-	hypothetical protein SMc02232
AZC_RS07915	Azorhizobium_caulinodans_GCF_000010525.1_ASM1052v1	54.15	5e-65
/home/htaboada/sp27/red_etli/bin/footprint_discovery_enero_2018/etli_23_Feb_2018/Rhizobiales/Rhizobium_etli_GCF_000092045.1_ASM9204v1/RHE_RS02775/RHE_RS02775_Rhizobium_etli_GCF_000092045.1_ASM9204v1_Rhizobiales_taxfreq_ortho_bbh.tab
AAV28_RS02605	Bradyrhizobium_diazoefficiens_GCF_001642675.1_ASM164267v1	60.67	0.0	0.0479337566018654	-	DNA ligase-associated DEXH box helicase
BBTA_RS03755	Bradyrhizobium_sp._BTAi1_GCF_000015165.1_ASM1516v1	61.15	0.0	0.045604610211505	-	DNA ligase-associated DEXH box helicase
MAFF_RS22965	Mesorhizobium_loti_GCF_000009625.1_ASM962v1	73.52	0.0	0.043793489367914	-	DNA ligase-associated DEXH box helicase
RHE_RS02775	Rhizobium_etli_GCF_000092045.1_ASM9204v1	100.00	0.0	0.039560001707626	-	DNA ligase-associated DEXH box helicase
REMIM1_RS03175	Rhizobium_etli_GCF_000442435.1_ASM44243v1	99.63	0.0	0.0302741436295446	-	DNA ligase-associated DEXH box helicase
RL_RS03055	Rhizobium_leguminosarum_GCF_000009265.1_ASM926v1	95.10	0.0	0.0192747504475819	-	DNA ligase-associated DEXH box helicase
NGR_c01750	Sinorhizobium_fredii_GCF_000018545.1_ASM1854v1	82.93	0.0
SMc02237	Sinorhizobium_meliloti_GCF_000006965.1_ASM696v1	82.80	0.0	0.0237745538308731	-	ATP-dependent helicase
AZC_RS00545	Azorhizobium_caulinodans_GCF_000010525.1_ASM1052v1	65.35	0.0	0.0902081927210425	-	DNA ligase-associated DEXH box helicase
/home/htaboada/sp27/red_etli/bin/footprint_discovery_enero_2018/etli_23_Feb_2018/Rhizobiales/Rhizobium_etli_GCF_000092045.1_ASM9204v1/RHE_RS01755/RHE_RS01755_Rhizobium_etli_GCF_000092045.1_ASM9204v1_Rhizobiales_taxfreq_ortho_bbh.tab
AAV28_RS28130	Bradyrhizobium_diazoefficiens_GCF_001642675.1_ASM164267v1	50.65	0.0
BBTA_RS30220	Bradyrhizobium_sp._BTAi1_GCF_000015165.1_ASM1516v1	50.76	0.0
RHE_RS01755	Rhizobium_etli_GCF_000092045.1_ASM9204v1	100.00	0.0	0.039560001707626	-	urocanate hydratase
REMIM1_RS02170	Rhizobium_etli_GCF_000442435.1_ASM44243v1	99.10	0.0	0.0467873128820234	-	urocanate hydratase
RL_RS01900	Rhizobium_leguminosarum_GCF_000009265.1_ASM926v1	96.01	0.0
/home/htaboada/sp27/red_etli/bin/footprint_discovery_enero_2018/etli_23_Feb_2018/Rhizobiales/Rhizobium_etli_GCF_000092045.1_ASM9204v1/RHE_RS01160/RHE_RS01160_Rhizobium_etli_GCF_000092045.1_ASM9204v1_Rhizobiales_taxfreq_ortho_bbh.tab
AAV28_RS34930	Bradyrhizobium_diazoefficiens_GCF_001642675.1_ASM164267v1	29.95	2e-49	0.0307267670524778	-	MULTISPECIES: hypothetical protein
MAFF_RS26585	Mesorhizobium_loti_GCF_000009625.1_ASM962v1	30.28	1e-52	0.0293984072145719	-	succinoglycan biosynthesis protein exop
RHE_RS01160	Rhizobium_etli_GCF_000092045.1_ASM9204v1	100.00	0.0	0.039560001707626	-	sugar transporter
REMIM1_RS01590	Rhizobium_etli_GCF_000442435.1_ASM44243v1	99.81	0.0	0.0370295310510132	-	LPS biosynthesis protein
RL_RS01245	Rhizobium_leguminosarum_GCF_000009265.1_ASM926v1	86.01	0.0	0.0396615057286782	-	sugar transporter
NGR_b19100	Sinorhizobium_fredii_GCF_000018545.1_ASM1854v1	31.51	7e-47	0.0319711678195664	-	polysaccharide transporter (plasmid)
SM_b21506	Sinorhizobium_meliloti_GCF_000006965.1_ASM696v1	31.00	8e-46	0.0330202136539904	-	cell surface polysaccharides export protein (plasmid)
/home/htaboada/sp27/red_etli/bin/footprint_discovery_enero_2018/etli_23_Feb_2018/Rhizobiales/Rhizobium_etli_GCF_000092045.1_ASM9204v1/RHE_RS01020/RHE_RS01020_Rhizobium_etli_GCF_000092045.1_ASM9204v1_Rhizobiales_taxfreq_ortho_bbh.tab
AAV28_RS04150	Bradyrhizobium_diazoefficiens_GCF_001642675.1_ASM164267v1	36.56	4e-17	0.0219476907517699	-	MULTISPECIES: hypothetical protein
BBTA_RS32905	Bradyrhizobium_sp._BTAi1_GCF_000015165.1_ASM1516v1	36.56	1e-17
MAFF_RS22895	Mesorhizobium_loti_GCF_000009625.1_ASM962v1	48.39	1e-30	0.0269654355830211	-	hypothetical protein
RHE_RS01020	Rhizobium_etli_GCF_000092045.1_ASM9204v1	100.00	2e-75	0.039560001707626	-	membrane protein
REMIM1_RS01460	Rhizobium_etli_GCF_000442435.1_ASM44243v1	99.26	2e-74	0.0322757399025723	-	MULTISPECIES: pilus formation domain-containing protein
RL_RS01110	Rhizobium_leguminosarum_GCF_000009265.1_ASM926v1	93.38	6e-71	0.0240934380594774	-	membrane protein
NGR_c34630	Sinorhizobium_fredii_GCF_000018545.1_ASM1854v1	81.19	4e-61	0.0335565149841729	pilQ1	type IV pilus protein PilQ1
SMc04115	Sinorhizobium_meliloti_GCF_000006965.1_ASM696v1	84.31	6e-62	0.0258878475047285	-	hypothetical protein SMc04115
/home/htaboada/sp27/red_etli/bin/footprint_discovery_enero_2018/etli_23_Feb_2018/Rhizobiales/Rhizobium_etli_GCF_000092045.1_ASM9204v1/RHE_RS00775/RHE_RS00775_Rhizobium_etli_GCF_000092045.1_ASM9204v1_Rhizobiales_taxfreq_ortho_bbh.tab
AAV28_RS41595	Bradyrhizobium_diazoefficiens_GCF_001642675.1_ASM164267v1	72.75	0.0
BBTA_RS00630	Bradyrhizobium_sp._BTAi1_GCF_000015165.1_ASM1516v1	70.95	0.0
MAFF_RS16980	Mesorhizobium_loti_GCF_000009625.1_ASM962v1	86.85	0.0	0.0399412842846252	-	DNA translocase FtsK
RHE_RS00775	Rhizobium_etli_GCF_000092045.1_ASM9204v1	100.00	0.0	0.039560001707626	-	DNA translocase FtsK
REMIM1_RS01215	Rhizobium_etli_GCF_000442435.1_ASM44243v1	99.35	0.0	0.0387809277899125	-	DNA translocase FtsK
RL_RS00855	Rhizobium_leguminosarum_GCF_000009265.1_ASM926v1	85.22	0.0	0.0381788326173258	-	DNA translocase FtsK
NGR_b21580	Sinorhizobium_fredii_GCF_000018545.1_ASM1854v1	90.28	0.0	0.0110974301522462	ftsK1	DNA segregation ATPase FtsK
SM_b20595	Sinorhizobium_meliloti_GCF_000006965.1_ASM696v1	89.68	0.0
AZC_RS00480	Azorhizobium_caulinodans_GCF_000010525.1_ASM1052v1	76.55	0.0
/home/htaboada/sp27/red_etli/bin/footprint_discovery_enero_2018/etli_23_Feb_2018/Rhizobiales/Rhizobium_etli_GCF_000092045.1_ASM9204v1/RHE_RS25845/RHE_RS25845_Rhizobium_etli_GCF_000092045.1_ASM9204v1_Rhizobiales_taxfreq_ortho_bbh.tab
RHE_RS25845	Rhizobium_etli_GCF_000092045.1_ASM9204v1	100.00	0.0	0.0392753973787941	-	amino acid permease
REMIM1_RS26090	Rhizobium_etli_GCF_000442435.1_ASM44243v1	100.00	0.0	0.0402821249946833	-	amino acid permease
NGR_b23020	Sinorhizobium_fredii_GCF_000018545.1_ASM1854v1	57.61	8e-134	0.0475604149381979	-	L-asparagine permease (plasmid)
AZC_RS10330	Azorhizobium_caulinodans_GCF_000010525.1_ASM1052v1	58.24	7e-133	0.102538808992264	-	L-asparagine permease
/home/htaboada/sp27/red_etli/bin/footprint_discovery_enero_2018/etli_23_Feb_2018/Rhizobiales/Rhizobium_etli_GCF_000092045.1_ASM9204v1/RHE_RS19730/RHE_RS19730_Rhizobium_etli_GCF_000092045.1_ASM9204v1_Rhizobiales_taxfreq_ortho_bbh.tab
AAV28_RS12195	Bradyrhizobium_diazoefficiens_GCF_001642675.1_ASM164267v1	83.52	0.0
BBTA_RS14440	Bradyrhizobium_sp._BTAi1_GCF_000015165.1_ASM1516v1	82.59	0.0	0.0178927178820259	-	formate dehydrogenase subunit alpha
MAFF_RS22090	Mesorhizobium_loti_GCF_000009625.1_ASM962v1	78.92	0.0
RHE_RS19730	Rhizobium_etli_GCF_000092045.1_ASM9204v1	100.00	0.0	0.0392753973787941	-	formate dehydrogenase subunit alpha
REMIM1_RS19495	Rhizobium_etli_GCF_000442435.1_ASM44243v1	99.69	0.0	0.0362789324486278	-	formate dehydrogenase subunit alpha
RL_RS22650	Rhizobium_leguminosarum_GCF_000009265.1_ASM926v1	96.14	0.0	0.0181627456140676	-	formate dehydrogenase subunit alpha
NGR_c30880	Sinorhizobium_fredii_GCF_000018545.1_ASM1854v1	89.36	0.0	0.0623569884745261	fdsA	NAD-dependent formate dehydrogenase subunit alpha
SMc04444	Sinorhizobium_meliloti_GCF_000006965.1_ASM696v1	89.78	0.0	0.0575872526125593	fdsA	NAD-dependent formate dehydrogenase subunit alpha protein
AZC_RS17765	Azorhizobium_caulinodans_GCF_000010525.1_ASM1052v1	78.52	0.0
/home/htaboada/sp27/red_etli/bin/footprint_discovery_enero_2018/etli_23_Feb_2018/Rhizobiales/Rhizobium_etli_GCF_000092045.1_ASM9204v1/RHE_RS19440/RHE_RS19440_Rhizobium_etli_GCF_000092045.1_ASM9204v1_Rhizobiales_taxfreq_ortho_bbh.tab
AAV28_RS03845	Bradyrhizobium_diazoefficiens_GCF_001642675.1_ASM164267v1	69.41	2e-103	0.0393302618271716	-	MULTISPECIES: cell division ATP-binding protein FtsE
BBTA_RS05560	Bradyrhizobium_sp._BTAi1_GCF_000015165.1_ASM1516v1	72.15	3e-99	0.0543327652759079	ftsE	cell division ATP-binding protein FtsE
MAFF_RS14880	Mesorhizobium_loti_GCF_000009625.1_ASM962v1	81.74	9e-116	0.0373055650171119	-	MULTISPECIES: cell division ATP-binding protein FtsE
RHE_RS19440	Rhizobium_etli_GCF_000092045.1_ASM9204v1	100.00	6e-138	0.0392753973787941	ftsE	cell division ATP-binding protein FtsE
REMIM1_RS19210	Rhizobium_etli_GCF_000442435.1_ASM44243v1	100.00	7e-138	0.0360287329144993	-	cell division ATP-binding protein FtsE
RL_RS22330	Rhizobium_leguminosarum_GCF_000009265.1_ASM926v1	98.63	1e-136	0.0418855153957069	-	MULTISPECIES: cell division ATP-binding protein FtsE
NGR_c27010	Sinorhizobium_fredii_GCF_000018545.1_ASM1854v1	89.04	9e-120	0.0472961904107635	ftsE	cell division ATP-binding protein FtsE
SMc00717	Sinorhizobium_meliloti_GCF_000006965.1_ASM696v1	89.04	1e-119	0.0364543158740054	-	ABC transporter ATP-binding protein
AZC_RS23620	Azorhizobium_caulinodans_GCF_000010525.1_ASM1052v1	72.15	7e-106	0.0337469497949224	-	cell division ATP-binding protein FtsE
/home/htaboada/sp27/red_etli/bin/footprint_discovery_enero_2018/etli_23_Feb_2018/Rhizobiales/Rhizobium_etli_GCF_000092045.1_ASM9204v1/RHE_RS14640/RHE_RS14640_Rhizobium_etli_GCF_000092045.1_ASM9204v1_Rhizobiales_taxfreq_ortho_bbh.tab
AAV28_RS33830	Bradyrhizobium_diazoefficiens_GCF_001642675.1_ASM164267v1	37.91	2e-28	0.022123272277784	-	MULTISPECIES: LysE family translocator
BBTA_RS31760	Bradyrhizobium_sp._BTAi1_GCF_000015165.1_ASM1516v1	38.46	6e-31
MAFF_RS20610	Mesorhizobium_loti_GCF_000009625.1_ASM962v1	56.02	2e-60	0.0259516974032083	-	LysE family translocator
RHE_RS14640	Rhizobium_etli_GCF_000092045.1_ASM9204v1	100.00	6e-138	0.0392753973787941	-	LysE family translocator
REMIM1_RS14480	Rhizobium_etli_GCF_000442435.1_ASM44243v1	98.96	1e-136	0.03102474223193	-	LysE family translocator
RL_RS17110	Rhizobium_leguminosarum_GCF_000009265.1_ASM926v1	92.75	2e-130	0.0359548229502971	-	LysE family translocator
NGR_c21230	Sinorhizobium_fredii_GCF_000018545.1_ASM1854v1	63.73	1e-75	0.0211379621947546	-	transmembrane efflux protein
SMc01851	Sinorhizobium_meliloti_GCF_000006965.1_ASM696v1	67.37	7e-83	0.020868775029322	-	amino acid efflux protein
AZC_RS11720	Azorhizobium_caulinodans_GCF_000010525.1_ASM1052v1	63.21	1e-66
/home/htaboada/sp27/red_etli/bin/footprint_discovery_enero_2018/etli_23_Feb_2018/Rhizobiales/Rhizobium_etli_GCF_000092045.1_ASM9204v1/RHE_RS12975/RHE_RS12975_Rhizobium_etli_GCF_000092045.1_ASM9204v1_Rhizobiales_taxfreq_ortho_bbh.tab
AAV28_RS03460	Bradyrhizobium_diazoefficiens_GCF_001642675.1_ASM164267v1	39.31	3e-29
MAFF_RS04265	Mesorhizobium_loti_GCF_000009625.1_ASM962v1	49.70	5e-38
RHE_RS12975	Rhizobium_etli_GCF_000092045.1_ASM9204v1	100.00	3e-120	0.0392753973787941	-	DUF924 domain-containing protein
REMIM1_RS12810	Rhizobium_etli_GCF_000442435.1_ASM44243v1	100.00	3e-120	0.0380303291875271	-	DUF924 domain-containing protein
RL_RS14960	Rhizobium_leguminosarum_GCF_000009265.1_ASM926v1	84.15	9e-97	0.0315068036162397	-	DUF924 domain-containing protein
NGR_c18740	Sinorhizobium_fredii_GCF_000018545.1_ASM1854v1	58.79	1e-61	0.0576009469807063	-	transmembrane protein
SMc04178	Sinorhizobium_meliloti_GCF_000006965.1_ASM696v1	57.78	1e-58
/home/htaboada/sp27/red_etli/bin/footprint_discovery_enero_2018/etli_23_Feb_2018/Rhizobiales/Rhizobium_etli_GCF_000092045.1_ASM9204v1/RHE_RS11950/RHE_RS11950_Rhizobium_etli_GCF_000092045.1_ASM9204v1_Rhizobiales_taxfreq_ortho_bbh.tab
AAV28_RS26350	Bradyrhizobium_diazoefficiens_GCF_001642675.1_ASM164267v1	49.15	1e-10	0.0305511855264636	-	MULTISPECIES: histidine kinase
BBTA_RS25935	Bradyrhizobium_sp._BTAi1_GCF_000015165.1_ASM1516v1	42.25	2e-08	0.0447317947050647	-	Hpt domain-containing protein
MAFF_RS04305	Mesorhizobium_loti_GCF_000009625.1_ASM962v1	44.44	5e-14	0.0350753410215237	-	histidine kinase
RHE_RS11950	Rhizobium_etli_GCF_000092045.1_ASM9204v1	100.00	1e-74	0.0392753973787941	-	Hpt domain-containing protein
REMIM1_RS11785	Rhizobium_etli_GCF_000442435.1_ASM44243v1	99.21	1e-73	0.0342773361756	-	Hpt domain-containing protein
RL_RS13695	Rhizobium_leguminosarum_GCF_000009265.1_ASM926v1	89.43	7e-67	0.04522152989625	-	MULTISPECIES: Hpt domain-containing protein
NGR_c16670	Sinorhizobium_fredii_GCF_000018545.1_ASM1854v1	54.92	3e-27	0.0324996168744352	-	hypothetical protein NGR_c16670
SMc00191	Sinorhizobium_meliloti_GCF_000006965.1_ASM696v1	55.74	2e-27	0.027736979469352	-	hypothetical protein SMc00191
/home/htaboada/sp27/red_etli/bin/footprint_discovery_enero_2018/etli_23_Feb_2018/Rhizobiales/Rhizobium_etli_GCF_000092045.1_ASM9204v1/RHE_RS06440/RHE_RS06440_Rhizobium_etli_GCF_000092045.1_ASM9204v1_Rhizobiales_taxfreq_ortho_bbh.tab
BBTA_RS25335	Bradyrhizobium_sp._BTAi1_GCF_000015165.1_ASM1516v1	33.64	1e-06	0.0351308241342216	-	DUF2336 domain-containing protein
MAFF_RS31200	Mesorhizobium_loti_GCF_000009625.1_ASM962v1	32.35	2e-21	0.0296011548505344	-	hypothetical protein
RHE_RS06440	Rhizobium_etli_GCF_000092045.1_ASM9204v1	100.00	0.0	0.0392753973787941	-	DUF2336 domain-containing protein
REMIM1_RS06650	Rhizobium_etli_GCF_000442435.1_ASM44243v1	99.16	0.0	0.034777735243857	-	DUF2336 domain-containing protein
RL_RS07230	Rhizobium_leguminosarum_GCF_000009265.1_ASM926v1	86.82	0.0	0.0240934380594774	-	DUF2336 domain-containing protein
NGR_c07640	Sinorhizobium_fredii_GCF_000018545.1_ASM1854v1	48.86	8e-81	0.0211379621947546	-	hypothetical protein NGR_c07640
SMc00120	Sinorhizobium_meliloti_GCF_000006965.1_ASM696v1	44.44	7e-75	0.0235103921216412	-	hypothetical protein SMc00120
/home/htaboada/sp27/red_etli/bin/footprint_discovery_enero_2018/etli_23_Feb_2018/Rhizobiales/Rhizobium_etli_GCF_000092045.1_ASM9204v1/RHE_RS02420/RHE_RS02420_Rhizobium_etli_GCF_000092045.1_ASM9204v1_Rhizobiales_taxfreq_ortho_bbh.tab
AAV28_RS30785	Bradyrhizobium_diazoefficiens_GCF_001642675.1_ASM164267v1	27.13	1e-13	0.0523232947522193	-	MULTISPECIES: transaldolase
BBTA_RS29585	Bradyrhizobium_sp._BTAi1_GCF_000015165.1_ASM1516v1	27.70	7e-15
MAFF_RS22160	Mesorhizobium_loti_GCF_000009625.1_ASM962v1	70.84	0.0	0.0407522748284755	-	glucose-6-phosphate isomerase
RHE_RS02420	Rhizobium_etli_GCF_000092045.1_ASM9204v1	100.00	0.0	0.0392753973787941	-	glucose-6-phosphate isomerase
REMIM1_RS02840	Rhizobium_etli_GCF_000442435.1_ASM44243v1	100.00	0.0	0.034777735243857	-	glucose-6-phosphate isomerase
RL_RS02635	Rhizobium_leguminosarum_GCF_000009265.1_ASM926v1	96.86	0.0	0.042256183673545	-	glucose-6-phosphate isomerase
NGR_c01170	Sinorhizobium_fredii_GCF_000018545.1_ASM1854v1	81.70	0.0	0.0536375790691898	pgi	glucose-6-phosphate isomerase
SMc02163	Sinorhizobium_meliloti_GCF_000006965.1_ASM696v1	81.52	0.0	0.0581155760310232	pgi	glucose-6-phosphate isomerase
AZC_RS18710	Azorhizobium_caulinodans_GCF_000010525.1_ASM1052v1	65.23	0.0
/home/htaboada/sp27/red_etli/bin/footprint_discovery_enero_2018/etli_23_Feb_2018/Rhizobiales/Rhizobium_etli_GCF_000092045.1_ASM9204v1/RHE_RS20155/RHE_RS20155_Rhizobium_etli_GCF_000092045.1_ASM9204v1_Rhizobiales_taxfreq_ortho_bbh.tab
AAV28_RS40810	Bradyrhizobium_diazoefficiens_GCF_001642675.1_ASM164267v1	51.18	7e-54	0.0272151365321946	-	N-acetyltransferase
BBTA_RS01840	Bradyrhizobium_sp._BTAi1_GCF_000015165.1_ASM1516v1	48.24	3e-50	0.0296757272189698	-	N-acetyltransferase
MAFF_RS17950	Mesorhizobium_loti_GCF_000009625.1_ASM962v1	52.15	1e-63	0.0389275461048124	-	N-acetyltransferase
RHE_RS20155	Rhizobium_etli_GCF_000092045.1_ASM9204v1	100.00	1e-136	0.0389907930499623	-	N-acetyltransferase
REMIM1_RS19925	Rhizobium_etli_GCF_000442435.1_ASM44243v1	99.46	1e-135	0.034777735243857	-	N-acetyltransferase
RL_RS23350	Rhizobium_leguminosarum_GCF_000009265.1_ASM926v1	85.41	2e-116	0.0248347746151537	-	N-acetyltransferase
NGR_c32410	Sinorhizobium_fredii_GCF_000018545.1_ASM1854v1	68.85	2e-88	0.0324996168744352	-	GCN5-related N-acetyltransferase
SMc03840	Sinorhizobium_meliloti_GCF_000006965.1_ASM696v1	66.67	2e-87	0.0409450649309481	-	acetyltransferase (antibiotic resistance) protein
AZC_RS04910	Azorhizobium_caulinodans_GCF_000010525.1_ASM1052v1	56.98	2e-64	0.0538653237111261	-	N-acetyltransferase
/home/htaboada/sp27/red_etli/bin/footprint_discovery_enero_2018/etli_23_Feb_2018/Rhizobiales/Rhizobium_etli_GCF_000092045.1_ASM9204v1/RHE_RS18935/RHE_RS18935_Rhizobium_etli_GCF_000092045.1_ASM9204v1_Rhizobiales_taxfreq_ortho_bbh.tab
MAFF_RS20475	Mesorhizobium_loti_GCF_000009625.1_ASM962v1	48.00	3e-80	0.0271681832189837	-	NAD(P)-dependent oxidoreductase
RHE_RS18935	Rhizobium_etli_GCF_000092045.1_ASM9204v1	100.00	0.0	0.0389907930499623	-	SDR family NAD(P)-dependent oxidoreductase
REMIM1_RS18705	Rhizobium_etli_GCF_000442435.1_ASM44243v1	99.63	0.0	0.0325259394367008	-	SDR family NAD(P)-dependent oxidoreductase
RL_RS21850	Rhizobium_leguminosarum_GCF_000009265.1_ASM926v1	92.67	0.0	0.025946779448668	-	SDR family NAD(P)-dependent oxidoreductase
SMc00165	Sinorhizobium_meliloti_GCF_000006965.1_ASM696v1	89.01	8e-173	0.034605183909382	-	short chain dehydrogenase
/home/htaboada/sp27/red_etli/bin/footprint_discovery_enero_2018/etli_23_Feb_2018/Rhizobiales/Rhizobium_etli_GCF_000092045.1_ASM9204v1/RHE_RS06280/RHE_RS06280_Rhizobium_etli_GCF_000092045.1_ASM9204v1_Rhizobiales_taxfreq_ortho_bbh.tab
AAV28_RS18200	Bradyrhizobium_diazoefficiens_GCF_001642675.1_ASM164267v1	52.38	4e-55
MAFF_RS01710	Mesorhizobium_loti_GCF_000009625.1_ASM962v1	36.36	1e-26
RHE_RS06280	Rhizobium_etli_GCF_000092045.1_ASM9204v1	100.00	2e-125	0.0389907930499623	-	DUF1697 domain-containing protein
REMIM1_RS06490	Rhizobium_etli_GCF_000442435.1_ASM44243v1	100.00	3e-125	0.0397817259264263	-	DUF1697 domain-containing protein
RL_RS07085	Rhizobium_leguminosarum_GCF_000009265.1_ASM926v1	84.21	6e-107
NGR_c07410	Sinorhizobium_fredii_GCF_000018545.1_ASM1854v1	72.51	4e-89
SMc00112	Sinorhizobium_meliloti_GCF_000006965.1_ASM696v1	82.43	5e-41
/home/htaboada/sp27/red_etli/bin/footprint_discovery_enero_2018/etli_23_Feb_2018/Rhizobiales/Rhizobium_etli_GCF_000092045.1_ASM9204v1/RHE_RS03195/RHE_RS03195_Rhizobium_etli_GCF_000092045.1_ASM9204v1_Rhizobiales_taxfreq_ortho_bbh.tab
AAV28_RS20395	Bradyrhizobium_diazoefficiens_GCF_001642675.1_ASM164267v1	47.38	5e-149	0.0147488481851893	-	MULTISPECIES: protein translocase subunit SecD
BBTA_RS20585	Bradyrhizobium_sp._BTAi1_GCF_000015165.1_ASM1516v1	48.24	4e-156	0.0257480574399885	secD	protein translocase subunit SecD
MAFF_RS05440	Mesorhizobium_loti_GCF_000009625.1_ASM962v1	46.70	0.0	0.0111511199779411	-	MULTISPECIES: protein translocase subunit SecDF
RHE_RS03195	Rhizobium_etli_GCF_000092045.1_ASM9204v1	100.00	0.0	0.0389907930499623	-	protein translocase subunit SecDF
REMIM1_RS03590	Rhizobium_etli_GCF_000442435.1_ASM44243v1	99.88	0.0	0.0225179580715621	-	protein translocase subunit SecD
RL_RS03580	Rhizobium_leguminosarum_GCF_000009265.1_ASM926v1	94.76	0.0
NGR_c02010	Sinorhizobium_fredii_GCF_000018545.1_ASM1854v1	58.21	0.0	0.0269509017983121	secD1	preprotein translocase subunit SecD
SMc02265	Sinorhizobium_meliloti_GCF_000006965.1_ASM696v1	58.38	0.0	0.0264161709231923	secD2	preprotein translocase subunit SecD
/home/htaboada/sp27/red_etli/bin/footprint_discovery_enero_2018/etli_23_Feb_2018/Rhizobiales/Rhizobium_etli_GCF_000092045.1_ASM9204v1/RHE_RS29995/RHE_RS29995_Rhizobium_etli_GCF_000092045.1_ASM9204v1_Rhizobiales_taxfreq_ortho_bbh.tab
RHE_RS29995	Rhizobium_etli_GCF_000092045.1_ASM9204v1	100.00	4e-126	0.0387061887211304	-	MULTISPECIES: flavin reductase
RL_RS34015	Rhizobium_leguminosarum_GCF_000009265.1_ASM926v1	37.16	9e-32	0.0233521015038012	-	flavin reductase
AZC_RS16295	Azorhizobium_caulinodans_GCF_000010525.1_ASM1052v1	40.00	2e-35	0.0700898188048388	-	flavin reductase
/home/htaboada/sp27/red_etli/bin/footprint_discovery_enero_2018/etli_23_Feb_2018/Rhizobiales/Rhizobium_etli_GCF_000092045.1_ASM9204v1/RHE_RS29130/RHE_RS29130_Rhizobium_etli_GCF_000092045.1_ASM9204v1_Rhizobiales_taxfreq_ortho_bbh.tab
AAV28_RS12600	Bradyrhizobium_diazoefficiens_GCF_001642675.1_ASM164267v1	75.39	2e-144	0.0222988538037982	-	MULTISPECIES: CbbQ
BBTA_RS09725	Bradyrhizobium_sp._BTAi1_GCF_000015165.1_ASM1516v1	74.22	3e-141	0.0220385915376173	-	CbbQ
RHE_RS29130	Rhizobium_etli_GCF_000092045.1_ASM9204v1	100.00	0.0	0.0387061887211304	-	CbbQ/NirQ/NorQ/GpvN family protein
REMIM1_RS30460	Rhizobium_etli_GCF_000442435.1_ASM44243v1	100.00	0.0	0.0410327235970687	-	CbbQ/NirQ/NorQ/GpvN family protein
NGR_c09870	Sinorhizobium_fredii_GCF_000018545.1_ASM1854v1	79.55	5e-158	0.0251013301062711	norQ	NorQ protein required for nitric oxide reductase activity
SMa1272	Sinorhizobium_meliloti_GCF_000006965.1_ASM696v1	77.32	3e-155	0.0182271579370027	norQ	NorQ accessory protein for nitric oxide reductase (plasmid)
/home/htaboada/sp27/red_etli/bin/footprint_discovery_enero_2018/etli_23_Feb_2018/Rhizobiales/Rhizobium_etli_GCF_000092045.1_ASM9204v1/RHE_RS26890/RHE_RS26890_Rhizobium_etli_GCF_000092045.1_ASM9204v1_Rhizobiales_taxfreq_ortho_bbh.tab
AAV28_RS16090	Bradyrhizobium_diazoefficiens_GCF_001642675.1_ASM164267v1	68.08	6e-174	0.022123272277784	-	MULTISPECIES: ABC transporter ATP-binding protein
BBTA_RS16625	Bradyrhizobium_sp._BTAi1_GCF_000015165.1_ASM1516v1	67.14	2e-169	0.0309849504786302	-	ABC transporter ATP-binding protein
MAFF_RS28605	Mesorhizobium_loti_GCF_000009625.1_ASM962v1	66.10	1e-168	0.00466319562713899	-	ABC transporter ATP-binding protein
RHE_RS26890	Rhizobium_etli_GCF_000092045.1_ASM9204v1	100.00	0.0	0.0387061887211304	-	ABC transporter ATP-binding protein
REMIM1_RS29905	Rhizobium_etli_GCF_000442435.1_ASM44243v1	99.15	0.0	0.0332765380390862	-	sn-glycerol-3-phosphate ABC transporter ATP-binding protein UgpC
RL_RS34055	Rhizobium_leguminosarum_GCF_000009265.1_ASM926v1	91.83	0.0	0.012973389724334	-	ABC transporter ATP-binding protein
NGR_b20260	Sinorhizobium_fredii_GCF_000018545.1_ASM1854v1	82.25	0.0	0.0288004734903532	-	sugar ABC transporter ATP-binding protein (plasmid)
SM_b20661	Sinorhizobium_meliloti_GCF_000006965.1_ASM696v1	82.20	0.0	0.0266803326324243	-	sugar uptake ABC transporter ATP-binding protein (plasmid)
AZC_RS21605	Azorhizobium_caulinodans_GCF_000010525.1_ASM1052v1	70.54	0.0	0.0629510409636052	-	sn-glycerol-3-phosphate ABC transporter ATP-binding protein UgpC
/home/htaboada/sp27/red_etli/bin/footprint_discovery_enero_2018/etli_23_Feb_2018/Rhizobiales/Rhizobium_etli_GCF_000092045.1_ASM9204v1/RHE_RS25585/RHE_RS25585_Rhizobium_etli_GCF_000092045.1_ASM9204v1_Rhizobiales_taxfreq_ortho_bbh.tab
BBTA_RS27740	Bradyrhizobium_sp._BTAi1_GCF_000015165.1_ASM1516v1	79.46	4e-112
MAFF_RS28025	Mesorhizobium_loti_GCF_000009625.1_ASM962v1	50.71	1e-95	0.0239242210435826	-	KR domain-containing protein
RHE_RS25585	Rhizobium_etli_GCF_000092045.1_ASM9204v1	100.00	0.0	0.0387061887211304	-	SDR family NAD(P)-dependent oxidoreductase
REMIM1_RS25830	Rhizobium_etli_GCF_000442435.1_ASM44243v1	99.65	0.0	0.0317753408343154	-	SDR family NAD(P)-dependent oxidoreductase
RL_RS31890	Rhizobium_leguminosarum_GCF_000009265.1_ASM926v1	94.39	0.0	0.0214987601146106	-	SDR family NAD(P)-dependent oxidoreductase
NGR_c30370	Sinorhizobium_fredii_GCF_000018545.1_ASM1854v1	82.46	9e-178	0.0227233093593612	-	oxidoreductase
SM_b20073	Sinorhizobium_meliloti_GCF_000006965.1_ASM696v1	79.30	4e-172	0.0319635668170627	-	oxidoreductase (plasmid)
AZC_RS04205	Azorhizobium_caulinodans_GCF_000010525.1_ASM1052v1	74.63	3e-150	0.0525673641036291	-	KR domain-containing protein
/home/htaboada/sp27/red_etli/bin/footprint_discovery_enero_2018/etli_23_Feb_2018/Rhizobiales/Rhizobium_etli_GCF_000092045.1_ASM9204v1/RHE_RS13750/RHE_RS13750_Rhizobium_etli_GCF_000092045.1_ASM9204v1_Rhizobiales_taxfreq_ortho_bbh.tab
AAV28_RS41375	Bradyrhizobium_diazoefficiens_GCF_001642675.1_ASM164267v1	69.44	3e-63	0.0305511855264636	-	MULTISPECIES: transcriptional regulator
RHE_RS13750	Rhizobium_etli_GCF_000092045.1_ASM9204v1	100.00	3e-95	0.0387061887211304	-	transcriptional regulator
REMIM1_RS13590	Rhizobium_etli_GCF_000442435.1_ASM44243v1	100.00	3e-95	0.0330263385049577	-	transcriptional regulator
RL_RS16245	Rhizobium_leguminosarum_GCF_000009265.1_ASM926v1	94.56	2e-89	0.0240934380594774	-	transcriptional regulator
NGR_b03360	Sinorhizobium_fredii_GCF_000018545.1_ASM1854v1	87.07	8e-82	0.0393694545877305	-	hypothetical protein NGR_b03360 (plasmid)
SM_b20256	Sinorhizobium_meliloti_GCF_000006965.1_ASM696v1	85.71	2e-81	0.0285294645970477	-	hypothetical protein SM_b20256 (plasmid)
/home/htaboada/sp27/red_etli/bin/footprint_discovery_enero_2018/etli_23_Feb_2018/Rhizobiales/Rhizobium_etli_GCF_000092045.1_ASM9204v1/RHE_RS00120/RHE_RS00120_Rhizobium_etli_GCF_000092045.1_ASM9204v1_Rhizobiales_taxfreq_ortho_bbh.tab
AAV28_RS00585	Bradyrhizobium_diazoefficiens_GCF_001642675.1_ASM164267v1	65.37	1e-141	0.0249325766940106	-	MULTISPECIES: acetyl-CoA carboxylase carboxyl transferase subunit beta
BBTA_RS00450	Bradyrhizobium_sp._BTAi1_GCF_000015165.1_ASM1516v1	63.25	8e-140	0.0386220861599827	-	acetyl-CoA carboxylase carboxyl transferase subunit beta
MAFF_RS20795	Mesorhizobium_loti_GCF_000009625.1_ASM962v1	71.13	3e-151	0.0178417919647057	-	MULTISPECIES: acetyl-CoA carboxylase carboxyl transferase subunit beta
RHE_RS00120	Rhizobium_etli_GCF_000092045.1_ASM9204v1	100.00	0.0	0.0387061887211304	-	acetyl-CoA carboxylase carboxyl transferase subunit beta
REMIM1_RS00560	Rhizobium_etli_GCF_000442435.1_ASM44243v1	100.00	0.0	0.0322757399025723	-	acetyl-CoA carboxylase carboxyl transferase subunit beta
RL_RS00115	Rhizobium_leguminosarum_GCF_000009265.1_ASM926v1	96.01	0.0	0.0429975202292213	-	acetyl-CoA carboxylase carboxyl transferase subunit beta
NGR_c33800	Sinorhizobium_fredii_GCF_000018545.1_ASM1854v1	89.20	0.0	0.0324996168744352	accD	acetyl-CoA carboxylase subunit beta
SMc02764	Sinorhizobium_meliloti_GCF_000006965.1_ASM696v1	86.51	0.0	0.0607571931233424	accD	acetyl-CoA carboxylase subunit beta
AZC_RS05245	Azorhizobium_caulinodans_GCF_000010525.1_ASM1052v1	63.96	2e-139	0.158351072114636	-	acetyl-CoA carboxylase carboxyl transferase subunit beta
/home/htaboada/sp27/red_etli/bin/footprint_discovery_enero_2018/etli_23_Feb_2018/Rhizobiales/Rhizobium_etli_GCF_000092045.1_ASM9204v1/RHE_RS26895/RHE_RS26895_Rhizobium_etli_GCF_000092045.1_ASM9204v1_Rhizobiales_taxfreq_ortho_bbh.tab
AAV28_RS16095	Bradyrhizobium_diazoefficiens_GCF_001642675.1_ASM164267v1	44.55	1e-123	0.0417884031913698	-	MULTISPECIES: carbohydrate ABC transporter substrate-binding protein
BBTA_RS16630	Bradyrhizobium_sp._BTAi1_GCF_000015165.1_ASM1516v1	41.91	4e-112	0.0346944163810014	-	ABC transporter substrate-binding protein
RHE_RS26895	Rhizobium_etli_GCF_000092045.1_ASM9204v1	100.00	0.0	0.0384215843922986	-	carbohydrate ABC transporter substrate-binding protein
REMIM1_RS29910	Rhizobium_etli_GCF_000442435.1_ASM44243v1	100.00	0.0	0.0350279347779854	-	carbohydrate ABC transporter substrate-binding protein
RL_RS34050	Rhizobium_leguminosarum_GCF_000009265.1_ASM926v1	92.63	0.0	0.0352134863946209	-	carbohydrate ABC transporter substrate-binding protein
NGR_b20250	Sinorhizobium_fredii_GCF_000018545.1_ASM1854v1	86.64	0.0	0.035406086676214	-	sugar ABC transporter substrate-binding protein (plasmid)
SM_b20660	Sinorhizobium_meliloti_GCF_000006965.1_ASM696v1	86.64	0.0	0.024038715540105	-	sugar uptake ABC transporter substrate-binding protein precursor (plasmid)
AZC_RS21610	Azorhizobium_caulinodans_GCF_000010525.1_ASM1052v1	69.19	0.0	0.0318000103836769	-	carbohydrate ABC transporter substrate-binding protein
/home/htaboada/sp27/red_etli/bin/footprint_discovery_enero_2018/etli_23_Feb_2018/Rhizobiales/Rhizobium_etli_GCF_000092045.1_ASM9204v1/RHE_RS25535/RHE_RS25535_Rhizobium_etli_GCF_000092045.1_ASM9204v1_Rhizobiales_taxfreq_ortho_bbh.tab
MAFF_RS23360	Mesorhizobium_loti_GCF_000009625.1_ASM962v1	62.78	2e-127	0.0322368741180478	-	MULTISPECIES: rhamnose ABC transporter substrate-binding protein
RHE_RS25535	Rhizobium_etli_GCF_000092045.1_ASM9204v1	100.00	0.0	0.0384215843922986	rhaS	MULTISPECIES: rhamnose ABC transporter substrate-binding protein
REMIM1_RS25780	Rhizobium_etli_GCF_000442435.1_ASM44243v1	100.00	0.0	0.0372797305851417	-	MULTISPECIES: rhamnose ABC transporter substrate-binding protein
RL_RS31845	Rhizobium_leguminosarum_GCF_000009265.1_ASM926v1	97.09	0.0	0.04522152989625	-	MULTISPECIES: rhamnose ABC transporter substrate-binding protein
NGR_c02450	Sinorhizobium_fredii_GCF_000018545.1_ASM1854v1	69.08	2e-154	0.0507311092674111	-	rhamnose ABC transporter, periplasmic rhamnose-binding protein
SMc02324	Sinorhizobium_meliloti_GCF_000006965.1_ASM696v1	68.83	2e-155	0.0295861114339754	-	periplasmic binding ABC transporter protein
/home/htaboada/sp27/red_etli/bin/footprint_discovery_enero_2018/etli_23_Feb_2018/Rhizobiales/Rhizobium_etli_GCF_000092045.1_ASM9204v1/RHE_RS25030/RHE_RS25030_Rhizobium_etli_GCF_000092045.1_ASM9204v1_Rhizobiales_taxfreq_ortho_bbh.tab
RHE_RS25030	Rhizobium_etli_GCF_000092045.1_ASM9204v1	100.00	0.0	0.0384215843922986	-	peptide ABC transporter
REMIM1_RS25280	Rhizobium_etli_GCF_000442435.1_ASM44243v1	99.53	0.0	0.0357785333803708	-	peptide ABC transporter substrate-binding protein
RL_RS31175	Rhizobium_leguminosarum_GCF_000009265.1_ASM926v1	96.06	0.0
/home/htaboada/sp27/red_etli/bin/footprint_discovery_enero_2018/etli_23_Feb_2018/Rhizobiales/Rhizobium_etli_GCF_000092045.1_ASM9204v1/RHE_RS16795/RHE_RS16795_Rhizobium_etli_GCF_000092045.1_ASM9204v1_Rhizobiales_taxfreq_ortho_bbh.tab
RHE_RS16795	Rhizobium_etli_GCF_000092045.1_ASM9204v1	100.00	0.0	0.0384215843922986	-	alpha-glucosidase
REMIM1_RS16560	Rhizobium_etli_GCF_000442435.1_ASM44243v1	99.82	0.0	0.0285227468906453	-	alpha-glucosidase
/home/htaboada/sp27/red_etli/bin/footprint_discovery_enero_2018/etli_23_Feb_2018/Rhizobiales/Rhizobium_etli_GCF_000092045.1_ASM9204v1/RHE_RS12370/RHE_RS12370_Rhizobium_etli_GCF_000092045.1_ASM9204v1_Rhizobiales_taxfreq_ortho_bbh.tab
AAV28_RS36260	Bradyrhizobium_diazoefficiens_GCF_001642675.1_ASM164267v1	38.34	4e-34	0.0207186200696708	-	MULTISPECIES: DUF2270 domain-containing protein
MAFF_RS10050	Mesorhizobium_loti_GCF_000009625.1_ASM962v1	57.08	1e-65	0.0259516974032083	-	DUF2270 domain-containing protein
RHE_RS12370	Rhizobium_etli_GCF_000092045.1_ASM9204v1	100.00	5e-151	0.0384215843922986	-	DUF2270 domain-containing protein
REMIM1_RS12205	Rhizobium_etli_GCF_000442435.1_ASM44243v1	100.00	6e-151	0.0357785333803708	-	DUF2270 domain-containing protein
RL_RS14230	Rhizobium_leguminosarum_GCF_000009265.1_ASM926v1	87.55	1e-134	0.0255761111708299	-	DUF2270 domain-containing protein
NGR_c17220	Sinorhizobium_fredii_GCF_000018545.1_ASM1854v1	64.93	8e-89	0.0401621281700338	-	transmembrane protein
SMc00135	Sinorhizobium_meliloti_GCF_000006965.1_ASM696v1	63.51	7e-87	0.0256236857954966	-	hypothetical protein SMc00135
/home/htaboada/sp27/red_etli/bin/footprint_discovery_enero_2018/etli_23_Feb_2018/Rhizobiales/Rhizobium_etli_GCF_000092045.1_ASM9204v1/RHE_RS10795/RHE_RS10795_Rhizobium_etli_GCF_000092045.1_ASM9204v1_Rhizobiales_taxfreq_ortho_bbh.tab
AAV28_RS20215	Bradyrhizobium_diazoefficiens_GCF_001642675.1_ASM164267v1	85.09	1e-70	0.0247569951679964	-	MULTISPECIES: single-stranded DNA-binding protein
BBTA_RS20440	Bradyrhizobium_sp._BTAi1_GCF_000015165.1_ASM1516v1	83.33	2e-69	0.0373128629003223	-	single-stranded DNA-binding protein
MAFF_RS04125	Mesorhizobium_loti_GCF_000009625.1_ASM962v1	76.32	1e-62	0.0289929119426467	-	single-stranded DNA-binding protein
RHE_RS10795	Rhizobium_etli_GCF_000092045.1_ASM9204v1	100.00	8e-84	0.0384215843922986	-	single-stranded DNA-binding protein
REMIM1_RS10640	Rhizobium_etli_GCF_000442435.1_ASM44243v1	100.00	9e-84	0.0400319254605548	-	single-stranded DNA-binding protein
RL_RS12375	Rhizobium_leguminosarum_GCF_000009265.1_ASM926v1	96.49	1e-78	0.0337308132832684	-	single-stranded DNA-binding protein
NGR_c15580	Sinorhizobium_fredii_GCF_000018545.1_ASM1854v1	93.86	6e-77	0.035406086676214	-	single-stranded DNA-binding protein
SMc01233	Sinorhizobium_meliloti_GCF_000006965.1_ASM696v1	95.61	6e-78	0.0353976690370777	ssb	single-stranded DNA-binding protein
AZC_RS14925	Azorhizobium_caulinodans_GCF_000010525.1_ASM1052v1	65.79	2e-50	0.0999428897772701	-	single-stranded DNA-binding protein
/home/htaboada/sp27/red_etli/bin/footprint_discovery_enero_2018/etli_23_Feb_2018/Rhizobiales/Rhizobium_etli_GCF_000092045.1_ASM9204v1/RHE_RS07055/RHE_RS07055_Rhizobium_etli_GCF_000092045.1_ASM9204v1_Rhizobiales_taxfreq_ortho_bbh.tab
AAV28_RS22155	Bradyrhizobium_diazoefficiens_GCF_001642675.1_ASM164267v1	61.43	3e-120	0.0280930441622654	-	MULTISPECIES: 4-hydroxy-tetrahydrodipicolinate synthase
BBTA_RS21995	Bradyrhizobium_sp._BTAi1_GCF_000015165.1_ASM1516v1	62.80	2e-119	0.0346944163810014	-	4-hydroxy-tetrahydrodipicolinate synthase
MAFF_RS31545	Mesorhizobium_loti_GCF_000009625.1_ASM962v1	71.77	1e-157	0.0281819213987965	-	4-hydroxy-tetrahydrodipicolinate synthase
RHE_RS07055	Rhizobium_etli_GCF_000092045.1_ASM9204v1	100.00	0.0	0.0384215843922986	-	4-hydroxy-tetrahydrodipicolinate synthase
REMIM1_RS07230	Rhizobium_etli_GCF_000442435.1_ASM44243v1	99.32	0.0	0.0372797305851417	-	4-hydroxy-tetrahydrodipicolinate synthase
RL_RS07805	Rhizobium_leguminosarum_GCF_000009265.1_ASM926v1	95.24	0.0	0.035584154672459	-	4-hydroxy-tetrahydrodipicolinate synthase
NGR_c08200	Sinorhizobium_fredii_GCF_000018545.1_ASM1854v1	82.99	0.0
SMc02404	Sinorhizobium_meliloti_GCF_000006965.1_ASM696v1	81.63	0.0	0.048341592789442	dapA	dihydrodipicolinate synthase
AZC_RS06400	Azorhizobium_caulinodans_GCF_000010525.1_ASM1052v1	65.65	1e-137	0.0610041015523597	-	4-hydroxy-tetrahydrodipicolinate synthase
/home/htaboada/sp27/red_etli/bin/footprint_discovery_enero_2018/etli_23_Feb_2018/Rhizobiales/Rhizobium_etli_GCF_000092045.1_ASM9204v1/RHE_RS02805/RHE_RS02805_Rhizobium_etli_GCF_000092045.1_ASM9204v1_Rhizobiales_taxfreq_ortho_bbh.tab
AAV28_RS02640	Bradyrhizobium_diazoefficiens_GCF_001642675.1_ASM164267v1	47.85	1e-38	0.0302000224744353	-	hypothetical protein
BBTA_RS03805	Bradyrhizobium_sp._BTAi1_GCF_000015165.1_ASM1516v1	50.38	2e-36	0.0464774257179453	-	hypothetical protein
MAFF_RS23010	Mesorhizobium_loti_GCF_000009625.1_ASM962v1	58.46	8e-78	0.0318313788461227	-	peptidoglycan-binding protein
RHE_RS02805	Rhizobium_etli_GCF_000092045.1_ASM9204v1	100.00	0.0	0.0384215843922986	-	hemagglutinin
REMIM1_RS03205	Rhizobium_etli_GCF_000442435.1_ASM44243v1	99.84	0.0	0.0375299301192701	-	peptidoglycan-binding protein
RL_RS03085	Rhizobium_leguminosarum_GCF_000009265.1_ASM926v1	83.62	0.0	0.0374374960616495	-	hemagglutinin
NGR_c01700	Sinorhizobium_fredii_GCF_000018545.1_ASM1854v1	53.30	9e-144	0.0332922904567385	-	peptidoglycan-binding protein
SMc02230	Sinorhizobium_meliloti_GCF_000006965.1_ASM696v1	51.53	2e-139	0.0361901541647735	-	hypothetical protein SMc02230
AZC_RS02600	Azorhizobium_caulinodans_GCF_000010525.1_ASM1052v1	42.86	7e-37	0.0616530813561082	-	Sel1 repeat-containing protein
/home/htaboada/sp27/red_etli/bin/footprint_discovery_enero_2018/etli_23_Feb_2018/Rhizobiales/Rhizobium_etli_GCF_000092045.1_ASM9204v1/RHE_RS02640/RHE_RS02640_Rhizobium_etli_GCF_000092045.1_ASM9204v1_Rhizobiales_taxfreq_ortho_bbh.tab
AAV28_RS02370	Bradyrhizobium_diazoefficiens_GCF_001642675.1_ASM164267v1	64.47	0.0	0.0205430385436566	-	O-succinylhomoserine sulfhydrylase
BBTA_RS03595	Bradyrhizobium_sp._BTAi1_GCF_000015165.1_ASM1516v1	66.67	0.0	0.0224749992908374	-	O-succinylhomoserine sulfhydrylase
MAFF_RS23135	Mesorhizobium_loti_GCF_000009625.1_ASM962v1	80.88	0.0	0.0283846690347591	-	O-succinylhomoserine sulfhydrylase
RHE_RS02640	Rhizobium_etli_GCF_000092045.1_ASM9204v1	100.00	0.0	0.0384215843922986	-	O-succinylhomoserine sulfhydrylase
REMIM1_RS03040	Rhizobium_etli_GCF_000442435.1_ASM44243v1	99.24	0.0	0.0380303291875271	-	O-succinylhomoserine sulfhydrylase
RL_RS02910	Rhizobium_leguminosarum_GCF_000009265.1_ASM926v1	93.91	0.0	0.0218694283924487	-	O-succinylhomoserine sulfhydrylase
NGR_c01560	Sinorhizobium_fredii_GCF_000018545.1_ASM1854v1	89.34	0.0	0.0224590848319268	metZ	O-succinylhomoserine sulfhydrylase
SMc02217	Sinorhizobium_meliloti_GCF_000006965.1_ASM696v1	89.59	0.0	0.030906919980135	metZ	O-succinylhomoserine sulfhydrylase
AZC_RS20625	Azorhizobium_caulinodans_GCF_000010525.1_ASM1052v1	67.10	2e-178	0.0467265458698925	-	O-succinylhomoserine sulfhydrylase
/home/htaboada/sp27/red_etli/bin/footprint_discovery_enero_2018/etli_23_Feb_2018/Rhizobiales/Rhizobium_etli_GCF_000092045.1_ASM9204v1/RHE_RS02060/RHE_RS02060_Rhizobium_etli_GCF_000092045.1_ASM9204v1_Rhizobiales_taxfreq_ortho_bbh.tab
AAV28_RS00470	Bradyrhizobium_diazoefficiens_GCF_001642675.1_ASM164267v1	66.90	2e-66	0.0182604787054725	-	MULTISPECIES: nitrogen regulatory protein
BBTA_RS00570	Bradyrhizobium_sp._BTAi1_GCF_000015165.1_ASM1516v1	64.71	6e-65	0.0222567954142273	ptsN	PTS IIA-like nitrogen-regulatory protein PtsN
MAFF_RS13560	Mesorhizobium_loti_GCF_000009625.1_ASM962v1	73.38	7e-76	0.0237214734076201	-	MULTISPECIES: PTS IIA-like nitrogen-regulatory protein PtsN
RHE_RS02060	Rhizobium_etli_GCF_000092045.1_ASM9204v1	100.00	1e-103	0.0384215843922986	ptsN	MULTISPECIES: PTS IIA-like nitrogen-regulatory protein PtsN
REMIM1_RS02475	Rhizobium_etli_GCF_000442435.1_ASM44243v1	100.00	1e-103	0.0352781343121139	-	MULTISPECIES: PTS IIA-like nitrogen-regulatory protein PtsN
RL_RS02215	Rhizobium_leguminosarum_GCF_000009265.1_ASM926v1	98.05	6e-101	0.025946779448668	-	PTS IIA-like nitrogen-regulatory protein PtsN
NGR_c00150	Sinorhizobium_fredii_GCF_000018545.1_ASM1854v1	83.12	1e-87	0.0330280659293041	-	PTS system sugar transporter subunit IIA
SMc01141	Sinorhizobium_meliloti_GCF_000006965.1_ASM696v1	82.47	2e-87	0.0216612601570177	ptsN	nitrogen regulatory IIA protein
AZC_RS01745	Azorhizobium_caulinodans_GCF_000010525.1_ASM1052v1	64.29	1e-64	0.0499714448886351	-	PTS IIA-like nitrogen-regulatory protein PtsN
/home/htaboada/sp27/red_etli/bin/footprint_discovery_enero_2018/etli_23_Feb_2018/Rhizobiales/Rhizobium_etli_GCF_000092045.1_ASM9204v1/RHE_RS01610/RHE_RS01610_Rhizobium_etli_GCF_000092045.1_ASM9204v1_Rhizobiales_taxfreq_ortho_bbh.tab
AAV28_RS00980	Bradyrhizobium_diazoefficiens_GCF_001642675.1_ASM164267v1	64.52	0.0	0.0282686256882796	-	MULTISPECIES: DNA polymerase III subunit beta
BBTA_RS00010	Bradyrhizobium_sp._BTAi1_GCF_000015165.1_ASM1516v1	63.98	8e-169	0.0401495132962532	-	DNA polymerase III subunit beta
MAFF_RS22850	Mesorhizobium_loti_GCF_000009625.1_ASM962v1	76.61	0.0	0.0308176406663098	-	MULTISPECIES: DNA polymerase III subunit beta
RHE_RS01610	Rhizobium_etli_GCF_000092045.1_ASM9204v1	100.00	0.0	0.0384215843922986	-	DNA polymerase III subunit beta
REMIM1_RS02030	Rhizobium_etli_GCF_000442435.1_ASM44243v1	100.00	0.0	0.0352781343121139	-	DNA polymerase III subunit beta
RL_RS01745	Rhizobium_leguminosarum_GCF_000009265.1_ASM926v1	96.51	0.0	0.0289121256713729	-	DNA polymerase III subunit beta
NGR_c36750	Sinorhizobium_fredii_GCF_000018545.1_ASM1854v1	84.41	0.0	0.0332922904567385	dnaN	DNA polymerase III subunit beta
SMc00415	Sinorhizobium_meliloti_GCF_000006965.1_ASM696v1	84.95	0.0	0.0298502731432073	dnaN	DNA polymerase III subunit beta
AZC_RS05190	Azorhizobium_caulinodans_GCF_000010525.1_ASM1052v1	65.05	0.0	0.0733347178235813	-	DNA polymerase III subunit beta
/home/htaboada/sp27/red_etli/bin/footprint_discovery_enero_2018/etli_23_Feb_2018/Rhizobiales/Rhizobium_etli_GCF_000092045.1_ASM9204v1/RHE_RS18310/RHE_RS18310_Rhizobium_etli_GCF_000092045.1_ASM9204v1_Rhizobiales_taxfreq_ortho_bbh.tab
RHE_RS18310	Rhizobium_etli_GCF_000092045.1_ASM9204v1	100.00	0.0	0.0381369800634668	-	DUF475 domain-containing protein
REMIM1_RS18075	Rhizobium_etli_GCF_000442435.1_ASM44243v1	98.07	0.0	0.0337769371073431	-	DUF475 domain-containing protein
RL_RS21155	Rhizobium_leguminosarum_GCF_000009265.1_ASM926v1	94.77	0.0	0.0326188084497541	-	DUF475 domain-containing protein
NGR_b18640	Sinorhizobium_fredii_GCF_000018545.1_ASM1854v1	80.12	0.0	0.0502026602125422	-	hypothetical protein NGR_b18640 (plasmid)
SM_b21468	Sinorhizobium_meliloti_GCF_000006965.1_ASM696v1	81.56	0.0	0.0409450649309481	-	hypothetical protein SM_b21468 (plasmid)
/home/htaboada/sp27/red_etli/bin/footprint_discovery_enero_2018/etli_23_Feb_2018/Rhizobiales/Rhizobium_etli_GCF_000092045.1_ASM9204v1/RHE_RS06630/RHE_RS06630_Rhizobium_etli_GCF_000092045.1_ASM9204v1_Rhizobiales_taxfreq_ortho_bbh.tab
AAV28_RS12180	Bradyrhizobium_diazoefficiens_GCF_001642675.1_ASM164267v1	44.13	0.0
BBTA_RS14425	Bradyrhizobium_sp._BTAi1_GCF_000015165.1_ASM1516v1	44.44	0.0
MAFF_RS31370	Mesorhizobium_loti_GCF_000009625.1_ASM962v1	60.38	0.0
RHE_RS06630	Rhizobium_etli_GCF_000092045.1_ASM9204v1	100.00	0.0	0.0381369800634668	-	bifunctional glutamine-synthetase adenylyltransferase/deadenyltransferase
REMIM1_RS06805	Rhizobium_etli_GCF_000442435.1_ASM44243v1	99.70	0.0	0.0352781343121139	-	bifunctional glutamine-synthetase adenylyltransferase/deadenyltransferase
RL_RS07495	Rhizobium_leguminosarum_GCF_000009265.1_ASM926v1	92.08	0.0	0.0348428181167827	-	bifunctional glutamine-synthetase adenylyltransferase
NGR_c07860	Sinorhizobium_fredii_GCF_000018545.1_ASM1854v1	70.05	0.0	0.0235159829416645	-	bifunctional glutamine-synthetase adenylyltransferase
SMc02368	Sinorhizobium_meliloti_GCF_000006965.1_ASM696v1	71.14	0.0	0.0290577880155116	glnE	bifunctional glutamine-synthetase adenylyltransferase
AZC_RS05845	Azorhizobium_caulinodans_GCF_000010525.1_ASM1052v1	44.76	0.0	0.0545143035148746	-	bifunctional glutamine-synthetase adenylyltransferase
/home/htaboada/sp27/red_etli/bin/footprint_discovery_enero_2018/etli_23_Feb_2018/Rhizobiales/Rhizobium_etli_GCF_000092045.1_ASM9204v1/RHE_RS03640/RHE_RS03640_Rhizobium_etli_GCF_000092045.1_ASM9204v1_Rhizobiales_taxfreq_ortho_bbh.tab
AAV28_RS17940	Bradyrhizobium_diazoefficiens_GCF_001642675.1_ASM164267v1	40.06	7e-138	0.0172069895493876	-	acetoacetate--CoA ligase
MAFF_RS26700	Mesorhizobium_loti_GCF_000009625.1_ASM962v1	70.70	0.0	0.0342643504776734	-	acetoacetate--CoA ligase
RHE_RS03640	Rhizobium_etli_GCF_000092045.1_ASM9204v1	100.00	0.0	0.0381369800634668	-	acetoacetate--CoA ligase
REMIM1_RS04040	Rhizobium_etli_GCF_000442435.1_ASM44243v1	99.23	0.0	0.0357785333803708	-	acetoacetate--CoA ligase
RL_RS04025	Rhizobium_leguminosarum_GCF_000009265.1_ASM926v1	91.85	0.0	0.0348428181167827	-	acetoacetate--CoA ligase
NGR_c03330	Sinorhizobium_fredii_GCF_000018545.1_ASM1854v1	77.66	0.0	0.0295931470726565	acsA	acetoacetyl-CoA synthetase
SMc00774	Sinorhizobium_meliloti_GCF_000006965.1_ASM696v1	78.12	0.0	0.0364543158740054	acsA2	acetoacetyl-CoA synthetase
AZC_RS11610	Azorhizobium_caulinodans_GCF_000010525.1_ASM1052v1	66.87	0.0
/home/htaboada/sp27/red_etli/bin/footprint_discovery_enero_2018/etli_23_Feb_2018/Rhizobiales/Rhizobium_etli_GCF_000092045.1_ASM9204v1/RHE_RS01545/RHE_RS01545_Rhizobium_etli_GCF_000092045.1_ASM9204v1_Rhizobiales_taxfreq_ortho_bbh.tab
AAV28_RS16435	Bradyrhizobium_diazoefficiens_GCF_001642675.1_ASM164267v1	45.68	1e-106	0.0326581638386336	-	MULTISPECIES: RsmB
BBTA_RS16915	Bradyrhizobium_sp._BTAi1_GCF_000015165.1_ASM1516v1	45.62	2e-110	0.00632791242169208	-	RsmB
MAFF_RS28325	Mesorhizobium_loti_GCF_000009625.1_ASM962v1	53.97	2e-147	0.0375083126530745	-	MFS transporter
RHE_RS01545	Rhizobium_etli_GCF_000092045.1_ASM9204v1	100.00	0.0	0.0381369800634668	-	RsmB/NOP family class I SAM-dependent RNA methyltransferase
REMIM1_RS01965	Rhizobium_etli_GCF_000442435.1_ASM44243v1	99.30	0.0	0.0330263385049577	-	RsmB/NOP family class I SAM-dependent RNA methyltransferase
RL_RS01685	Rhizobium_leguminosarum_GCF_000009265.1_ASM926v1	93.22	0.0	0.0185334138919057	-	RsmB
NGR_c36610	Sinorhizobium_fredii_GCF_000018545.1_ASM1854v1	75.00	0.0	0.0317069432921319	-	Fmu (Sun) domain-containing protein
SMc00403	Sinorhizobium_meliloti_GCF_000006965.1_ASM696v1	73.60	0.0	0.02747281776012	-	NOL1
AZC_RS19065	Azorhizobium_caulinodans_GCF_000010525.1_ASM1052v1	46.79	4e-113
[truncated: 22,879 more rows]
