# Supplementary material for: RhizoBindingSites, a Database of DNA-Binding Motifs in Nitrogen-Fixing Bacteria Inferred Using a Footprint Discovery Approach
Source: Front Microbiol. 2020 Nov 5;11:567471. doi: 10.3389/fmicb.2020.567471 (PMC7674921; doi:10.3389/fmicb.2020.567471)
Supplement: Supplementary file 10 [file Table_10.XLSX]

## Sheet: Hoja1
	Supplementary Table 10.- COGK genes with vicinity at the ranges of p-value 1.0e-4 to 9.9e-4, 1.0e-5 to 9.9e-5 and 1.0e-6 to lower p-values.
			COGK Genes	COGK genes with aprobed matrices	COGK genes with vinicity at p-value 1.0e-4 to 9.9e-4	COGK genes with vinicity at p-value 1.0e-5 to 9.9e-5	COGK genes with vinicity at p-value 1.0e-6 to lower p-values
		Rhizobium etli CFN 42	511	449 (87,86%)	30 (6,68)	247 (55,01%)	292 (65,03%)
		Rhizobium etli bv. mimosae str. Mim1	546	471 (86,63%)	232 (49,25)	249 (52,86%)	324 (68,78%)
		Rhizobium leguminosarum bv. viciae 3841	671	574 (85,54%)	498 (86,75%)	6 (1,04%)	48 (8,36%)
		Sinorhizobium meliloti 1021	535	399 (74,57 %)	266 (66,66)	179 (44,46%)	253 (63,40%)
		Sinorhizobium fredii NGR234	472	386 (81,26 %)	156 (40,41%)	226 (58,55%)	237 (61,40%)
		Bradyrhizobium diazoefficiens USDA 110	515	393 (76,31 %)	29 (7,38%)	214 (54,45%)	252 (64,12%)
		Bradyrhizobium sp. BTAi1	449	266 (59,24 %)	12 (4,51%)	172 (64,66%)	187 (70,30%)
		Azorhizobium caulinodans ORS 571	363	230 (63,36 %)	106 (46,09%)	146 (63,48%)	131 (56,96%)
		Mesorhizobium japonicum MAFF303099	598	519 (86,79 %)	186 (35,84%)	289 (55,68%)	328 (63,20%)
****
